# Supplementary material for: Regional Management Units for Marine Turtles: A Novel Framework for Prioritizing Conservation and Research across Multiple Scales
Source: PLoS One. 2010 Dec 17;5(12):e15465. doi: 10.1371/journal.pone.0015465 (PMC3003737; doi:10.1371/journal.pone.0015465)
Supplement: Appendix S1 — Complete list of SWOT – The State of the World's Sea Turtles data providers. (XLS) [file pone.0015465.s002.xls]

## Sheet: Sheet1
fullname	country com	country	country	country	country	country
Richard Van der Wal	Antigua and Barbuda, Aruba	Antigua and Barbuda	Aruba
Jeanne A. Mortimer	Anguilla, British Indian Ocean Territory, Seychelles	Anguilla	British Indian Ocean Territory	Seychelles
Alex Gaos	Costa Rica, Ecuador, El Salvador, Mexico, Nicaragua	Costa Rica	Ecuador	El Salvador	Mexico	Nicaragua
Jacques Fretey	Cote D'Ivoire, Equitorial Guinea, Guinea, Senegal	Cote D'Ivoire	Equitorial Guinea	Guinea	Senegal
Flegra Bentivegna	France, Italy	France	Italy
Lily Venizelos	Lebanon, Libyan Arab Jamahiriya, Tunisia	Lebanon	Libyan Arab Jamahiriya	Tunisia
Jérome Bourjea	France, Madagascar	France	Madagascar
Stéphane Ciccione	France, Madagascar	France	Madagascar
Daniel Rios	Ecuador, Mexico, Nicaragua	Ecuador	Mexico	Nicaragua
Dialhy Coello	Ecuador, Mexico	Ecuador	Mexico
Marco Herrera	Ecuador, Mexico	Ecuador	Mexico
David Godfrey	Costa Rica, Panama	Costa Rica	Panama
Emma Harrison	Costa Rica, Panama	Costa Rica	Panama
Juan Patiño Martinez	Colombia, Panama	Colombia	Panama
Nicolas Pilcher	Oman, Papau New Guinea, Qatar, Saudi Arabia	Oman	Papau New Guinea	Qatar	Saudi Arabia
Barry Krueger	Barbados, Papau New Guinea	Barbados	Papau New Guinea
Alain Gibudi	Cameroon, Sao Tome et Principe	Cameroon	Sao Tome et Principe
Justin Gerlach	Honduras, Seychelles	Honduras	Seychelles
Col Limpus	Australia, South Africa	Australia	South Africa
I-Jiunn Cheng	China, Taiwan, Province of China	China	Taiwan, Province of China
Monica Aureggi	Lebanon, Thailand	Lebanon	Thailand
David Addison	Bahamas, United States	Bahamas	United States
Meylan Anne	Panama, United States	Panama	United States
Petro wan Smolbag	Fiji, Vanuatu	Fiji	Vanuatu
Mark Hamann	Australia, Viet Nam	Australia	Viet Nam
Hedelvy Guada	Venezuela, Virgin Islands, U. S.	Venezuela	Virgin Islands, U. S.
The Nature Conservancy	Jamaica, Virgin Islands, U. S.	Jamaica	Virgin Islands, U. S.
Abdulmaula Hamza	Libyan Arab Jamahiriya	Libyan Arab Jamahiriya
Adriana Laura Sarti Martinez	Mexico	Mexico
Aisake Batibasaga	Fiji	Fiji
Alain Goyeau	Guadeloupe	Guadeloupe
Alain Saint-Auret	Guadeloupe	Guadeloupe
Alan Bolten	Bahamas	Bahamas
Alan Rees	Oman	Oman
Alberto Abreu Grobois	Mexico	Mexico
Alec Hutchinson	Costa Rica	Costa Rica
Alejandro Arenas Martínez	Mexico	Mexico
Alejandro Gallardo	Venezuela	Venezuela
Alejandro Pavia	Colombia	Colombia
Alex Peal	Liberia	Liberia
Alexandre Girard	Congo	Congo
Alexsandro Santos	Brazil	Brazil
Alfredo Arteaga	Venezuela	Venezuela
Alfredo Mate	Mozambique	Mozambique
Ali Al-Kiyumi	Oman	Oman
Ali Fuat Canbolat	Turkey	Turkey
Alice Costa	Mozambique	Mozambique
Alvaro Andrés Moreno-Munar	Colombia	Colombia
Amana Nature Reserve	French Guiana	French Guiana
AMEPAS	Martinique	Martinique
Ana Beatriz	Guatemala	Guatemala
Anabella Barrios	Guatemala	Guatemala
Andrea Donaldson	Jamaica	Jamaica
Andrea Whiting	Australia	Australia
Andreas Demetropoulos	Cyprus	Cyprus
Andy Caballero	Sint Maarten	Sint Maarten
Andy Pyle	Costa Rica	Costa Rica
Annette Arjoon	Guyana	Guyana
Annette Broderick	Cyprus	Cyprus
Antonio de Padua Almeida	Brazil	Brazil
Antonio T. Mingozzi	Italy	Italy
Argelis Ruiz	Panama	Panama
Arlington Pickering	Virgin Islands, British	Virgin Islands, British
Armando Barsante	Brazil	Brazil
Arrecife Alacranes Parque Nacional	Mexico	Mexico
Arturo Herrera	Sint Eustatius	Sint Eustatius
Asghar Mobaraki	Iran, Islamic Republic of	Iran, Islamic Republic of
Asociacion Salvemos las Tortugas de Parismina	Costa Rica	Costa Rica
Association Kulalasi	French Guiana	French Guiana
Association Kwata	French Guiana	French Guiana
Association Sépanguy	French Guiana	French Guiana
Augusto Cesar Coelho Dias da Silva	Brazil	Brazil
Augusto Segoviam	Mexico	Mexico
Bacalar Chico Marine Reserve	Belize	Belize
Barry Svendsen	Saint Kitts and Nevis	Saint Kitts and Nevis
Bas Verhage	Gabon	Gabon
Bayram Kütle	Turkey	Turkey
Bektas Sonmez	Turkey	Turkey
Belize Audubon Society	Belize	Belize
Benoit de Thoisy	French Guiana	French Guiana
Bertrand Lettsome	Virgin Islands, British	Virgin Islands, British
Beth Brost	United States	United States
Beverly Mae Nisbeth	Sint Maarten	Sint Maarten
Biol. Carlos Ramirez Cruz	Mexico	Mexico
Bob Prince	Australia	Australia
Bradai Mohamed Mednejmeddine	Tunisia	Tunisia
Brian Leysner	Curacao	Curacao
Caribbean Conservation Cooperation	Panama	Panama
Carl Lloyd	Grenada	Grenada
Carlos Diez	Puerto Rico	Puerto Rico
Carlos Molinero	Honduras	Honduras
Carlos Peralta	Panama	Panama
Carolina Monterrosa	Colombia	Colombia
Caroline Rinaldi	Guadeloupe	Guadeloupe
Catharine Muir	Tanzania, United Republic of	Tanzania, United Republic of
Catherine Siota	Solomon Islands	Solomon Islands
Cathi Campbell	Nicaragua	Nicaragua
Centro Ecológico Akumal	Mexico	Mexico
Cesar Coelho	Brazil	Brazil
Cheryl Appleton	Antigua and Barbuda	Antigua and Barbuda
Chris Poonian	Comoros	Comoros
Christopher De Ruyck	Bahamas	Bahamas
Claire Cayol	Martinique	Martinique
Claudia Ceballos	Colombia	Colombia
Claudio Bellini	Brazil	Brazil
Clemente Balladares	Venezuela	Venezuela
Colum Muccio	Guatemala	Guatemala
CONAP	Mexico	Mexico
Conrad Brian	Angola	Angola
Creusa "Tetha" Hitipeuw	Indonesia	Indonesia
Cristina Ordoñez Espinoza	Panama	Panama
Cynthia Lagueux	Nicaragua	Nicaragua
Dawn Pierre-Nathoniel	Saint Lucia	Saint Lucia
Denise Parker	Hawaii	Hawaii
Dennis Sammy	Trinidad and Tobago	Trinidad and Tobago
Devi Subramanian	India	India
Didiher Chacon Chaverri	Costa Rica	Costa Rica
Diego Amorocho	Colombia	Colombia
Diego Giraldo	Venezuela	Venezuela
Dimitris Margaritoulis	Greece	Greece
Dominique Saheed	Guyana	Guyana
Dominique Vissenberg	Sint Maarten	Sint Maarten
Donna Shaver	United States	United States
DuBose Griffin	United States	United States
Ecologia	Mexico	Mexico
EcoSur	Mexico	Mexico
Edith Van der Wal	Aruba	Aruba
Edo Goverse	Suriname	Suriname
Eduardo Amir Cuevas Flores	Mexico	Mexico
Eduardo Videira	Mozambique	Mozambique
Edward Aruna	Sierra Leone	Sierra Leone
Eleanor Phillips	Bahamas	Bahamas
Elena Abella-Perez	Cape Verde	Cape Verde
Elisio Neto	Sao Tome et Principe	Sao Tome et Principe
Elizabeth Arista de la Rosa	Mexico	Mexico
Elizabeth Gonzalez Payan	Mexico	Mexico
Elizabeth Taylor	Colombia	Colombia
Elizabeth Vélez Carballo	Costa Rica	Costa Rica
Elke Talma	Seychelles	Seychelles
Emile Pemberton	Saint Kitts and Nevis	Saint Kitts and Nevis
Eng-Heng Chan	Malaysia	Malaysia
Enlaces con tu Entorno	Mexico	Mexico
EQUILIBRIO AZUL EQUILIBRIO AZUL	Ecuador	Ecuador
Erendira Gonzalez Diego	Mexico	Mexico
Erendira Valle Padilla	Mexico	Mexico
Eric Delcroix	Guadeloupe	Guadeloupe
Eron Paes e Lima	Brazil	Brazil
Estación Las Tortugas	Costa Rica	Costa Rica
EWT	Costa Rica	Costa Rica
Fabien Creantor	Guadeloupe	Guadeloupe
Fazrullah Rizally	Malaysia	Malaysia
Felix Moncada	Cuba	Cuba
Fernando Enciso Saracho	Mexico	Mexico
Fernando Hernandez	Cuba	Cuba
Fortune Guiougou	Guadeloupe	Guadeloupe
Fouad Naseeb	Venezuela	Venezuela
Frank Paladino	Costa Rica	Costa Rica
Friends of Nature	Belize	Belize
FUCAGUA	Honduras	Honduras
Fundación Científica Los Roques	Venezuela	Venezuela
Gabriel Francia	Costa Rica	Costa Rica
Gabriel Hoinsoude Segniagbeto	Togo	Togo
Gail W. Hearn	Equitorial Guinea	Equitorial Guinea
Gales Point Wildlife Sanctuary Management Team	Belize	Belize
Genaro Solé	Venezuela	Venezuela
George H. Balazs	Hawaii	Hawaii
Georgina Mariona	El Salvador	El Salvador
Gerardo Chaves	Costa Rica	Costa Rica
Gerson Martinez	Honduras	Honduras
Gilles-David Derand	Seychelles	Seychelles
Gina Ebanks-Petrie	Cayman Islands	Cayman Islands
Glovers Reef Marine Reserve	Belize	Belize
Graciela Tiburcio Pintos	Mexico	Mexico
Grande Riviere Environmental Trust	Trinidad and Tobago	Trinidad and Tobago
Grande Riviere Nature Tour Guide Association	Trinidad and Tobago	Trinidad and Tobago
Gregg Moore	Grenada	Grenada
Grupo de Trabajo en Tortugas Marinas del Estado Nueva Esparta	Venezuela	Venezuela
Gustave Lopez	Brazil	Brazil
Guy-Philippe Sounguet	Gabon	Gabon
Harold Chacon	Panama	Panama
Harry Andrews	India	India
Heather Yeates	Trinidad and Tobago	Trinidad and Tobago
Héctor Barrios	Venezuela	Venezuela
Hector C. Horta - Abraham	Puerto Rico	Puerto Rico
Hector Contreras Aguilar	Mexico	Mexico
Heidi Rader	Equitorial Guinea	Equitorial Guinea
Hiroyuki Suganuma	Indonesia	Indonesia
Hussein Zahir	Maldives	Maldives
Ian Bell	Australia	Australia
Ian Lundgren	Virgin Islands, U. S.	Virgin Islands, U. S.
Ian Trengove	Cyprus	Cyprus
Imed Jribi	Tunisia	Tunisia
Imre Esser	Bonaire	Bonaire
Iñaki Abella Gutierrez	Costa Rica	Costa Rica
Inaky Iturbe	Mexico	Mexico
Ingrid Yañez	Costa Rica	Costa Rica
INTEC	Dominican Republic	Dominican Republic
Irene Kelly	Japan	Japan
Isabel Silva	Mozambique	Mozambique
Isaias Majil	Belize	Belize
ISEMAR	Mexico	Mexico
Israel Llamas Gonzalez	Mexico	Mexico
IUCN NL	Suriname	Suriname
Jacinto Rodriguez	Panama	Panama
Jaime Pérez	Guatemala	Guatemala
James Gumbs	Anguilla	Anguilla
James Bali	Malaysia	Malaysia
James Richardson	Antigua and Barbuda	Antigua and Barbuda
Janet Gibson	Belize	Belize
Janice Blumenthal	Cayman Islands	Cayman Islands
Jaqueline Castilhos	Brazil	Brazil
Jean Wiener	Haiti	Haiti
Jean-claude Nicolas	Martinique	Martinique
Jen Beggs	Barbados	Barbados
Jennifer Cruce	Micronesia, Federated States of	Micronesia, Federated States of
Jennifer Gray	Bermuda	Bermuda
Jereme Phillips	United States	United States
Jessica Berkel	Sint Eustatius	Sint Eustatius
Jesús Tomás	Dominican Republic	Dominican Republic
Jim Spotila	Costa Rica	Costa Rica
Joao Carlos Thome	Brazil	Brazil
Johanna Segovia	El Salvador	El Salvador
John Jeffers	Montserrat	Montserrat
Joni Solomon	Cayman Islands	Cayman Islands
José Antonio Trejo Robles	Mexico	Mexico
Jose Barron Hernandez	Mexico	Mexico
José Gomez Peñate	Cote D'Ivoire	Cote D'Ivoire
José Urteaga	Nicaragua	Nicaragua
Joséa S. Dossou-Bodjrènou	Benin	Benin
Joshua Eberdong	Palau	Palau
Juan Carlos Figuera	Venezuela	Venezuela
Judith Garland-Campbell	Turks and Caicos Islands	Turks and Caicos Islands
Jules Ngunguim	Cameroon	Cameroon
Julia Azanza	Cuba	Cuba
Julia Horrocks	Barbados	Barbados
Julie Garnier	Mozambique	Mozambique
Juney Ward	Samoa	Samoa
Kalli De Meyer	Bonaire	Bonaire
Karen Bjorndal	Bahamas	Bahamas
Karen Oceguera Camacho	Mexico	Mexico
Kartik Shanker	India	India
Kate Orchard	Saint Kitts and Nevis	Saint Kitts and Nevis
KAWAN Association	Martinique	Martinique
Kellie Pendoley	Australia	Australia
'Kelvin García Sanabria	Venezuela	Venezuela
Kenneth Mackay	Vanuatu	Vanuatu
Ketut Sarjana Putra	Indonesia	Indonesia
Kevin Jolliffe	Seychelles	Seychelles
Kimberly Stewart	Saint Kitts and Nevis	Saint Kitts and Nevis
Kimberly Woody	Virgin Islands, U. S.	Virgin Islands, U. S.
Kirstin Dobbs	Australia	Australia
La Tortuga Feliz	Costa Rica	Costa Rica
Lachlan Barker	Australia	Australia
L'Association Eco-Lambda	Guadeloupe	Guadeloupe
Laurent Malglaive	Guadeloupe	Guadeloupe
Laurent Kelle	French Guiana	French Guiana
Lee Munson	Sint Eustatius	Sint Eustatius
Lesbia Montero	Puerto Rico	Puerto Rico
Lidia Salinas	Honduras	Honduras
Liliana Quiñones	Colombia	Colombia
Linda Vanherck	Seychelles	Seychelles
Lorna Slade	Turks and Caicos Islands	Turks and Caicos Islands
Luciano Soares	Brazil	Brazil
Lucine Edwards	Saint Vincent and the Grenadines	Saint Vincent and the Grenadines
Luis Felipe Lopez Jurado	Cape Verde	Cape Verde
M. Gaskin Pointe-a-Pierre Wild Fowl Trust	Trinidad and Tobago	Trinidad and Tobago
M. Zahirul Islam	Bangladesh	Bangladesh
Maartje Hilterman	Suriname	Suriname
Mabel Nava	Bonaire	Bonaire
Maggie Muurmans	Indonesia	Indonesia
Mahta Goitom	Eritrea	Eritrea
Mairie de SAINTE-ANNE	Martinique	Martinique
MAIRIE du DIAMANT	Martinique	Martinique
Malama Momoemausu	Samoa	Samoa
Manish Chandi	India	India
Marco Tena Espinoza	Mexico	Mexico
Marea Azul	Mexico	Mexico
Maria Angela Marcovaldi	Brazil	Brazil
María José Barragán	Ecuador	Ecuador
Mariana Malavar Montenegro	Costa Rica	Costa Rica
Mariano Everardo Melendez	Mexico	Mexico
Marie Allen	Cyprus	Cyprus
Marie-Clelia Godgenger	Congo	Congo
Marina Fastigi	Grenada	Grenada
Marino Abrego	Panama	Panama
Mark Dodd	United States	United States
Matthew Godfrey	United States	United States
Matthew Morton	Saint Lucia	Saint Lucia
Mauricio Vasquez	El Salvador	El Salvador
Mervin Hastings	Virgin Islands, British	Virgin Islands, British
Michael Liles	El Salvador	El Salvador
Michel Delaguerre	France	France
Michelle Fernandez	Honduras	Honduras
Michelle Fletcher	Vanuatu	Vanuatu
Michelle Kalamandeen	Guyana	Guyana
Mick Guinea	Australia	Australia
Mike Olendo	Kenya	Kenya
Mike Reynolds	United States	United States
Moise Chasselas	Guadeloupe	Guadeloupe
Mona Khalil	Lebanon	Lebanon
Monica Lopez-Conlon	Costa Rica	Costa Rica
Monique Charrieau	Guadeloupe	Guadeloupe
Murrieta Rosas Jose Luis	Mexico	Mexico
Myroula Hadjichristophorou	Cyprus	Cyprus
Nancy Gladstone	Madagascar	Madagascar
Naomi Doak	Seychelles	Seychelles
Nariva Environmental Trust	Trinidad and Tobago	Trinidad and Tobago
Naveen Namboothri	India	India
Neema Nand	Fiji	Fiji
Nicole Esteban	Sint Eustatius	Sint Eustatius
Norman Javier Flores	Honduras	Honduras
Oguz Türkozan	Turkey	Turkey
Olivier Tartaglino	Guadeloupe	Guadeloupe
ONF	Martinique	Martinique
Pat Turpin	Trinidad and Tobago	Trinidad and Tobago
Patricia Zarate	Ecuador	Ecuador
Patrick Burchfield	Mexico	Mexico
Paul Hoetjes	Curacao	Curacao
Paul Scholte	Venezuela	Venezuela
Paula Sanz	Cape Verde	Cape Verde
Paulo Barata	Brazil	Brazil
Pawi Sports Culture & Eco Club	Trinidad and Tobago	Trinidad and Tobago
Pena Aldrete Vincente	Mexico	Mexico
PEP UPMP	Mexico	Mexico
Peri Mason	Antigua and Barbuda	Antigua and Barbuda
Perla Torres Gago	Nicaragua	Nicaragua
Peter C.H. Pritchard	Guyana	Guyana
Peter Dutton	Papau New Guinea	Papau New Guinea
Peter Ramohia	Solomon Islands	Solomon Islands
Philippe Deproft	Guadeloupe	Guadeloupe
Quelnios	Mexico	Mexico
Rachel Silverman	Costa Rica	Costa Rica
Rafael Gutierrez	Honduras	Honduras
Rafe Boulon	Virgin Islands, U. S.	Virgin Islands, U. S.
Ralph Wilkins	Saint Kitts and Nevis	Saint Kitts and Nevis
Randall Arauz	Costa Rica	Costa Rica
Ray Chatto	Australia	Australia
Rebecca S. King	Grenada	Grenada
Renato Cruz	Philippines	Philippines
René Kantún	Mexico	Mexico
Rhema Kerr Bjorkland	Jamaica	Jamaica
Ría LAGARTOS Reserva de la Biosfera	Mexico	Mexico
Ricardo Hernández	Venezuela	Venezuela
Robert van Dam	Puerto Rico	Puerto Rico
Roberto Luis Herrera Pavón	Mexico	Mexico
Roberto Solano	Costa Rica	Costa Rica
Rodney J. Galama	Papau New Guinea	Papau New Guinea
Roland Mau	Australia	Australia
Romeo Trono	Philippines	Philippines
Ronel Nel	South Africa	South Africa
Rotney Piedra Chacón	Costa Rica	Costa Rica
Rowan Byrne	Dominica	Dominica
Rozenn Le Scao	Martinique	Martinique
Ruben Venegas	Costa Rica	Costa Rica
Rudy van der Elst	Mozambique	Mozambique
Samuel Narciso	Venezuela	Venezuela
Sandra Viejobueno	Costa Rica	Costa Rica
Sandrine Bonotto	Guadeloupe	Guadeloupe
San-Marie Jolliffe	Seychelles	Seychelles
Sapodilla Cayes Marine Reserve	Belize	Belize
Sarah Klain	Palau	Palau
Scott Eckert	Trinidad and Tobago	Trinidad and Tobago
Sebastian Troëng	Costa Rica	Costa Rica
Sebastien Rives	Guadeloupe	Guadeloupe
SEMARNAT	Mexico	Mexico
Serap Ergene	Turkey	Turkey
Seth Stapleton	Dominica	Dominica
Séverine Raigné	Martinique	Martinique
Shakira Azan	Jamaica	Jamaica
Shannon Gore	Virgin Islands, British	Virgin Islands, British
Sophie Guilloux	Guadeloupe	Guadeloupe
South Water Caye Marine Reserve	Belize	Belize
Stephen Dunbar	Honduras	Honduras
Stephen Durand	Dominica	Dominica
Stephen Poon	Trinidad and Tobago	Trinidad and Tobago
Steve Garner	Virgin Islands, U. S.	Virgin Islands, U. S.
STINASU	Suriname	Suriname
Stuart Wynne	Anguilla	Anguilla
Sukarno Wagiman	Malaysia	Malaysia
Şükran Yalçın-Özdilek	Turkey	Turkey
Suzanne Livingstone	Trinidad and Tobago	Trinidad and Tobago
Tamar Ron	Angola	Angola
Tamra Chapman	Australia	Australia
Tecle Mengstu	Eritrea	Eritrea
Teodora Casildo	Honduras	Honduras
Thakoorie Boodoo	Trinidad and Tobago	Trinidad and Tobago
Thierry Guthmuller	Guadeloupe	Guadeloupe
Toco Foundation	Trinidad and Tobago	Trinidad and Tobago
Toledo Institute for Development and Environment	Belize	Belize
Tonya Clovis	Trinidad and Tobago	Trinidad and Tobago
Tricia Lovell	Antigua and Barbuda	Antigua and Barbuda
UAC	Mexico	Mexico
UNACAR	Mexico	Mexico
University Of Belize	Belize	Belize
US Fish and Wildlife Service	Puerto Rico	Puerto Rico
USVI Department of Fish & Wildlife	Virgin Islands, U. S.	Virgin Islands, U. S.
Vagi Rei	Antigua and Barbuda	Antigua and Barbuda
Vicente Guzman	Mexico	Mexico
Vicky Taylor	Costa Rica	Costa Rica
Victorio Diaz Millan	Mexico	Mexico
Vincent Vera	Venezuela	Venezuela
Vivian Páez	Colombia	Colombia
Wagner Quiros	Costa Rica	Costa Rica
Wayne John Fuller	Cyprus	Cyprus
Wayne Sentman	Micronesia, Federated States of	Micronesia, Federated States of
Wilfredo Lopez	El Salvador	El Salvador
William Coles	Virgin Islands, U. S.	Virgin Islands, U. S.
Xavier Delloue	Guadeloupe	Guadeloupe
Yakup Kaska	Turkey	Turkey
Yaniv Levy	Israel	Israel
Yohannes Teclemariam	Eritrea	Eritrea
Yolanda León	Dominican Republic	Dominican Republic
Yoshi Matsuzawa	Japan	Japan
Zandy Hillis-Starr	Virgin Islands, U. S.	Virgin Islands, U. S.
Zuemy Rangel Gonzalez	Mexico	Mexico
Zunilda Baldonado	Colombia	Colombia

## Sheet: Sheet2
fullname	SPEC COM.	species
Abdulmaula Hamza	Caretta caretta	Caretta caretta
Adriana Laura Sarti Martinez	Caretta caretta, Chelonia mydas, Dermochelys coriacea, Eretmochelys imbricata, Lepidochelys kempii, Lepidochelys olivacea	Caretta caretta	Chelonia mydas	Dermochelys coriacea	Eretmochelys imbricata	Lepidochelys kempii	Lepidochelys olivacea
Aisake Batibasaga	Eretmochelys imbricata	Eretmochelys imbricata
Alain Gibudi	Eretmochelys imbricata	Eretmochelys imbricata
Alain Goyeau	Dermochelys coriacea, Eretmochelys imbricata	Dermochelys coriacea	Eretmochelys imbricata
Alain Saint-Auret	Dermochelys coriacea, Eretmochelys imbricata	Dermochelys coriacea	Eretmochelys imbricata
Alan Bolten	Caretta caretta, Eretmochelys imbricata	Caretta caretta	Eretmochelys imbricata
Alan Rees	Eretmochelys imbricata	Eretmochelys imbricata
Alberto Abreu Grobois	Caretta caretta, Chelonia mydas, Dermochelys coriacea, Eretmochelys imbricata	Caretta caretta	Chelonia mydas	Dermochelys coriacea	Eretmochelys imbricata
Alec Hutchinson	Eretmochelys imbricata	Eretmochelys imbricata
Alejandro Arenas Martínez	Caretta caretta	Caretta caretta
Alejandro Gallardo	Caretta caretta, Chelonia mydas, Dermochelys coriacea, Eretmochelys imbricata	Caretta caretta	Chelonia mydas	Dermochelys coriacea	Eretmochelys imbricata
Alejandro Pavia	Caretta caretta, Dermochelys coriacea, Eretmochelys imbricata	Caretta caretta	Dermochelys coriacea	Eretmochelys imbricata
Alex Gaos	Chelonia mydas, Dermochelys coriacea, Eretmochelys imbricata, Lepidochelys olivacea	Chelonia mydas	Dermochelys coriacea	Eretmochelys imbricata	Lepidochelys olivacea
Alex Peal	Eretmochelys imbricata	Eretmochelys imbricata
Alexandre Girard	Chelonia mydas, Dermochelys coriacea, Eretmochelys imbricata, Lepidochelys olivacea	Chelonia mydas	Dermochelys coriacea	Eretmochelys imbricata	Lepidochelys olivacea
Alexsandro Santos	Caretta caretta, Chelonia mydas, Dermochelys coriacea, Eretmochelys imbricata, Lepidochelys olivacea	Caretta caretta	Chelonia mydas	Dermochelys coriacea	Eretmochelys imbricata	Lepidochelys olivacea
Alfredo Arteaga	Caretta caretta, Dermochelys coriacea	Caretta caretta	Dermochelys coriacea
Alfredo Mate	Caretta caretta, Chelonia mydas, Dermochelys coriacea, Eretmochelys imbricata, Lepidochelys olivacea	Caretta caretta	Chelonia mydas	Dermochelys coriacea	Eretmochelys imbricata	Lepidochelys olivacea
Ali Al-Kiyumi	Caretta caretta	Caretta caretta
Ali Fuat Canbolat	Caretta caretta	Caretta caretta
Alice Costa	Caretta caretta, Chelonia mydas, Dermochelys coriacea, Eretmochelys imbricata, Lepidochelys olivacea	Caretta caretta	Chelonia mydas	Dermochelys coriacea	Eretmochelys imbricata	Lepidochelys olivacea
Alvaro Andrés Moreno-Munar	Caretta caretta, Dermochelys coriacea, Eretmochelys imbricata	Caretta caretta	Dermochelys coriacea	Eretmochelys imbricata
Amana Nature Reserve	Chelonia mydas, Dermochelys coriacea, Lepidochelys olivacea	Chelonia mydas	Dermochelys coriacea	Lepidochelys olivacea
AMEPAS	Eretmochelys imbricata	Eretmochelys imbricata
Ana Beatriz	Dermochelys coriacea, Eretmochelys imbricata	Dermochelys coriacea	Eretmochelys imbricata
Anabella Barrios	Dermochelys coriacea, Eretmochelys imbricata	Dermochelys coriacea	Eretmochelys imbricata
Andrea Donaldson	Chelonia mydas, Dermochelys coriacea, Eretmochelys imbricata	Chelonia mydas	Dermochelys coriacea	Eretmochelys imbricata
Andrea Whiting	Natator depressus	Natator depressus
Andreas Demetropoulos	Caretta caretta	Caretta caretta
Andy Caballero	Dermochelys coriacea, Eretmochelys imbricata	Dermochelys coriacea	Eretmochelys imbricata
Andy Pyle	Chelonia mydas, Dermochelys coriacea, Eretmochelys imbricata, Lepidochelys olivacea	Chelonia mydas	Dermochelys coriacea	Eretmochelys imbricata	Lepidochelys olivacea
Annette Arjoon	Dermochelys coriacea, Eretmochelys imbricata	Dermochelys coriacea	Eretmochelys imbricata
Annette Broderick	Caretta caretta	Caretta caretta
Antonio de Padua Almeida	Caretta caretta, Chelonia mydas, Dermochelys coriacea, Eretmochelys imbricata, Lepidochelys olivacea	Caretta caretta	Chelonia mydas	Dermochelys coriacea	Eretmochelys imbricata	Lepidochelys olivacea
Antonio T. Mingozzi	Caretta caretta	Caretta caretta
Argelis Ruiz	Caretta caretta, Chelonia mydas, Dermochelys coriacea, Eretmochelys imbricata, Lepidochelys olivacea	Caretta caretta	Chelonia mydas	Dermochelys coriacea	Eretmochelys imbricata	Lepidochelys olivacea
Arlington Pickering	Dermochelys coriacea	Dermochelys coriacea
Armando Barsante	Caretta caretta, Chelonia mydas, Dermochelys coriacea, Eretmochelys imbricata, Lepidochelys olivacea	Caretta caretta	Chelonia mydas	Dermochelys coriacea	Eretmochelys imbricata	Lepidochelys olivacea
Arrecife Alacranes Parque Nacional	Chelonia mydas	Chelonia mydas
Arturo Herrera	Chelonia mydas, Dermochelys coriacea, Eretmochelys imbricata	Chelonia mydas	Dermochelys coriacea	Eretmochelys imbricata
Asghar Mobaraki	Eretmochelys imbricata	Eretmochelys imbricata
Asociacion Salvemos las Tortugas de Parismina	Eretmochelys imbricata	Eretmochelys imbricata
Association Kulalasi	Chelonia mydas, Dermochelys coriacea, Lepidochelys olivacea	Chelonia mydas	Dermochelys coriacea	Lepidochelys olivacea
Association Kwata	Chelonia mydas, Dermochelys coriacea, Eretmochelys imbricata, Lepidochelys olivacea	Chelonia mydas	Dermochelys coriacea	Eretmochelys imbricata	Lepidochelys olivacea
Association Sépanguy	Chelonia mydas, Dermochelys coriacea, Lepidochelys olivacea	Chelonia mydas	Dermochelys coriacea	Lepidochelys olivacea
Augusto Cesar Coelho Dias da Silva	Caretta caretta, Eretmochelys imbricata, Lepidochelys olivacea	Caretta caretta	Eretmochelys imbricata	Lepidochelys olivacea
Augusto Segoviam	Eretmochelys imbricata	Eretmochelys imbricata
Bacalar Chico Marine Reserve	Caretta caretta, Chelonia mydas, Eretmochelys imbricata	Caretta caretta	Chelonia mydas	Eretmochelys imbricata
Barry Krueger	Eretmochelys imbricata	Eretmochelys imbricata
Barry Svendsen	Dermochelys coriacea	Dermochelys coriacea
Bas Verhage	Dermochelys coriacea, Eretmochelys imbricata, Lepidochelys olivacea	Dermochelys coriacea	Eretmochelys imbricata	Lepidochelys olivacea
Bayram Kütle	Caretta caretta	Caretta caretta
Bektas Sonmez	Caretta caretta	Caretta caretta
Belize Audubon Society	Caretta caretta, Chelonia mydas, Eretmochelys imbricata	Caretta caretta	Chelonia mydas	Eretmochelys imbricata
Benoit de Thoisy	Chelonia mydas, Dermochelys coriacea, Lepidochelys olivacea	Chelonia mydas	Dermochelys coriacea	Lepidochelys olivacea
Bertrand Lettsome	Chelonia mydas, Dermochelys coriacea, Eretmochelys imbricata	Chelonia mydas	Dermochelys coriacea	Eretmochelys imbricata
Beth Brost	Caretta caretta, Chelonia mydas, Dermochelys coriacea	Caretta caretta	Chelonia mydas	Dermochelys coriacea
Beverly Mae Nisbeth	Eretmochelys imbricata	Eretmochelys imbricata
Biol. Carlos Ramirez Cruz	Dermochelys coriacea, Lepidochelys olivacea	Dermochelys coriacea	Lepidochelys olivacea
Bob Prince	Natator depressus	Natator depressus
Bradai Mohamed Mednejmeddine	Caretta caretta	Caretta caretta
Brian Leysner	Caretta caretta, Chelonia mydas, Dermochelys coriacea, Eretmochelys imbricata	Caretta caretta	Chelonia mydas	Dermochelys coriacea	Eretmochelys imbricata
Caribbean Conservation Cooperation	Chelonia mydas, Dermochelys coriacea, Eretmochelys imbricata	Chelonia mydas	Dermochelys coriacea	Eretmochelys imbricata
Carl Lloyd	Dermochelys coriacea, Eretmochelys imbricata	Dermochelys coriacea	Eretmochelys imbricata
Carlos Diez	Chelonia mydas, Dermochelys coriacea, Eretmochelys imbricata	Chelonia mydas	Dermochelys coriacea	Eretmochelys imbricata
Carlos Molinero	Caretta caretta, Chelonia mydas, Dermochelys coriacea, Eretmochelys imbricata	Caretta caretta	Chelonia mydas	Dermochelys coriacea	Eretmochelys imbricata
Carlos Peralta	Caretta caretta, Chelonia mydas, Dermochelys coriacea, Eretmochelys imbricata, Lepidochelys olivacea	Caretta caretta	Chelonia mydas	Dermochelys coriacea	Eretmochelys imbricata	Lepidochelys olivacea
Carolina Monterrosa	Caretta caretta, Dermochelys coriacea, Eretmochelys imbricata	Caretta caretta	Dermochelys coriacea	Eretmochelys imbricata
Caroline Rinaldi	Dermochelys coriacea, Eretmochelys imbricata	Dermochelys coriacea	Eretmochelys imbricata
Catharine Muir	Eretmochelys imbricata	Eretmochelys imbricata
Catherine Siota	Eretmochelys imbricata	Eretmochelys imbricata
Cathi Campbell	Eretmochelys imbricata	Eretmochelys imbricata
Centro Ecológico Akumal	Caretta caretta, Chelonia mydas	Caretta caretta	Chelonia mydas
Cesar Coelho	Caretta caretta, Chelonia mydas, Dermochelys coriacea, Eretmochelys imbricata, Lepidochelys olivacea	Caretta caretta	Chelonia mydas	Dermochelys coriacea	Eretmochelys imbricata	Lepidochelys olivacea
Cheryl Appleton	Chelonia mydas, Dermochelys coriacea, Eretmochelys imbricata	Chelonia mydas	Dermochelys coriacea	Eretmochelys imbricata
Chris Poonian	Chelonia mydas	Chelonia mydas
Christopher De Ruyck	Dermochelys coriacea	Dermochelys coriacea
Claire Cayol	Chelonia mydas, Dermochelys coriacea, Eretmochelys imbricata	Chelonia mydas	Dermochelys coriacea	Eretmochelys imbricata
Claudia Ceballos	Caretta caretta, Chelonia mydas, Dermochelys coriacea, Eretmochelys imbricata	Caretta caretta	Chelonia mydas	Dermochelys coriacea	Eretmochelys imbricata
Claudio Bellini	Caretta caretta, Chelonia mydas, Dermochelys coriacea, Eretmochelys imbricata, Lepidochelys olivacea	Caretta caretta	Chelonia mydas	Dermochelys coriacea	Eretmochelys imbricata	Lepidochelys olivacea
Clemente Balladares	Caretta caretta, Chelonia mydas, Dermochelys coriacea, Eretmochelys imbricata	Caretta caretta	Chelonia mydas	Dermochelys coriacea	Eretmochelys imbricata
Col Limpus	Caretta caretta, Dermochelys coriacea, Eretmochelys imbricata, Natator depressus	Caretta caretta	Dermochelys coriacea	Eretmochelys imbricata	Natator depressus
Colum Muccio	Dermochelys coriacea, Lepidochelys olivacea	Dermochelys coriacea	Lepidochelys olivacea
CONAP	Caretta caretta, Chelonia mydas, Dermochelys coriacea, Eretmochelys imbricata, Lepidochelys kempii	Caretta caretta	Chelonia mydas	Dermochelys coriacea	Eretmochelys imbricata	Lepidochelys kempii
Conrad Brian	Dermochelys coriacea	Dermochelys coriacea
Creusa "Tetha" Hitipeuw	Dermochelys coriacea	Dermochelys coriacea
Cristina Ordoñez Espinoza	Caretta caretta, Dermochelys coriacea, Eretmochelys imbricata	Caretta caretta	Dermochelys coriacea	Eretmochelys imbricata
CX	Eretmochelys imbricata	Eretmochelys imbricata
Cynthia Lagueux	Eretmochelys imbricata	Eretmochelys imbricata
Daniel Rios	Chelonia mydas, Dermochelys coriacea, Eretmochelys imbricata, Lepidochelys olivacea	Chelonia mydas	Dermochelys coriacea	Eretmochelys imbricata	Lepidochelys olivacea
Daniel Rios Olmeda	Dermochelys coriacea, Lepidochelys olivacea	Dermochelys coriacea	Lepidochelys olivacea
David Addison	Caretta caretta, Chelonia mydas	Caretta caretta	Chelonia mydas
David Godfrey	Caretta caretta, Dermochelys coriacea, Eretmochelys imbricata	Caretta caretta	Dermochelys coriacea	Eretmochelys imbricata
Dawn Pierre-Nathoniel	Caretta caretta, Chelonia mydas, Dermochelys coriacea, Eretmochelys imbricata	Caretta caretta	Chelonia mydas	Dermochelys coriacea	Eretmochelys imbricata
Denise Parker	Eretmochelys imbricata	Eretmochelys imbricata
Dennis Sammy	Chelonia mydas, Dermochelys coriacea, Eretmochelys imbricata, Lepidochelys olivacea	Chelonia mydas	Dermochelys coriacea	Eretmochelys imbricata	Lepidochelys olivacea
Devi Subramanian	Dermochelys coriacea	Dermochelys coriacea
Dialhy Coello	Chelonia mydas, Dermochelys coriacea, Eretmochelys imbricata, Lepidochelys olivacea	Chelonia mydas	Dermochelys coriacea	Eretmochelys imbricata	Lepidochelys olivacea
Didiher Chacon Chaverri	Chelonia mydas, Dermochelys coriacea, Eretmochelys imbricata, Lepidochelys olivacea	Chelonia mydas	Dermochelys coriacea	Eretmochelys imbricata	Lepidochelys olivacea
Diego Amorocho	Caretta caretta, Chelonia mydas, Lepidochelys olivacea	Caretta caretta	Chelonia mydas	Lepidochelys olivacea
Diego Giraldo	Caretta caretta, Chelonia mydas, Dermochelys coriacea, Eretmochelys imbricata	Caretta caretta	Chelonia mydas	Dermochelys coriacea	Eretmochelys imbricata
Dimitris Margaritoulis	Caretta caretta	Caretta caretta
Dominique Saheed	Dermochelys coriacea, Eretmochelys imbricata	Dermochelys coriacea	Eretmochelys imbricata
Dominique Vissenberg	Chelonia mydas, Dermochelys coriacea, Eretmochelys imbricata	Chelonia mydas	Dermochelys coriacea	Eretmochelys imbricata
Donna Shaver	Caretta caretta, Chelonia mydas, Dermochelys coriacea, Lepidochelys kempii	Caretta caretta	Chelonia mydas	Dermochelys coriacea	Lepidochelys kempii
DuBose Griffin	Caretta caretta	Caretta caretta
Ecologia	Eretmochelys imbricata	Eretmochelys imbricata
EcoSur	Caretta caretta, Chelonia mydas, Eretmochelys imbricata	Caretta caretta	Chelonia mydas	Eretmochelys imbricata
Edith Van der Wal	Caretta caretta, Chelonia mydas, Dermochelys coriacea, Eretmochelys imbricata	Caretta caretta	Chelonia mydas	Dermochelys coriacea	Eretmochelys imbricata
Edo Goverse	Dermochelys coriacea, Eretmochelys imbricata	Dermochelys coriacea	Eretmochelys imbricata
Eduardo Amir Cuevas Flores	Eretmochelys imbricata	Eretmochelys imbricata
Eduardo Videira	Caretta caretta, Dermochelys coriacea, Lepidochelys olivacea	Caretta caretta	Dermochelys coriacea	Lepidochelys olivacea
Edward Aruna	Caretta caretta, Dermochelys coriacea, Lepidochelys olivacea	Caretta caretta	Dermochelys coriacea	Lepidochelys olivacea
Eleanor Phillips	Caretta caretta, Chelonia mydas, Dermochelys coriacea, Eretmochelys imbricata	Caretta caretta	Chelonia mydas	Dermochelys coriacea	Eretmochelys imbricata
Elena Abella-Perez	Caretta caretta	Caretta caretta
Elisio Neto	Eretmochelys imbricata	Eretmochelys imbricata
Elizabeth Arista de la Rosa	Dermochelys coriacea, Lepidochelys olivacea	Dermochelys coriacea	Lepidochelys olivacea
Elizabeth Gonzalez Payan	Dermochelys coriacea, Lepidochelys olivacea	Dermochelys coriacea	Lepidochelys olivacea
Elizabeth Taylor	Caretta caretta, Chelonia mydas, Dermochelys coriacea, Eretmochelys imbricata	Caretta caretta	Chelonia mydas	Dermochelys coriacea	Eretmochelys imbricata
Elizabeth Vélez Carballo	Dermochelys coriacea, Eretmochelys imbricata	Dermochelys coriacea	Eretmochelys imbricata
Elke Talma	Chelonia mydas, Eretmochelys imbricata	Chelonia mydas	Eretmochelys imbricata
Emile Pemberton	Chelonia mydas, Dermochelys coriacea, Eretmochelys imbricata	Chelonia mydas	Dermochelys coriacea	Eretmochelys imbricata
Emma Harrison	Caretta caretta, Dermochelys coriacea, Eretmochelys imbricata	Caretta caretta	Dermochelys coriacea	Eretmochelys imbricata
Eng-Heng Chan	Dermochelys coriacea, Eretmochelys imbricata	Dermochelys coriacea	Eretmochelys imbricata
Enlaces con tu Entorno	Eretmochelys imbricata	Eretmochelys imbricata
EQUILIBRIO AZUL EQUILIBRIO AZUL	Chelonia mydas, Dermochelys coriacea, Eretmochelys imbricata, Lepidochelys olivacea	Chelonia mydas	Dermochelys coriacea	Eretmochelys imbricata	Lepidochelys olivacea
Erendira Gonzalez Diego	Dermochelys coriacea, Lepidochelys olivacea	Dermochelys coriacea	Lepidochelys olivacea
Erendira Valle Padilla	Dermochelys coriacea, Lepidochelys olivacea	Dermochelys coriacea	Lepidochelys olivacea
Eric Delcroix	Chelonia mydas, Dermochelys coriacea, Eretmochelys imbricata	Chelonia mydas	Dermochelys coriacea	Eretmochelys imbricata
Eron Paes e Lima	Caretta caretta	Caretta caretta
Estación Las Tortugas	Dermochelys coriacea	Dermochelys coriacea
EWT	Dermochelys coriacea	Dermochelys coriacea
Fabien Creantor	Dermochelys coriacea, Eretmochelys imbricata	Dermochelys coriacea	Eretmochelys imbricata
Fazrullah Rizally	Eretmochelys imbricata	Eretmochelys imbricata
Felix Moncada	Caretta caretta, Chelonia mydas, Dermochelys coriacea, Eretmochelys imbricata	Caretta caretta	Chelonia mydas	Dermochelys coriacea	Eretmochelys imbricata
Fernando Enciso Saracho	Dermochelys coriacea, Lepidochelys olivacea	Dermochelys coriacea	Lepidochelys olivacea
Fernando Hernandez	Caretta caretta, Chelonia mydas, Eretmochelys imbricata	Caretta caretta	Chelonia mydas	Eretmochelys imbricata
Flegra Bentivegna	Caretta caretta	Caretta caretta
Fortune Guiougou	Dermochelys coriacea, Eretmochelys imbricata	Dermochelys coriacea	Eretmochelys imbricata
Fouad Naseeb	Caretta caretta, Dermochelys coriacea	Caretta caretta	Dermochelys coriacea
Frank Paladino	Dermochelys coriacea	Dermochelys coriacea
Friends of Nature	Eretmochelys imbricata	Eretmochelys imbricata
FUCAGUA	Caretta caretta, Chelonia mydas, Dermochelys coriacea, Eretmochelys imbricata	Caretta caretta	Chelonia mydas	Dermochelys coriacea	Eretmochelys imbricata
Fundación Científica Los Roques	Caretta caretta, Chelonia mydas, Dermochelys coriacea, Eretmochelys imbricata	Caretta caretta	Chelonia mydas	Dermochelys coriacea	Eretmochelys imbricata
Gabriel Francia	Dermochelys coriacea	Dermochelys coriacea
Gabriel Hoinsoude Segniagbeto	Dermochelys coriacea	Dermochelys coriacea
Gail W. Hearn	Dermochelys coriacea, Eretmochelys imbricata	Dermochelys coriacea	Eretmochelys imbricata
Gales Point Wildlife Sanctuary Management Team	Eretmochelys imbricata	Eretmochelys imbricata
Genaro Solé	Caretta caretta, Chelonia mydas, Eretmochelys imbricata	Caretta caretta	Chelonia mydas	Eretmochelys imbricata
George H. Balazs	Eretmochelys imbricata	Eretmochelys imbricata
Georgina Mariona	Chelonia mydas, Dermochelys coriacea, Eretmochelys imbricata, Lepidochelys olivacea	Chelonia mydas	Dermochelys coriacea	Eretmochelys imbricata	Lepidochelys olivacea
Gerardo Chaves	Chelonia mydas, Dermochelys coriacea, Lepidochelys olivacea	Chelonia mydas	Dermochelys coriacea	Lepidochelys olivacea
Gerson Martinez	Caretta caretta, Chelonia mydas, Dermochelys coriacea, Eretmochelys imbricata	Caretta caretta	Chelonia mydas	Dermochelys coriacea	Eretmochelys imbricata
Gilles-David Derand	Chelonia mydas, Eretmochelys imbricata	Chelonia mydas	Eretmochelys imbricata
Gina Ebanks-Petrie	Caretta caretta, Chelonia mydas	Caretta caretta	Chelonia mydas
Glovers Reef Marine Reserve	Caretta caretta, Chelonia mydas, Eretmochelys imbricata	Caretta caretta	Chelonia mydas	Eretmochelys imbricata
Graciela Tiburcio Pintos	Dermochelys coriacea, Lepidochelys olivacea	Dermochelys coriacea	Lepidochelys olivacea
Grande Riviere Environmental Trust	Chelonia mydas, Dermochelys coriacea, Eretmochelys imbricata, Lepidochelys olivacea	Chelonia mydas	Dermochelys coriacea	Eretmochelys imbricata	Lepidochelys olivacea
Grande Riviere Nature Tour Guide Association	Chelonia mydas, Dermochelys coriacea, Eretmochelys imbricata, Lepidochelys olivacea	Chelonia mydas	Dermochelys coriacea	Eretmochelys imbricata	Lepidochelys olivacea
Gregg Moore	Dermochelys coriacea, Eretmochelys imbricata	Dermochelys coriacea	Eretmochelys imbricata
Grupo de Trabajo en Tortugas Marinas del Estado Nueva Esparta	Dermochelys coriacea	Dermochelys coriacea
Gustave Lopez	Caretta caretta, Chelonia mydas, Dermochelys coriacea, Eretmochelys imbricata, Lepidochelys olivacea	Caretta caretta	Chelonia mydas	Dermochelys coriacea	Eretmochelys imbricata	Lepidochelys olivacea
Guy-Philippe Sounguet	Dermochelys coriacea	Dermochelys coriacea
Harold Chacon	Caretta caretta, Chelonia mydas, Dermochelys coriacea, Eretmochelys imbricata, Lepidochelys olivacea	Caretta caretta	Chelonia mydas	Dermochelys coriacea	Eretmochelys imbricata	Lepidochelys olivacea
Harry Andrews	Dermochelys coriacea, Eretmochelys imbricata	Dermochelys coriacea	Eretmochelys imbricata
Heather Yeates	Chelonia mydas, Dermochelys coriacea, Eretmochelys imbricata	Chelonia mydas	Dermochelys coriacea	Eretmochelys imbricata
Héctor Barrios	Dermochelys coriacea, Eretmochelys imbricata	Dermochelys coriacea	Eretmochelys imbricata
Hector C. Horta - Abraham	Dermochelys coriacea	Dermochelys coriacea
Hector Contreras Aguilar	Dermochelys coriacea, Lepidochelys olivacea	Dermochelys coriacea	Lepidochelys olivacea
Hedelvy Guada	Caretta caretta, Chelonia mydas, Dermochelys coriacea, Eretmochelys imbricata	Caretta caretta	Chelonia mydas	Dermochelys coriacea	Eretmochelys imbricata
Hiroyuki Suganuma	Eretmochelys imbricata	Eretmochelys imbricata
Hussein Zahir	Eretmochelys imbricata	Eretmochelys imbricata
Ian Bell	Eretmochelys imbricata	Eretmochelys imbricata
Ian Lundgren	Caretta caretta, Chelonia mydas, Dermochelys coriacea, Eretmochelys imbricata	Caretta caretta	Chelonia mydas	Dermochelys coriacea	Eretmochelys imbricata
Ian Trengove	Caretta caretta	Caretta caretta
I-Jiunn Cheng	Caretta caretta, Chelonia mydas, Eretmochelys imbricata	Caretta caretta	Chelonia mydas	Eretmochelys imbricata
Imed Jribi	Caretta caretta	Caretta caretta
Imre Esser	Chelonia mydas, Dermochelys coriacea, Eretmochelys imbricata	Chelonia mydas	Dermochelys coriacea	Eretmochelys imbricata
Iñaki Abella Gutierrez	Dermochelys coriacea	Dermochelys coriacea
Inaky Iturbe	Caretta caretta	Caretta caretta
Ingrid Yañez	Chelonia mydas, Dermochelys coriacea, Eretmochelys imbricata, Lepidochelys olivacea	Chelonia mydas	Dermochelys coriacea	Eretmochelys imbricata	Lepidochelys olivacea
INTEC	Caretta caretta, Chelonia mydas, Dermochelys coriacea, Eretmochelys imbricata	Caretta caretta	Chelonia mydas	Dermochelys coriacea	Eretmochelys imbricata
Irene Kelly	Eretmochelys imbricata	Eretmochelys imbricata
Isabel Silva	Chelonia mydas, Eretmochelys imbricata	Chelonia mydas	Eretmochelys imbricata
Isaias Majil	Caretta caretta, Chelonia mydas, Eretmochelys imbricata	Caretta caretta	Chelonia mydas	Eretmochelys imbricata
ISEMAR	Eretmochelys imbricata	Eretmochelys imbricata
Israel Llamas Gonzalez	Dermochelys coriacea, Lepidochelys olivacea	Dermochelys coriacea	Lepidochelys olivacea
IUCN NL	Dermochelys coriacea, Eretmochelys imbricata	Dermochelys coriacea	Eretmochelys imbricata
Jacinto Rodriguez	Caretta caretta, Chelonia mydas, Dermochelys coriacea, Eretmochelys imbricata, Lepidochelys olivacea	Caretta caretta	Chelonia mydas	Dermochelys coriacea	Eretmochelys imbricata	Lepidochelys olivacea
Jacques Fretey	Eretmochelys imbricata	Eretmochelys imbricata
Jaime Pérez	Dermochelys coriacea	Dermochelys coriacea
James Gumbs	Chelonia mydas, Dermochelys coriacea, Eretmochelys imbricata	Chelonia mydas	Dermochelys coriacea	Eretmochelys imbricata
James Bali	Eretmochelys imbricata	Eretmochelys imbricata
James Richardson	Chelonia mydas, Dermochelys coriacea, Eretmochelys imbricata	Chelonia mydas	Dermochelys coriacea	Eretmochelys imbricata
Janet Gibson	Caretta caretta, Chelonia mydas, Eretmochelys imbricata	Caretta caretta	Chelonia mydas	Eretmochelys imbricata
Janice Blumenthal	Caretta caretta, Chelonia mydas, Eretmochelys imbricata	Caretta caretta	Chelonia mydas	Eretmochelys imbricata
Jaqueline Castilhos	Caretta caretta, Chelonia mydas, Dermochelys coriacea, Eretmochelys imbricata, Lepidochelys olivacea	Caretta caretta	Chelonia mydas	Dermochelys coriacea	Eretmochelys imbricata	Lepidochelys olivacea
Jean Wiener	Caretta caretta, Chelonia mydas, Dermochelys coriacea, Eretmochelys imbricata	Caretta caretta	Chelonia mydas	Dermochelys coriacea	Eretmochelys imbricata
Jean-claude Nicolas	Dermochelys coriacea, Eretmochelys imbricata	Dermochelys coriacea	Eretmochelys imbricata
Jeanne A. Mortimer	Chelonia mydas, Dermochelys coriacea, Eretmochelys imbricata	Chelonia mydas	Dermochelys coriacea	Eretmochelys imbricata
Jen Beggs	Chelonia mydas, Dermochelys coriacea, Eretmochelys imbricata	Chelonia mydas	Dermochelys coriacea	Eretmochelys imbricata
Jennifer Cruce	Chelonia mydas, Eretmochelys imbricata	Chelonia mydas	Eretmochelys imbricata
Jennifer Gray	Caretta caretta	Caretta caretta
Jereme Phillips	Caretta caretta	Caretta caretta
Jérome Bourjea	Eretmochelys imbricata	Eretmochelys imbricata
Jessica Berkel	Chelonia mydas, Dermochelys coriacea, Eretmochelys imbricata	Chelonia mydas	Dermochelys coriacea	Eretmochelys imbricata
Jesús Tomás	Chelonia mydas, Dermochelys coriacea, Eretmochelys imbricata	Chelonia mydas	Dermochelys coriacea	Eretmochelys imbricata
Jim Spotila	Dermochelys coriacea	Dermochelys coriacea
Joao Carlos Thome	Caretta caretta, Chelonia mydas, Dermochelys coriacea, Eretmochelys imbricata, Lepidochelys olivacea	Caretta caretta	Chelonia mydas	Dermochelys coriacea	Eretmochelys imbricata	Lepidochelys olivacea
Johanna Segovia	Chelonia mydas, Dermochelys coriacea, Eretmochelys imbricata, Lepidochelys olivacea	Chelonia mydas	Dermochelys coriacea	Eretmochelys imbricata	Lepidochelys olivacea
John Jeffers	Caretta caretta, Chelonia mydas, Eretmochelys imbricata	Caretta caretta	Chelonia mydas	Eretmochelys imbricata
Joni Solomon	Caretta caretta, Chelonia mydas, Eretmochelys imbricata	Caretta caretta	Chelonia mydas	Eretmochelys imbricata
José Antonio Trejo Robles	Dermochelys coriacea, Lepidochelys olivacea	Dermochelys coriacea	Lepidochelys olivacea
Jose Barron Hernandez	Dermochelys coriacea, Lepidochelys olivacea	Dermochelys coriacea	Lepidochelys olivacea
José Gomez Peñate	Dermochelys coriacea	Dermochelys coriacea
José Urteaga	Dermochelys coriacea, Eretmochelys imbricata, Lepidochelys olivacea	Dermochelys coriacea	Eretmochelys imbricata	Lepidochelys olivacea
Joséa S. Dossou-Bodjrènou	Dermochelys coriacea	Dermochelys coriacea
Joshua Eberdong	Eretmochelys imbricata	Eretmochelys imbricata
Juan Carlos Figuera	Caretta caretta, Chelonia mydas, Dermochelys coriacea, Eretmochelys imbricata	Caretta caretta	Chelonia mydas	Dermochelys coriacea	Eretmochelys imbricata
Juan Patiño Martinez	Dermochelys coriacea, Eretmochelys imbricata	Dermochelys coriacea	Eretmochelys imbricata
Judith Garland-Campbell	Caretta caretta, Chelonia mydas, Eretmochelys imbricata	Caretta caretta	Chelonia mydas	Eretmochelys imbricata
Jules Ngunguim	Eretmochelys imbricata	Eretmochelys imbricata
Julia Azanza	Caretta caretta, Chelonia mydas, Dermochelys coriacea, Eretmochelys imbricata	Caretta caretta	Chelonia mydas	Dermochelys coriacea	Eretmochelys imbricata
Julia Horrocks	Chelonia mydas, Dermochelys coriacea, Eretmochelys imbricata	Chelonia mydas	Dermochelys coriacea	Eretmochelys imbricata
Julie Garnier	Chelonia mydas, Eretmochelys imbricata	Chelonia mydas	Eretmochelys imbricata
Juney Ward	Eretmochelys imbricata	Eretmochelys imbricata
Justin Gerlach	Caretta caretta, Chelonia mydas, Dermochelys coriacea, Eretmochelys imbricata	Caretta caretta	Chelonia mydas	Dermochelys coriacea	Eretmochelys imbricata
Kalli De Meyer	Chelonia mydas, Dermochelys coriacea, Eretmochelys imbricata	Chelonia mydas	Dermochelys coriacea	Eretmochelys imbricata
Karen Bjorndal	Eretmochelys imbricata	Eretmochelys imbricata
Karen Oceguera Camacho	Dermochelys coriacea, Lepidochelys olivacea	Dermochelys coriacea	Lepidochelys olivacea
Kartik Shanker	Dermochelys coriacea, Eretmochelys imbricata	Dermochelys coriacea	Eretmochelys imbricata
Kate Orchard	Chelonia mydas, Dermochelys coriacea, Eretmochelys imbricata	Chelonia mydas	Dermochelys coriacea	Eretmochelys imbricata
KAWAN Association	Dermochelys coriacea, Eretmochelys imbricata	Dermochelys coriacea	Eretmochelys imbricata
Kellie Pendoley	Eretmochelys imbricata, Natator depressus	Eretmochelys imbricata	Natator depressus
'Kelvin García Sanabria	Caretta caretta, Chelonia mydas, Dermochelys coriacea, Eretmochelys imbricata	Caretta caretta	Chelonia mydas	Dermochelys coriacea	Eretmochelys imbricata
Kenneth Mackay	Dermochelys coriacea	Dermochelys coriacea
Ketut Sarjana Putra	Chelonia mydas, Dermochelys coriacea, Eretmochelys imbricata	Chelonia mydas	Dermochelys coriacea	Eretmochelys imbricata
Kevin Jolliffe	Chelonia mydas, Eretmochelys imbricata	Chelonia mydas	Eretmochelys imbricata
Kimberly Stewart	Chelonia mydas, Dermochelys coriacea, Eretmochelys imbricata	Chelonia mydas	Dermochelys coriacea	Eretmochelys imbricata
Kimberly Woody	Caretta caretta, Chelonia mydas, Dermochelys coriacea, Eretmochelys imbricata	Caretta caretta	Chelonia mydas	Dermochelys coriacea	Eretmochelys imbricata
Kirstin Dobbs	Eretmochelys imbricata	Eretmochelys imbricata
La Tortuga Feliz	Dermochelys coriacea	Dermochelys coriacea
Lachlan Barker	Caretta caretta, Chelonia mydas	Caretta caretta	Chelonia mydas
L'Association Eco-Lambda	Eretmochelys imbricata	Eretmochelys imbricata
Laurent Malglaive	Dermochelys coriacea, Eretmochelys imbricata	Dermochelys coriacea	Eretmochelys imbricata
Laurent Kelle	Chelonia mydas, Dermochelys coriacea, Eretmochelys imbricata, Lepidochelys olivacea	Chelonia mydas	Dermochelys coriacea	Eretmochelys imbricata	Lepidochelys olivacea
Lee Munson	Chelonia mydas, Dermochelys coriacea, Eretmochelys imbricata	Chelonia mydas	Dermochelys coriacea	Eretmochelys imbricata
Lesbia Montero	Dermochelys coriacea, Eretmochelys imbricata	Dermochelys coriacea	Eretmochelys imbricata
Lidia Salinas	Caretta caretta, Chelonia mydas, Eretmochelys imbricata	Caretta caretta	Chelonia mydas	Eretmochelys imbricata
Liliana Quiñones	Dermochelys coriacea, Eretmochelys imbricata	Dermochelys coriacea	Eretmochelys imbricata
Lily Venizelos	Caretta caretta, Chelonia mydas	Caretta caretta	Chelonia mydas
Linda Vanherck	Eretmochelys imbricata	Eretmochelys imbricata
Lorna Slade	Caretta caretta, Chelonia mydas, Eretmochelys imbricata	Caretta caretta	Chelonia mydas	Eretmochelys imbricata
Luciano Soares	Caretta caretta, Chelonia mydas, Dermochelys coriacea, Eretmochelys imbricata, Lepidochelys olivacea	Caretta caretta	Chelonia mydas	Dermochelys coriacea	Eretmochelys imbricata	Lepidochelys olivacea
Lucine Edwards	Caretta caretta, Chelonia mydas, Dermochelys coriacea, Eretmochelys imbricata	Caretta caretta	Chelonia mydas	Dermochelys coriacea	Eretmochelys imbricata
Luis Felipe Lopez Jurado	Caretta caretta	Caretta caretta
M. Gaskin Pointe-a-Pierre Wild Fowl Trust	Eretmochelys imbricata	Eretmochelys imbricata
M. Zahirul Islam	Caretta caretta, Chelonia mydas, Dermochelys coriacea, Lepidochelys olivacea	Caretta caretta	Chelonia mydas	Dermochelys coriacea	Lepidochelys olivacea
Maartje Hilterman	Dermochelys coriacea, Eretmochelys imbricata	Dermochelys coriacea	Eretmochelys imbricata
Mabel Nava	Caretta caretta, Chelonia mydas, Dermochelys coriacea, Eretmochelys imbricata	Caretta caretta	Chelonia mydas	Dermochelys coriacea	Eretmochelys imbricata
Maggie Muurmans	Chelonia mydas, Dermochelys coriacea, Eretmochelys imbricata	Chelonia mydas	Dermochelys coriacea	Eretmochelys imbricata
Mahta Goitom	Eretmochelys imbricata	Eretmochelys imbricata
Mairie de SAINTE-ANNE	Eretmochelys imbricata	Eretmochelys imbricata
MAIRIE du DIAMANT	Chelonia mydas, Dermochelys coriacea, Eretmochelys imbricata	Chelonia mydas	Dermochelys coriacea	Eretmochelys imbricata
Malama Momoemausu	Eretmochelys imbricata	Eretmochelys imbricata
Manish Chandi	Dermochelys coriacea, Eretmochelys imbricata	Dermochelys coriacea	Eretmochelys imbricata
Marco Herrera	Chelonia mydas, Dermochelys coriacea, Eretmochelys imbricata, Lepidochelys olivacea	Chelonia mydas	Dermochelys coriacea	Eretmochelys imbricata	Lepidochelys olivacea
Marco Tena Espinoza	Dermochelys coriacea, Lepidochelys olivacea	Dermochelys coriacea	Lepidochelys olivacea
Marea Azul	Dermochelys coriacea, Lepidochelys olivacea	Dermochelys coriacea	Lepidochelys olivacea
Maria Angela Marcovaldi	Caretta caretta, Chelonia mydas, Dermochelys coriacea, Eretmochelys imbricata, Lepidochelys olivacea	Caretta caretta	Chelonia mydas	Dermochelys coriacea	Eretmochelys imbricata	Lepidochelys olivacea
María José Barragán	Chelonia mydas, Dermochelys coriacea, Eretmochelys imbricata, Lepidochelys olivacea	Chelonia mydas	Dermochelys coriacea	Eretmochelys imbricata	Lepidochelys olivacea
Mariana Malavar Montenegro	Chelonia mydas, Dermochelys coriacea, Eretmochelys imbricata, Lepidochelys olivacea	Chelonia mydas	Dermochelys coriacea	Eretmochelys imbricata	Lepidochelys olivacea
Mariano Everardo Melendez	Dermochelys coriacea, Lepidochelys olivacea	Dermochelys coriacea	Lepidochelys olivacea
Marie Allen	Caretta caretta	Caretta caretta
Marie-Clelia Godgenger	Chelonia mydas, Dermochelys coriacea, Lepidochelys olivacea	Chelonia mydas	Dermochelys coriacea	Lepidochelys olivacea
Marina Fastigi	Chelonia mydas, Dermochelys coriacea, Eretmochelys imbricata	Chelonia mydas	Dermochelys coriacea	Eretmochelys imbricata
Marino Abrego	Caretta caretta, Chelonia mydas, Dermochelys coriacea, Eretmochelys imbricata, Lepidochelys olivacea	Caretta caretta	Chelonia mydas	Dermochelys coriacea	Eretmochelys imbricata	Lepidochelys olivacea
Mark Dodd	Caretta caretta	Caretta caretta
Mark Hamann	Chelonia mydas, Dermochelys coriacea, Eretmochelys imbricata, Lepidochelys olivacea, Natator depressus	Chelonia mydas	Dermochelys coriacea	Eretmochelys imbricata	Lepidochelys olivacea	Natator depressus
Matthew Godfrey	Caretta caretta, Dermochelys coriacea	Caretta caretta	Dermochelys coriacea
Matthew Morton	Dermochelys coriacea, Eretmochelys imbricata	Dermochelys coriacea	Eretmochelys imbricata
Mauricio Vasquez	Chelonia mydas, Dermochelys coriacea, Eretmochelys imbricata, Lepidochelys olivacea	Chelonia mydas	Dermochelys coriacea	Eretmochelys imbricata	Lepidochelys olivacea
Mervin Hastings	Chelonia mydas, Dermochelys coriacea, Eretmochelys imbricata	Chelonia mydas	Dermochelys coriacea	Eretmochelys imbricata
Meylan Anne	Caretta caretta, Chelonia mydas, Dermochelys coriacea, Eretmochelys imbricata	Caretta caretta	Chelonia mydas	Dermochelys coriacea	Eretmochelys imbricata
Michael Liles	Chelonia mydas, Dermochelys coriacea, Eretmochelys imbricata, Lepidochelys olivacea	Chelonia mydas	Dermochelys coriacea	Eretmochelys imbricata	Lepidochelys olivacea
Michel Delaguerre	Caretta caretta	Caretta caretta
Michelle Fernandez	Caretta caretta, Chelonia mydas, Eretmochelys imbricata	Caretta caretta	Chelonia mydas	Eretmochelys imbricata
Michelle Kalamandeen	Chelonia mydas, Dermochelys coriacea, Eretmochelys imbricata, Lepidochelys olivacea	Chelonia mydas	Dermochelys coriacea	Eretmochelys imbricata	Lepidochelys olivacea
Mick Guinea	Natator depressus	Natator depressus
Mike Olendo	Chelonia mydas, Eretmochelys imbricata	Chelonia mydas	Eretmochelys imbricata
Mike Reynolds	Caretta caretta	Caretta caretta
Moise Chasselas	Dermochelys coriacea, Eretmochelys imbricata	Dermochelys coriacea	Eretmochelys imbricata
Mona Khalil	Caretta caretta, Chelonia mydas	Caretta caretta	Chelonia mydas
Monica Aureggi	Caretta caretta, Chelonia mydas, Dermochelys coriacea	Caretta caretta	Chelonia mydas	Dermochelys coriacea
Monica Lopez-Conlon	Dermochelys coriacea	Dermochelys coriacea
Monique Charrieau	Dermochelys coriacea, Eretmochelys imbricata	Dermochelys coriacea	Eretmochelys imbricata
Murrieta Rosas Jose Luis	Dermochelys coriacea, Lepidochelys olivacea	Dermochelys coriacea	Lepidochelys olivacea
Myroula Hadjichristophorou	Caretta caretta	Caretta caretta
Nancy Gladstone	Caretta caretta	Caretta caretta
Naomi Doak	Chelonia mydas, Eretmochelys imbricata	Chelonia mydas	Eretmochelys imbricata
Nariva Environmental Trust	Chelonia mydas, Dermochelys coriacea, Eretmochelys imbricata, Lepidochelys olivacea	Chelonia mydas	Dermochelys coriacea	Eretmochelys imbricata	Lepidochelys olivacea
Naveen Namboothri	Dermochelys coriacea	Dermochelys coriacea
Neema Nand	Eretmochelys imbricata	Eretmochelys imbricata
Nicolas Pilcher	Caretta caretta, Dermochelys coriacea, Eretmochelys imbricata	Caretta caretta	Dermochelys coriacea	Eretmochelys imbricata
Nicole Esteban	Chelonia mydas, Dermochelys coriacea, Eretmochelys imbricata	Chelonia mydas	Dermochelys coriacea	Eretmochelys imbricata
Norman Javier Flores	Caretta caretta, Dermochelys coriacea	Caretta caretta	Dermochelys coriacea
Oguz Türkozan	Caretta caretta	Caretta caretta
Olivier Tartaglino	Dermochelys coriacea, Eretmochelys imbricata	Dermochelys coriacea	Eretmochelys imbricata
ONF	Eretmochelys imbricata	Eretmochelys imbricata
Pat Turpin	Chelonia mydas, Dermochelys coriacea, Eretmochelys imbricata	Chelonia mydas	Dermochelys coriacea	Eretmochelys imbricata
Patricia Zarate	Chelonia mydas, Eretmochelys imbricata, Lepidochelys olivacea	Chelonia mydas	Eretmochelys imbricata	Lepidochelys olivacea
Patrick Burchfield	Caretta caretta, Chelonia mydas, Dermochelys coriacea, Lepidochelys kempii	Caretta caretta	Chelonia mydas	Dermochelys coriacea	Lepidochelys kempii
Paul Hoetjes	Caretta caretta, Chelonia mydas, Dermochelys coriacea, Eretmochelys imbricata	Caretta caretta	Chelonia mydas	Dermochelys coriacea	Eretmochelys imbricata
Paul Scholte	Caretta caretta, Dermochelys coriacea	Caretta caretta	Dermochelys coriacea
Paula Sanz	Caretta caretta	Caretta caretta
Paulo Barata	Caretta caretta, Chelonia mydas, Dermochelys coriacea, Eretmochelys imbricata, Lepidochelys olivacea	Caretta caretta	Chelonia mydas	Dermochelys coriacea	Eretmochelys imbricata	Lepidochelys olivacea
Pawi Sports Culture & Eco Club	Dermochelys coriacea	Dermochelys coriacea
Pena Aldrete Vincente	Dermochelys coriacea, Lepidochelys olivacea	Dermochelys coriacea	Lepidochelys olivacea
PEP UPMP	Chelonia mydas, Eretmochelys imbricata, Lepidochelys kempii, Lepidochelys olivacea	Chelonia mydas	Eretmochelys imbricata	Lepidochelys kempii	Lepidochelys olivacea
Peri Mason	Chelonia mydas, Dermochelys coriacea, Eretmochelys imbricata	Chelonia mydas	Dermochelys coriacea	Eretmochelys imbricata
Perla Torres Gago	Chelonia mydas, Dermochelys coriacea, Eretmochelys imbricata, Lepidochelys olivacea	Chelonia mydas	Dermochelys coriacea	Eretmochelys imbricata	Lepidochelys olivacea
Peter C.H. Pritchard	Dermochelys coriacea, Eretmochelys imbricata	Dermochelys coriacea	Eretmochelys imbricata
Peter Dutton	Dermochelys coriacea	Dermochelys coriacea
Peter Ramohia	Eretmochelys imbricata	Eretmochelys imbricata
Petro wan Smolbag	Chelonia mydas, Dermochelys coriacea, Eretmochelys imbricata	Chelonia mydas	Dermochelys coriacea	Eretmochelys imbricata
Philippe Deproft	Dermochelys coriacea, Eretmochelys imbricata	Dermochelys coriacea	Eretmochelys imbricata
Quelnios	Eretmochelys imbricata	Eretmochelys imbricata
Rachel Silverman	Chelonia mydas, Dermochelys coriacea, Eretmochelys imbricata, Lepidochelys olivacea	Chelonia mydas	Dermochelys coriacea	Eretmochelys imbricata	Lepidochelys olivacea
Rafael Gutierrez	Caretta caretta, Dermochelys coriacea, Eretmochelys imbricata	Caretta caretta	Dermochelys coriacea	Eretmochelys imbricata
Rafe Boulon	Eretmochelys imbricata	Eretmochelys imbricata
Ralph Wilkins	Chelonia mydas, Dermochelys coriacea, Eretmochelys imbricata	Chelonia mydas	Dermochelys coriacea	Eretmochelys imbricata
Randall Arauz	Chelonia mydas, Dermochelys coriacea, Eretmochelys imbricata, Lepidochelys olivacea	Chelonia mydas	Dermochelys coriacea	Eretmochelys imbricata	Lepidochelys olivacea
Ray Chatto	Eretmochelys imbricata, Natator depressus	Eretmochelys imbricata	Natator depressus
Rebecca S. King	Dermochelys coriacea, Eretmochelys imbricata	Dermochelys coriacea	Eretmochelys imbricata
Renato Cruz	Eretmochelys imbricata	Eretmochelys imbricata
René Kantún	Caretta caretta, Chelonia mydas, Eretmochelys imbricata	Caretta caretta	Chelonia mydas	Eretmochelys imbricata
Rhema Kerr Bjorkland	Chelonia mydas, Dermochelys coriacea, Eretmochelys imbricata	Chelonia mydas	Dermochelys coriacea	Eretmochelys imbricata
Ría LAGARTOS Reserva de la Biosfera	Caretta caretta, Chelonia mydas, Eretmochelys imbricata	Caretta caretta	Chelonia mydas	Eretmochelys imbricata
Ricardo Hernández	Caretta caretta, Dermochelys coriacea	Caretta caretta	Dermochelys coriacea
Richard Van der Wal	Chelonia mydas, Dermochelys coriacea, Eretmochelys imbricata	Chelonia mydas	Dermochelys coriacea	Eretmochelys imbricata
Robert van Dam	Dermochelys coriacea, Eretmochelys imbricata	Dermochelys coriacea	Eretmochelys imbricata
Roberto Luis Herrera Pavón	Caretta caretta, Chelonia mydas, Eretmochelys imbricata	Caretta caretta	Chelonia mydas	Eretmochelys imbricata
Roberto Solano	Dermochelys coriacea, Eretmochelys imbricata	Dermochelys coriacea	Eretmochelys imbricata
Rodney J. Galama	Dermochelys coriacea	Dermochelys coriacea
Roland Mau	Caretta caretta	Caretta caretta
Romeo Trono	Eretmochelys imbricata	Eretmochelys imbricata
Ronel Nel	Caretta caretta, Dermochelys coriacea	Caretta caretta	Dermochelys coriacea
Rotney Piedra Chacón	Dermochelys coriacea, Eretmochelys imbricata	Dermochelys coriacea	Eretmochelys imbricata
Rowan Byrne	Chelonia mydas, Dermochelys coriacea, Eretmochelys imbricata	Chelonia mydas	Dermochelys coriacea	Eretmochelys imbricata
Rozenn Le Scao	Chelonia mydas, Dermochelys coriacea, Eretmochelys imbricata	Chelonia mydas	Dermochelys coriacea	Eretmochelys imbricata
Ruben Venegas	Eretmochelys imbricata	Eretmochelys imbricata
Rudy van der Elst	Caretta caretta, Dermochelys coriacea	Caretta caretta	Dermochelys coriacea
Samuel Narciso	Eretmochelys imbricata	Eretmochelys imbricata
Sandra MacPherson	Caretta caretta	Caretta caretta
Sandra Viejobueno	Chelonia mydas, Dermochelys coriacea, Eretmochelys imbricata, Lepidochelys olivacea	Chelonia mydas	Dermochelys coriacea	Eretmochelys imbricata	Lepidochelys olivacea
Sandrine Bonotto	Dermochelys coriacea, Eretmochelys imbricata	Dermochelys coriacea	Eretmochelys imbricata
San-Marie Jolliffe	Chelonia mydas, Eretmochelys imbricata	Chelonia mydas	Eretmochelys imbricata
Sapodilla Cayes Marine Reserve	Eretmochelys imbricata	Eretmochelys imbricata
Sarah Klain	Eretmochelys imbricata	Eretmochelys imbricata
Scott Eckert	Chelonia mydas, Dermochelys coriacea, Eretmochelys imbricata, Lepidochelys olivacea	Chelonia mydas	Dermochelys coriacea	Eretmochelys imbricata	Lepidochelys olivacea
Sebastian Troëng	Caretta caretta, Dermochelys coriacea, Eretmochelys imbricata	Caretta caretta	Dermochelys coriacea	Eretmochelys imbricata
Sebastien Rives	Dermochelys coriacea, Eretmochelys imbricata	Dermochelys coriacea	Eretmochelys imbricata
SEMARNAT	Caretta caretta, Chelonia mydas, Eretmochelys imbricata, Lepidochelys kempii, Lepidochelys olivacea	Caretta caretta	Chelonia mydas	Eretmochelys imbricata	Lepidochelys kempii	Lepidochelys olivacea
Serap Ergene	Caretta caretta	Caretta caretta
Seth Stapleton	Chelonia mydas, Dermochelys coriacea, Eretmochelys imbricata	Chelonia mydas	Dermochelys coriacea	Eretmochelys imbricata
Séverine Raigné	Chelonia mydas, Dermochelys coriacea, Eretmochelys imbricata	Chelonia mydas	Dermochelys coriacea	Eretmochelys imbricata
Shakira Azan	Eretmochelys imbricata	Eretmochelys imbricata
Shannon Gore	Chelonia mydas, Dermochelys coriacea, Eretmochelys imbricata	Chelonia mydas	Dermochelys coriacea	Eretmochelys imbricata
Sophie Guilloux	Dermochelys coriacea, Eretmochelys imbricata	Dermochelys coriacea	Eretmochelys imbricata
South Water Caye Marine Reserve	Eretmochelys imbricata	Eretmochelys imbricata
Stéphane Ciccione	Eretmochelys imbricata	Eretmochelys imbricata
Stephen Dunbar	Lepidochelys olivacea	Lepidochelys olivacea
Stephen Durand	Chelonia mydas, Dermochelys coriacea, Eretmochelys imbricata	Chelonia mydas	Dermochelys coriacea	Eretmochelys imbricata
Stephen Poon	Chelonia mydas, Dermochelys coriacea, Eretmochelys imbricata, Lepidochelys olivacea	Chelonia mydas	Dermochelys coriacea	Eretmochelys imbricata	Lepidochelys olivacea
Steve Garner	Chelonia mydas, Dermochelys coriacea, Eretmochelys imbricata	Chelonia mydas	Dermochelys coriacea	Eretmochelys imbricata
STINASU	Dermochelys coriacea, Eretmochelys imbricata	Dermochelys coriacea	Eretmochelys imbricata
Stuart Wynne	Chelonia mydas, Dermochelys coriacea, Eretmochelys imbricata	Chelonia mydas	Dermochelys coriacea	Eretmochelys imbricata
Sukarno Wagiman	Eretmochelys imbricata	Eretmochelys imbricata
Şükran Yalçın-Özdilek	Caretta caretta	Caretta caretta
Suzanne Livingstone	Dermochelys coriacea, Eretmochelys imbricata	Dermochelys coriacea	Eretmochelys imbricata
Tamar Ron	Dermochelys coriacea, Lepidochelys olivacea	Dermochelys coriacea	Lepidochelys olivacea
Tamra Chapman	Caretta caretta	Caretta caretta
Teodora Casildo	Caretta caretta, Dermochelys coriacea	Caretta caretta	Dermochelys coriacea
Thakoorie Boodoo	Chelonia mydas, Dermochelys coriacea, Eretmochelys imbricata	Chelonia mydas	Dermochelys coriacea	Eretmochelys imbricata
The Nature Conservancy	Chelonia mydas, Eretmochelys imbricata	Chelonia mydas	Eretmochelys imbricata
Thierry Guthmuller	Dermochelys coriacea, Eretmochelys imbricata	Dermochelys coriacea	Eretmochelys imbricata
Toco Foundation	Dermochelys coriacea, Eretmochelys imbricata	Dermochelys coriacea	Eretmochelys imbricata
Toledo Institute for Development and Environment	Eretmochelys imbricata	Eretmochelys imbricata
Tonya Clovis	Chelonia mydas, Dermochelys coriacea, Eretmochelys imbricata	Chelonia mydas	Dermochelys coriacea	Eretmochelys imbricata
Tricia Lovell	Chelonia mydas, Dermochelys coriacea, Eretmochelys imbricata	Chelonia mydas	Dermochelys coriacea	Eretmochelys imbricata
UAC	Chelonia mydas, Eretmochelys imbricata	Chelonia mydas	Eretmochelys imbricata
UNACAR	Chelonia mydas, Eretmochelys imbricata, Lepidochelys kempii	Chelonia mydas	Eretmochelys imbricata	Lepidochelys kempii
University Of Belize	Eretmochelys imbricata	Eretmochelys imbricata
US Fish and Wildlife Service	Eretmochelys imbricata	Eretmochelys imbricata
USVI Department of Fish & Wildlife	Chelonia mydas, Dermochelys coriacea, Eretmochelys imbricata	Chelonia mydas	Dermochelys coriacea	Eretmochelys imbricata
Vagi Rei	Chelonia mydas, Dermochelys coriacea, Eretmochelys imbricata	Chelonia mydas	Dermochelys coriacea	Eretmochelys imbricata
Vicente Guzman	Chelonia mydas, Dermochelys coriacea, Eretmochelys imbricata, Lepidochelys kempii, Lepidochelys olivacea	Chelonia mydas	Dermochelys coriacea	Eretmochelys imbricata	Lepidochelys kempii	Lepidochelys olivacea
Vicky Taylor	Eretmochelys imbricata	Eretmochelys imbricata
Victorio Diaz Millan	Dermochelys coriacea, Lepidochelys olivacea	Dermochelys coriacea	Lepidochelys olivacea
Vincent Vera	Caretta caretta, Chelonia mydas, Dermochelys coriacea, Eretmochelys imbricata	Caretta caretta	Chelonia mydas	Dermochelys coriacea	Eretmochelys imbricata
Vivian Páez	Dermochelys coriacea, Eretmochelys imbricata	Dermochelys coriacea	Eretmochelys imbricata
Wagner Quiros	Chelonia mydas, Dermochelys coriacea, Lepidochelys olivacea	Chelonia mydas	Dermochelys coriacea	Lepidochelys olivacea
Wayne John Fuller	Caretta caretta	Caretta caretta
Wayne Sentman	Chelonia mydas, Eretmochelys imbricata	Chelonia mydas	Eretmochelys imbricata
Wilfredo Lopez	Chelonia mydas, Dermochelys coriacea, Eretmochelys imbricata, Lepidochelys olivacea	Chelonia mydas	Dermochelys coriacea	Eretmochelys imbricata	Lepidochelys olivacea
William Coles	Dermochelys coriacea	Dermochelys coriacea
Xavier Delloue	Dermochelys coriacea, Eretmochelys imbricata	Dermochelys coriacea	Eretmochelys imbricata
Yakup Kaska	Caretta caretta	Caretta caretta
Yaniv Levy	Caretta caretta	Caretta caretta
Yohannes Teclemariam	Eretmochelys imbricata	Eretmochelys imbricata
Yolanda León	Caretta caretta, Chelonia mydas, Dermochelys coriacea, Eretmochelys imbricata	Caretta caretta	Chelonia mydas	Dermochelys coriacea	Eretmochelys imbricata
Yoshi Matsuzawa	Caretta caretta, Eretmochelys imbricata	Caretta caretta	Eretmochelys imbricata
Zandy Hillis-Starr	Caretta caretta, Chelonia mydas, Dermochelys coriacea, Eretmochelys imbricata	Caretta caretta	Chelonia mydas	Dermochelys coriacea	Eretmochelys imbricata
Zuemy Rangel Gonzalez	Dermochelys coriacea, Lepidochelys olivacea	Dermochelys coriacea	Lepidochelys olivacea
Zunilda Baldonado	Caretta caretta, Chelonia mydas, Dermochelys coriacea, Eretmochelys imbricata	Caretta caretta	Chelonia mydas	Dermochelys coriacea	Eretmochelys imbricata

## Sheet: Sheet3
fullname	countries	species
Abdulmaula Hamza	Libyan Arab Jamahiriya	Caretta caretta
Adriana Laura Sarti Martinez	Mexico	Caretta caretta, Chelonia mydas, Dermochelys coriacea, Eretmochelys imbricata, Lepidochelys kempii, Lepidochelys olivacea
Aisake Batibasaga	Fiji	Eretmochelys imbricata
Alain Gibudi	Cameroon, Sao Tome et Principe	Eretmochelys imbricata
Alain Goyeau	Guadeloupe	Dermochelys coriacea, Eretmochelys imbricata
Alain Saint-Auret	Guadeloupe	Dermochelys coriacea, Eretmochelys imbricata
Alan Bolten	Bahamas	Caretta caretta, Eretmochelys imbricata
Alan Rees	Oman	Eretmochelys imbricata
Alberto Abreu Grobois	Mexico	Caretta caretta, Chelonia mydas, Dermochelys coriacea, Eretmochelys imbricata
Alec Hutchinson	Costa Rica	Eretmochelys imbricata
Alejandro Arenas Martínez	Mexico	Caretta caretta
Alejandro Gallardo	Venezuela	Caretta caretta, Chelonia mydas, Dermochelys coriacea, Eretmochelys imbricata
Alejandro Pavia	Colombia	Caretta caretta, Dermochelys coriacea, Eretmochelys imbricata
Alex Gaos	Costa Rica, Ecuador, El Salvador, Mexico, Nicaragua	Chelonia mydas, Dermochelys coriacea, Eretmochelys imbricata, Lepidochelys olivacea
Alex Peal	Liberia	Eretmochelys imbricata
Alexandre Girard	Congo	Chelonia mydas, Dermochelys coriacea, Eretmochelys imbricata, Lepidochelys olivacea
Alexsandro Santos	Brazil	Caretta caretta, Chelonia mydas, Dermochelys coriacea, Eretmochelys imbricata, Lepidochelys olivacea
Alfredo Arteaga	Venezuela	Caretta caretta, Dermochelys coriacea
Alfredo Mate	Mozambique	Caretta caretta, Chelonia mydas, Dermochelys coriacea, Eretmochelys imbricata, Lepidochelys olivacea
Ali Al-Kiyumi	Oman	Caretta caretta
Ali Fuat Canbolat	Turkey	Caretta caretta
Alice Costa	Mozambique	Caretta caretta, Chelonia mydas, Dermochelys coriacea, Eretmochelys imbricata, Lepidochelys olivacea
Alvaro Andrés Moreno-Munar	Colombia	Caretta caretta, Dermochelys coriacea, Eretmochelys imbricata
Amana Nature Reserve	French Guiana	Chelonia mydas, Dermochelys coriacea, Lepidochelys olivacea
AMEPAS	Martinique	Eretmochelys imbricata
Ana Beatriz	Guatemala	Dermochelys coriacea, Eretmochelys imbricata
Anabella Barrios	Guatemala	Dermochelys coriacea, Eretmochelys imbricata
Andrea Donaldson	Jamaica	Chelonia mydas, Dermochelys coriacea, Eretmochelys imbricata
Andrea Whiting	Australia	Natator depressus
Andreas Demetropoulos	Cyprus	Caretta caretta
Andy Caballero	Sint Maarten	Dermochelys coriacea, Eretmochelys imbricata
Andy Pyle	Costa Rica	Chelonia mydas, Dermochelys coriacea, Eretmochelys imbricata, Lepidochelys olivacea
Annette Arjoon	Guyana	Dermochelys coriacea, Eretmochelys imbricata
Annette Broderick	Cyprus	Caretta caretta
Antonio de Padua Almeida	Brazil	Caretta caretta, Chelonia mydas, Dermochelys coriacea, Eretmochelys imbricata, Lepidochelys olivacea
Antonio T. Mingozzi	Italy	Caretta caretta
Argelis Ruiz	Panama	Caretta caretta, Chelonia mydas, Dermochelys coriacea, Eretmochelys imbricata, Lepidochelys olivacea
Arlington Pickering	Virgin Islands, British	Dermochelys coriacea
Armando Barsante	Brazil	Caretta caretta, Chelonia mydas, Dermochelys coriacea, Eretmochelys imbricata, Lepidochelys olivacea
Arrecife Alacranes Parque Nacional	Mexico	Chelonia mydas
Arturo Herrera	Sint Eustatius	Chelonia mydas, Dermochelys coriacea, Eretmochelys imbricata
Asghar Mobaraki	Iran, Islamic Republic of	Eretmochelys imbricata
Asociacion Salvemos las Tortugas de Parismina	Costa Rica	Eretmochelys imbricata
Association Kulalasi	French Guiana	Chelonia mydas, Dermochelys coriacea, Lepidochelys olivacea
Association Kwata	French Guiana	Chelonia mydas, Dermochelys coriacea, Eretmochelys imbricata, Lepidochelys olivacea
Association Sépanguy	French Guiana	Chelonia mydas, Dermochelys coriacea, Lepidochelys olivacea
Augusto Cesar Coelho Dias da Silva	Brazil	Caretta caretta, Eretmochelys imbricata, Lepidochelys olivacea
Augusto Segoviam	Mexico	Eretmochelys imbricata
Bacalar Chico Marine Reserve	Belize	Caretta caretta, Chelonia mydas, Eretmochelys imbricata
Barry Krueger	Barbados, Papau New Guinea	Eretmochelys imbricata
Barry Svendsen	Saint Kitts and Nevis	Dermochelys coriacea
Bas Verhage	Gabon	Dermochelys coriacea, Eretmochelys imbricata, Lepidochelys olivacea
Bayram Kütle	Turkey	Caretta caretta
Bektas Sonmez	Turkey	Caretta caretta
Belize Audubon Society	Belize	Caretta caretta, Chelonia mydas, Eretmochelys imbricata
Benoit de Thoisy	French Guiana	Chelonia mydas, Dermochelys coriacea, Lepidochelys olivacea
Bertrand Lettsome	Virgin Islands, British	Chelonia mydas, Dermochelys coriacea, Eretmochelys imbricata
Beth Brost	United States	Caretta caretta, Chelonia mydas, Dermochelys coriacea
Beverly Mae Nisbeth	Sint Maarten	Eretmochelys imbricata
Biol. Carlos Ramirez Cruz	Mexico	Dermochelys coriacea, Lepidochelys olivacea
Bob Prince	Australia	Natator depressus
Bradai Mohamed Mednejmeddine	Tunisia	Caretta caretta
Brian Leysner	Curacao	Caretta caretta, Chelonia mydas, Dermochelys coriacea, Eretmochelys imbricata
Caribbean Conservation Cooperation	Panama	Chelonia mydas, Dermochelys coriacea, Eretmochelys imbricata
Carl Lloyd	Grenada	Dermochelys coriacea, Eretmochelys imbricata
Carlos Diez	Puerto Rico	Chelonia mydas, Dermochelys coriacea, Eretmochelys imbricata
Carlos Molinero	Honduras	Caretta caretta, Chelonia mydas, Dermochelys coriacea, Eretmochelys imbricata
Carlos Peralta	Panama	Caretta caretta, Chelonia mydas, Dermochelys coriacea, Eretmochelys imbricata, Lepidochelys olivacea
Carolina Monterrosa	Colombia	Caretta caretta, Dermochelys coriacea, Eretmochelys imbricata
Caroline Rinaldi	Guadeloupe	Dermochelys coriacea, Eretmochelys imbricata
Catharine Muir	Tanzania, United Republic of	Eretmochelys imbricata
Catherine Siota	Solomon Islands	Eretmochelys imbricata
Cathi Campbell	Nicaragua	Eretmochelys imbricata
Centro Ecológico Akumal	Mexico	Caretta caretta, Chelonia mydas
Cesar Coelho	Brazil	Caretta caretta, Chelonia mydas, Dermochelys coriacea, Eretmochelys imbricata, Lepidochelys olivacea
Cheryl Appleton	Antigua and Barbuda	Chelonia mydas, Dermochelys coriacea, Eretmochelys imbricata
Chris Poonian	Comoros	Chelonia mydas
Christopher De Ruyck	Bahamas	Dermochelys coriacea
Claire Cayol	Martinique	Chelonia mydas, Dermochelys coriacea, Eretmochelys imbricata
Claudia Ceballos	Colombia	Caretta caretta, Chelonia mydas, Dermochelys coriacea, Eretmochelys imbricata
Claudio Bellini	Brazil	Caretta caretta, Chelonia mydas, Dermochelys coriacea, Eretmochelys imbricata, Lepidochelys olivacea
Clemente Balladares	Venezuela	Caretta caretta, Chelonia mydas, Dermochelys coriacea, Eretmochelys imbricata
Col Limpus	Australia, South Africa	Caretta caretta, Dermochelys coriacea, Eretmochelys imbricata, Natator depressus
Colum Muccio	Guatemala	Dermochelys coriacea, Lepidochelys olivacea
CONAP	Mexico	Caretta caretta, Chelonia mydas, Dermochelys coriacea, Eretmochelys imbricata, Lepidochelys kempii
Conrad Brian	Angola	Dermochelys coriacea
Creusa "Tetha" Hitipeuw	Indonesia	Dermochelys coriacea
Cristina Ordoñez Espinoza	Panama	Caretta caretta, Dermochelys coriacea, Eretmochelys imbricata
Cynthia Lagueux	Nicaragua	Eretmochelys imbricata
Daniel Rios	Ecuador, Mexico, Nicaragua	Eretmochelys imbricata
David Addison	Bahamas, United States	Chelonia mydas, Dermochelys coriacea, Eretmochelys imbricata, Lepidochelys olivacea
David Godfrey	Costa Rica, Panama	Dermochelys coriacea, Lepidochelys olivacea
Dawn Pierre-Nathoniel	Saint Lucia	Caretta caretta, Chelonia mydas
Denise Parker	Hawaii	Caretta caretta, Dermochelys coriacea, Eretmochelys imbricata
Dennis Sammy	Trinidad and Tobago	Caretta caretta, Chelonia mydas, Dermochelys coriacea, Eretmochelys imbricata
Devi Subramanian	India	Eretmochelys imbricata
Dialhy Coello	Ecuador, Mexico	Chelonia mydas, Dermochelys coriacea, Eretmochelys imbricata, Lepidochelys olivacea
Didiher Chacon Chaverri	Costa Rica	Dermochelys coriacea
Diego Amorocho	Colombia	Chelonia mydas, Dermochelys coriacea, Eretmochelys imbricata, Lepidochelys olivacea
Diego Giraldo	Venezuela	Chelonia mydas, Dermochelys coriacea, Eretmochelys imbricata, Lepidochelys olivacea
Dimitris Margaritoulis	Greece	Caretta caretta, Chelonia mydas, Lepidochelys olivacea
Dominique Saheed	Guyana	Caretta caretta, Chelonia mydas, Dermochelys coriacea, Eretmochelys imbricata
Dominique Vissenberg	Sint Maarten	Caretta caretta
Donna Shaver	United States	Dermochelys coriacea, Eretmochelys imbricata
DuBose Griffin	United States	Chelonia mydas, Dermochelys coriacea, Eretmochelys imbricata
Ecologia	Mexico	Caretta caretta, Chelonia mydas, Dermochelys coriacea, Lepidochelys kempii
EcoSur	Mexico	Caretta caretta
Edith Van der Wal	Aruba	Eretmochelys imbricata
Edo Goverse	Suriname	Caretta caretta, Chelonia mydas, Eretmochelys imbricata
Eduardo Amir Cuevas Flores	Mexico	Caretta caretta, Chelonia mydas, Dermochelys coriacea, Eretmochelys imbricata
Eduardo Videira	Mozambique	Dermochelys coriacea, Eretmochelys imbricata
Edward Aruna	Sierra Leone	Eretmochelys imbricata
Eleanor Phillips	Bahamas	Caretta caretta, Dermochelys coriacea, Lepidochelys olivacea
Elena Abella-Perez	Cape Verde	Caretta caretta, Dermochelys coriacea, Lepidochelys olivacea
Elisio Neto	Sao Tome et Principe	Caretta caretta, Chelonia mydas, Dermochelys coriacea, Eretmochelys imbricata
Elizabeth Arista de la Rosa	Mexico	Caretta caretta
Elizabeth Gonzalez Payan	Mexico	Eretmochelys imbricata
Elizabeth Taylor	Colombia	Dermochelys coriacea, Lepidochelys olivacea
Elizabeth Vélez Carballo	Costa Rica	Dermochelys coriacea, Lepidochelys olivacea
Elke Talma	Seychelles	Caretta caretta, Chelonia mydas, Dermochelys coriacea, Eretmochelys imbricata
Emile Pemberton	Saint Kitts and Nevis	Dermochelys coriacea, Eretmochelys imbricata
Emma Harrison	Costa Rica, Panama	Chelonia mydas, Eretmochelys imbricata
Eng-Heng Chan	Malaysia	Chelonia mydas, Dermochelys coriacea, Eretmochelys imbricata
Enlaces con tu Entorno	Mexico	Caretta caretta, Dermochelys coriacea, Eretmochelys imbricata
EQUILIBRIO AZUL EQUILIBRIO AZUL	Ecuador	Dermochelys coriacea, Eretmochelys imbricata
Erendira Gonzalez Diego	Mexico	Eretmochelys imbricata
Erendira Valle Padilla	Mexico	Chelonia mydas, Dermochelys coriacea, Eretmochelys imbricata, Lepidochelys olivacea
Eric Delcroix	Guadeloupe	Dermochelys coriacea, Lepidochelys olivacea
Eron Paes e Lima	Brazil	Dermochelys coriacea, Lepidochelys olivacea
Estación Las Tortugas	Costa Rica	Chelonia mydas, Dermochelys coriacea, Eretmochelys imbricata
EWT	Costa Rica	Caretta caretta
Fabien Creantor	Guadeloupe	Dermochelys coriacea
Fazrullah Rizally	Malaysia	Dermochelys coriacea
Felix Moncada	Cuba	Dermochelys coriacea, Eretmochelys imbricata
Fernando Enciso Saracho	Mexico	Eretmochelys imbricata
Fernando Hernandez	Cuba	Caretta caretta, Chelonia mydas, Dermochelys coriacea, Eretmochelys imbricata
Flegra Bentivegna	France, Italy	Dermochelys coriacea, Lepidochelys olivacea
Fortune Guiougou	Guadeloupe	Caretta caretta, Chelonia mydas, Eretmochelys imbricata
Fouad Naseeb	Venezuela	Caretta caretta
Frank Paladino	Costa Rica	Dermochelys coriacea, Eretmochelys imbricata
Friends of Nature	Belize	Caretta caretta, Dermochelys coriacea
FUCAGUA	Honduras	Dermochelys coriacea
Fundación Científica Los Roques	Venezuela	Eretmochelys imbricata
Gabriel Francia	Costa Rica	Caretta caretta, Chelonia mydas, Dermochelys coriacea, Eretmochelys imbricata
Gabriel Hoinsoude Segniagbeto	Togo	Caretta caretta, Chelonia mydas, Dermochelys coriacea, Eretmochelys imbricata
Gail W. Hearn	Equitorial Guinea	Dermochelys coriacea
Gales Point Wildlife Sanctuary Management Team	Belize	Dermochelys coriacea
Genaro Solé	Venezuela	Dermochelys coriacea, Eretmochelys imbricata
George H. Balazs	Hawaii	Eretmochelys imbricata
Georgina Mariona	El Salvador	Caretta caretta, Chelonia mydas, Eretmochelys imbricata
Gerardo Chaves	Costa Rica	Eretmochelys imbricata
Gerson Martinez	Honduras	Chelonia mydas, Dermochelys coriacea, Eretmochelys imbricata, Lepidochelys olivacea
Gilles-David Derand	Seychelles	Chelonia mydas, Dermochelys coriacea, Lepidochelys olivacea
Gina Ebanks-Petrie	Cayman Islands	Caretta caretta, Chelonia mydas, Dermochelys coriacea, Eretmochelys imbricata
Glovers Reef Marine Reserve	Belize	Chelonia mydas, Eretmochelys imbricata
Graciela Tiburcio Pintos	Mexico	Caretta caretta, Chelonia mydas
Grande Riviere Environmental Trust	Trinidad and Tobago	Caretta caretta, Chelonia mydas, Eretmochelys imbricata
Grande Riviere Nature Tour Guide Association	Trinidad and Tobago	Dermochelys coriacea, Lepidochelys olivacea
Gregg Moore	Grenada	Chelonia mydas, Dermochelys coriacea, Eretmochelys imbricata, Lepidochelys olivacea
Grupo de Trabajo en Tortugas Marinas del Estado Nueva Esparta	Venezuela	Chelonia mydas, Dermochelys coriacea, Eretmochelys imbricata, Lepidochelys olivacea
Gustave Lopez	Brazil	Dermochelys coriacea, Eretmochelys imbricata
Guy-Philippe Sounguet	Gabon	Dermochelys coriacea
Harold Chacon	Panama	Caretta caretta, Chelonia mydas, Dermochelys coriacea, Eretmochelys imbricata, Lepidochelys olivacea
Harry Andrews	India	Dermochelys coriacea
Heather Yeates	Trinidad and Tobago	Caretta caretta, Chelonia mydas, Dermochelys coriacea, Eretmochelys imbricata, Lepidochelys olivacea
Héctor Barrios	Venezuela	Dermochelys coriacea, Eretmochelys imbricata
Hector C. Horta - Abraham	Puerto Rico	Chelonia mydas, Dermochelys coriacea, Eretmochelys imbricata
Hector Contreras Aguilar	Mexico	Dermochelys coriacea, Eretmochelys imbricata
Hedelvy Guada	Venezuela, Virgin Islands, U. S.	Dermochelys coriacea
Heidi Rader	Equitorial Guinea	Dermochelys coriacea, Lepidochelys olivacea
Hiroyuki Suganuma	Indonesia	Caretta caretta, Chelonia mydas, Dermochelys coriacea, Eretmochelys imbricata
Hussein Zahir	Maldives	Eretmochelys imbricata
Ian Bell	Australia	Eretmochelys imbricata
Ian Lundgren	Virgin Islands, U. S.	Eretmochelys imbricata
Ian Trengove	Cyprus	Caretta caretta, Chelonia mydas, Dermochelys coriacea, Eretmochelys imbricata
I-Jiunn Cheng	China, Taiwan, Province of China	Caretta caretta
Imed Jribi	Tunisia	Caretta caretta, Chelonia mydas, Eretmochelys imbricata
Imre Esser	Bonaire	Caretta caretta
Iñaki Abella Gutierrez	Costa Rica	Chelonia mydas, Dermochelys coriacea, Eretmochelys imbricata
Inaky Iturbe	Mexico	Dermochelys coriacea
Ingrid Yañez	Costa Rica	Caretta caretta
INTEC	Dominican Republic	Chelonia mydas, Dermochelys coriacea, Eretmochelys imbricata, Lepidochelys olivacea
Irene Kelly	Japan	Caretta caretta, Chelonia mydas, Dermochelys coriacea, Eretmochelys imbricata
Isabel Silva	Mozambique	Eretmochelys imbricata
Isaias Majil	Belize	Chelonia mydas, Eretmochelys imbricata
ISEMAR	Mexico	Caretta caretta, Chelonia mydas, Eretmochelys imbricata
Israel Llamas Gonzalez	Mexico	Eretmochelys imbricata
IUCN NL	Suriname	Dermochelys coriacea, Lepidochelys olivacea
Jacinto Rodriguez	Panama	Dermochelys coriacea, Eretmochelys imbricata
Jacques Fretey	Cote D'Ivoire, Equitorial Guinea, Guinea, Senegal	Caretta caretta, Chelonia mydas, Dermochelys coriacea, Eretmochelys imbricata, Lepidochelys olivacea
Jaime Pérez	Guatemala	Eretmochelys imbricata
James Gumbs	Anguilla	Dermochelys coriacea
James Bali	Malaysia	Chelonia mydas, Dermochelys coriacea, Eretmochelys imbricata
James Richardson	Antigua and Barbuda	Eretmochelys imbricata
Janet Gibson	Belize	Chelonia mydas, Dermochelys coriacea, Eretmochelys imbricata
Janice Blumenthal	Cayman Islands	Caretta caretta, Chelonia mydas, Eretmochelys imbricata
Jaqueline Castilhos	Brazil	Caretta caretta, Chelonia mydas, Eretmochelys imbricata
Jean Wiener	Haiti	Caretta caretta, Chelonia mydas, Dermochelys coriacea, Eretmochelys imbricata, Lepidochelys olivacea
Jean-claude Nicolas	Martinique	Caretta caretta, Chelonia mydas, Dermochelys coriacea, Eretmochelys imbricata
Jeanne A. Mortimer	Anguilla, British Indian Ocean Territory, Seychelles	Dermochelys coriacea, Eretmochelys imbricata
Jen Beggs	Barbados	Chelonia mydas, Dermochelys coriacea, Eretmochelys imbricata
Jennifer Cruce	Micronesia, Federated States of	Chelonia mydas, Dermochelys coriacea, Eretmochelys imbricata
Jennifer Gray	Bermuda	Chelonia mydas, Eretmochelys imbricata
Jereme Phillips	United States	Caretta caretta
Jérome Bourjea	France, Madagascar	Caretta caretta
Jessica Berkel	Sint Eustatius	Eretmochelys imbricata
Jesús Tomás	Dominican Republic	Chelonia mydas, Dermochelys coriacea, Eretmochelys imbricata
Jim Spotila	Costa Rica	Chelonia mydas, Dermochelys coriacea, Eretmochelys imbricata
Joao Carlos Thome	Brazil	Dermochelys coriacea
Johanna Segovia	El Salvador	Caretta caretta, Chelonia mydas, Dermochelys coriacea, Eretmochelys imbricata, Lepidochelys olivacea
John Jeffers	Montserrat	Chelonia mydas, Dermochelys coriacea, Eretmochelys imbricata, Lepidochelys olivacea
Joni Solomon	Cayman Islands	Caretta caretta, Chelonia mydas, Eretmochelys imbricata
José Antonio Trejo Robles	Mexico	Caretta caretta, Chelonia mydas, Eretmochelys imbricata
Jose Barron Hernandez	Mexico	Dermochelys coriacea, Lepidochelys olivacea
José Gomez Peñate	Cote D'Ivoire	Dermochelys coriacea, Lepidochelys olivacea
José Urteaga	Nicaragua	Dermochelys coriacea
Joséa S. Dossou-Bodjrènou	Benin	Dermochelys coriacea, Eretmochelys imbricata, Lepidochelys olivacea
Joshua Eberdong	Palau	Dermochelys coriacea
Juan Carlos Figuera	Venezuela	Eretmochelys imbricata
Juan Patiño Martinez	Colombia, Panama	Caretta caretta, Chelonia mydas, Dermochelys coriacea, Eretmochelys imbricata
Judith Garland-Campbell	Turks and Caicos Islands	Dermochelys coriacea, Eretmochelys imbricata
Jules Ngunguim	Cameroon	Caretta caretta, Chelonia mydas, Eretmochelys imbricata
Julia Azanza	Cuba	Eretmochelys imbricata
Julia Horrocks	Barbados	Caretta caretta, Chelonia mydas, Dermochelys coriacea, Eretmochelys imbricata
Julie Garnier	Mozambique	Chelonia mydas, Dermochelys coriacea, Eretmochelys imbricata
Juney Ward	Samoa	Chelonia mydas, Eretmochelys imbricata
Justin Gerlach	Honduras, Seychelles	Eretmochelys imbricata
Kalli De Meyer	Bonaire	Caretta caretta, Chelonia mydas, Dermochelys coriacea, Eretmochelys imbricata
Karen Bjorndal	Bahamas	Chelonia mydas, Dermochelys coriacea, Eretmochelys imbricata
Karen Oceguera Camacho	Mexico	Eretmochelys imbricata
Kartik Shanker	India	Dermochelys coriacea, Lepidochelys olivacea
Kate Orchard	Saint Kitts and Nevis	Dermochelys coriacea, Eretmochelys imbricata
KAWAN Association	Martinique	Chelonia mydas, Dermochelys coriacea, Eretmochelys imbricata
Kellie Pendoley	Australia	Dermochelys coriacea, Eretmochelys imbricata
'Kelvin García Sanabria	Venezuela	Eretmochelys imbricata, Natator depressus
Kenneth Mackay	Vanuatu	Caretta caretta, Chelonia mydas, Dermochelys coriacea, Eretmochelys imbricata
Ketut Sarjana Putra	Indonesia	Dermochelys coriacea
Kevin Jolliffe	Seychelles	Chelonia mydas, Dermochelys coriacea, Eretmochelys imbricata
Kimberly Stewart	Saint Kitts and Nevis	Chelonia mydas, Eretmochelys imbricata
Kimberly Woody	Virgin Islands, U. S.	Chelonia mydas, Dermochelys coriacea, Eretmochelys imbricata
Kirstin Dobbs	Australia	Caretta caretta, Chelonia mydas, Dermochelys coriacea, Eretmochelys imbricata
La Tortuga Feliz	Costa Rica	Eretmochelys imbricata
Lachlan Barker	Australia	Dermochelys coriacea
L'Association Eco-Lambda	Guadeloupe	Caretta caretta, Chelonia mydas
Laurent Malglaive	Guadeloupe	Eretmochelys imbricata
Laurent Kelle	French Guiana	Dermochelys coriacea, Eretmochelys imbricata
Lee Munson	Sint Eustatius	Chelonia mydas, Dermochelys coriacea, Eretmochelys imbricata, Lepidochelys olivacea
Lesbia Montero	Puerto Rico	Chelonia mydas, Dermochelys coriacea, Eretmochelys imbricata
Lidia Salinas	Honduras	Dermochelys coriacea, Eretmochelys imbricata
Liliana Quiñones	Colombia	Caretta caretta, Chelonia mydas, Eretmochelys imbricata
Lily Venizelos	Lebanon, Libyan Arab Jamahiriya, Tunisia	Dermochelys coriacea, Eretmochelys imbricata
Linda Vanherck	Seychelles	Caretta caretta, Chelonia mydas
Lorna Slade	Turks and Caicos Islands	Eretmochelys imbricata
Luciano Soares	Brazil	Caretta caretta, Chelonia mydas, Eretmochelys imbricata
Lucine Edwards	Saint Vincent and the Grenadines	Caretta caretta, Chelonia mydas, Dermochelys coriacea, Eretmochelys imbricata, Lepidochelys olivacea
Luis Felipe Lopez Jurado	Cape Verde	Caretta caretta, Chelonia mydas, Dermochelys coriacea, Eretmochelys imbricata
M. Gaskin Pointe-a-Pierre Wild Fowl Trust	Trinidad and Tobago	Caretta caretta
M. Zahirul Islam	Bangladesh	Eretmochelys imbricata
Maartje Hilterman	Suriname	Caretta caretta, Chelonia mydas, Dermochelys coriacea, Lepidochelys olivacea
Mabel Nava	Bonaire	Dermochelys coriacea, Eretmochelys imbricata
Maggie Muurmans	Indonesia	Caretta caretta, Chelonia mydas, Dermochelys coriacea, Eretmochelys imbricata
Mahta Goitom	Eritrea	Chelonia mydas, Dermochelys coriacea, Eretmochelys imbricata
Mairie de SAINTE-ANNE	Martinique	Eretmochelys imbricata
MAIRIE du DIAMANT	Martinique	Eretmochelys imbricata
Malama Momoemausu	Samoa	Chelonia mydas, Dermochelys coriacea, Eretmochelys imbricata
Manish Chandi	India	Eretmochelys imbricata
Marco Herrera	Ecuador, Mexico	Dermochelys coriacea, Eretmochelys imbricata
Marco Tena Espinoza	Mexico	Chelonia mydas, Dermochelys coriacea, Eretmochelys imbricata, Lepidochelys olivacea
Marea Azul	Mexico	Dermochelys coriacea, Lepidochelys olivacea
Maria Angela Marcovaldi	Brazil	Dermochelys coriacea, Lepidochelys olivacea
María José Barragán	Ecuador	Caretta caretta, Chelonia mydas, Dermochelys coriacea, Eretmochelys imbricata, Lepidochelys olivacea
Mariana Malavar Montenegro	Costa Rica	Chelonia mydas, Dermochelys coriacea, Eretmochelys imbricata, Lepidochelys olivacea
Mariano Everardo Melendez	Mexico	Chelonia mydas, Dermochelys coriacea, Eretmochelys imbricata, Lepidochelys olivacea
Marie Allen	Cyprus	Dermochelys coriacea, Lepidochelys olivacea
Marie-Clelia Godgenger	Congo	Caretta caretta
Marina Fastigi	Grenada	Chelonia mydas, Dermochelys coriacea, Lepidochelys olivacea
Marino Abrego	Panama	Chelonia mydas, Dermochelys coriacea, Eretmochelys imbricata
Mark Dodd	United States	Caretta caretta, Chelonia mydas, Dermochelys coriacea, Eretmochelys imbricata, Lepidochelys olivacea
Mark Hamann	Australia, Viet Nam	Caretta caretta
Matthew Godfrey	United States	Chelonia mydas, Dermochelys coriacea, Eretmochelys imbricata, Lepidochelys olivacea, Natator depressus
Matthew Morton	Saint Lucia	Caretta caretta, Dermochelys coriacea
Mauricio Vasquez	El Salvador	Dermochelys coriacea, Eretmochelys imbricata
Mervin Hastings	Virgin Islands, British	Chelonia mydas, Dermochelys coriacea, Eretmochelys imbricata, Lepidochelys olivacea
Meylan Anne	Panama, United States	Chelonia mydas, Dermochelys coriacea, Eretmochelys imbricata
Michael Liles	El Salvador	Caretta caretta, Chelonia mydas, Dermochelys coriacea, Eretmochelys imbricata
Michel Delaguerre	France	Chelonia mydas, Dermochelys coriacea, Eretmochelys imbricata, Lepidochelys olivacea
Michelle Fernandez	Honduras	Caretta caretta
Michelle Fletcher	Vanuatu	Caretta caretta, Chelonia mydas, Eretmochelys imbricata
Michelle Kalamandeen	Guyana	Chelonia mydas, Dermochelys coriacea, Eretmochelys imbricata, Lepidochelys olivacea
Mick Guinea	Australia	Natator depressus
Mike Olendo	Kenya	Chelonia mydas, Eretmochelys imbricata
Mike Reynolds	United States	Caretta caretta
Moise Chasselas	Guadeloupe	Dermochelys coriacea, Eretmochelys imbricata
Mona Khalil	Lebanon	Caretta caretta, Chelonia mydas
Monica Aureggi	Lebanon, Thailand	Caretta caretta, Chelonia mydas, Dermochelys coriacea
Monica Lopez-Conlon	Costa Rica	Dermochelys coriacea
Monique Charrieau	Guadeloupe	Dermochelys coriacea, Eretmochelys imbricata
Murrieta Rosas Jose Luis	Mexico	Dermochelys coriacea, Lepidochelys olivacea
Myroula Hadjichristophorou	Cyprus	Caretta caretta
Nancy Gladstone	Madagascar	Caretta caretta
Naomi Doak	Seychelles	Chelonia mydas, Eretmochelys imbricata
Nariva Environmental Trust	Trinidad and Tobago	Chelonia mydas, Dermochelys coriacea, Eretmochelys imbricata, Lepidochelys olivacea
Naveen Namboothri	India	Dermochelys coriacea
Neema Nand	Fiji	Eretmochelys imbricata
Nicolas Pilcher	Oman, Papau New Guinea, Qatar, Saudi Arabia	Caretta caretta, Dermochelys coriacea, Eretmochelys imbricata
Nicole Esteban	Sint Eustatius	Chelonia mydas, Dermochelys coriacea, Eretmochelys imbricata
Norman Javier Flores	Honduras	Caretta caretta, Dermochelys coriacea
Oguz Türkozan	Turkey	Caretta caretta
Olivier Tartaglino	Guadeloupe	Dermochelys coriacea, Eretmochelys imbricata
ONF	Martinique	Eretmochelys imbricata
Pat Turpin	Trinidad and Tobago	Chelonia mydas, Dermochelys coriacea, Eretmochelys imbricata
Patricia Zarate	Ecuador	Chelonia mydas, Eretmochelys imbricata, Lepidochelys olivacea
Patrick Burchfield	Mexico	Caretta caretta, Chelonia mydas, Dermochelys coriacea, Lepidochelys kempii
Paul Hoetjes	Curacao	Caretta caretta, Chelonia mydas, Dermochelys coriacea, Eretmochelys imbricata
Paul Scholte	Venezuela	Caretta caretta, Dermochelys coriacea
Paula Sanz	Cape Verde	Caretta caretta
Paulo Barata	Brazil	Caretta caretta, Chelonia mydas, Dermochelys coriacea, Eretmochelys imbricata, Lepidochelys olivacea
Pawi Sports Culture & Eco Club	Trinidad and Tobago	Dermochelys coriacea
Pena Aldrete Vincente	Mexico	Dermochelys coriacea, Lepidochelys olivacea
PEP UPMP	Mexico	Chelonia mydas, Eretmochelys imbricata, Lepidochelys kempii, Lepidochelys olivacea
Peri Mason	Antigua and Barbuda	Chelonia mydas, Dermochelys coriacea, Eretmochelys imbricata
Perla Torres Gago	Nicaragua	Chelonia mydas, Dermochelys coriacea, Eretmochelys imbricata, Lepidochelys olivacea
Peter C.H. Pritchard	Guyana	Dermochelys coriacea, Eretmochelys imbricata
Peter Dutton	Papau New Guinea	Dermochelys coriacea
Peter Ramohia	Solomon Islands	Eretmochelys imbricata
Petro wan Smolbag	Fiji, Vanuatu	Chelonia mydas, Dermochelys coriacea, Eretmochelys imbricata
Philippe Deproft	Guadeloupe	Dermochelys coriacea, Eretmochelys imbricata
Quelnios	Mexico	Eretmochelys imbricata
Rachel Silverman	Costa Rica	Chelonia mydas, Dermochelys coriacea, Eretmochelys imbricata, Lepidochelys olivacea
Rafael Gutierrez	Honduras	Caretta caretta, Dermochelys coriacea, Eretmochelys imbricata
Rafe Boulon	Virgin Islands, U. S.	Eretmochelys imbricata
Ralph Wilkins	Saint Kitts and Nevis	Chelonia mydas, Dermochelys coriacea, Eretmochelys imbricata
Randall Arauz	Costa Rica	Chelonia mydas, Dermochelys coriacea, Eretmochelys imbricata, Lepidochelys olivacea
Ray Chatto	Australia	Eretmochelys imbricata, Natator depressus
Rebecca S. King	Grenada	Dermochelys coriacea, Eretmochelys imbricata
Renato Cruz	Philippines	Eretmochelys imbricata
René Kantún	Mexico	Caretta caretta, Chelonia mydas, Eretmochelys imbricata
Rhema Kerr Bjorkland	Jamaica	Chelonia mydas, Dermochelys coriacea, Eretmochelys imbricata
Ría LAGARTOS Reserva de la Biosfera	Mexico	Caretta caretta, Chelonia mydas, Eretmochelys imbricata
Ricardo Hernández	Venezuela	Caretta caretta, Dermochelys coriacea
Richard Van der Wal	Antigua and Barbuda, Aruba	Chelonia mydas, Dermochelys coriacea, Eretmochelys imbricata
Robert van Dam	Puerto Rico	Dermochelys coriacea, Eretmochelys imbricata
Roberto Luis Herrera Pavón	Mexico	Caretta caretta, Chelonia mydas, Eretmochelys imbricata
Roberto Solano	Costa Rica	Dermochelys coriacea, Eretmochelys imbricata
Rodney J. Galama	Papau New Guinea	Dermochelys coriacea
Roland Mau	Australia	Caretta caretta
Romeo Trono	Philippines	Eretmochelys imbricata
Ronel Nel	South Africa	Caretta caretta, Dermochelys coriacea
Rotney Piedra Chacón	Costa Rica	Dermochelys coriacea, Eretmochelys imbricata
Rowan Byrne	Dominica	Chelonia mydas, Dermochelys coriacea, Eretmochelys imbricata
Rozenn Le Scao	Martinique	Chelonia mydas, Dermochelys coriacea, Eretmochelys imbricata
Ruben Venegas	Costa Rica	Eretmochelys imbricata
Rudy van der Elst	Mozambique	Caretta caretta, Dermochelys coriacea
Samuel Narciso	Venezuela	Eretmochelys imbricata
Sandra Viejobueno	Costa Rica	Caretta caretta
Sandrine Bonotto	Guadeloupe	Chelonia mydas, Dermochelys coriacea, Eretmochelys imbricata, Lepidochelys olivacea
San-Marie Jolliffe	Seychelles	Dermochelys coriacea, Eretmochelys imbricata
Sapodilla Cayes Marine Reserve	Belize	Chelonia mydas, Eretmochelys imbricata
Sarah Klain	Palau	Eretmochelys imbricata
Scott Eckert	Trinidad and Tobago	Eretmochelys imbricata
Sebastian Troëng	Costa Rica	Chelonia mydas, Dermochelys coriacea, Eretmochelys imbricata, Lepidochelys olivacea
Sebastien Rives	Guadeloupe	Caretta caretta, Dermochelys coriacea, Eretmochelys imbricata
SEMARNAT	Mexico	Dermochelys coriacea, Eretmochelys imbricata
Serap Ergene	Turkey	Caretta caretta, Chelonia mydas, Eretmochelys imbricata, Lepidochelys kempii, Lepidochelys olivacea
Seth Stapleton	Dominica	Caretta caretta
Séverine Raigné	Martinique	Chelonia mydas, Dermochelys coriacea, Eretmochelys imbricata
Shakira Azan	Jamaica	Chelonia mydas, Dermochelys coriacea, Eretmochelys imbricata
Shannon Gore	Virgin Islands, British	Eretmochelys imbricata
Sophie Guilloux	Guadeloupe	Chelonia mydas, Dermochelys coriacea, Eretmochelys imbricata
South Water Caye Marine Reserve	Belize	Dermochelys coriacea, Eretmochelys imbricata
Stéphane Ciccione	France, Madagascar	Eretmochelys imbricata
Stephen Dunbar	Honduras	Eretmochelys imbricata
Stephen Durand	Dominica	Lepidochelys olivacea
Stephen Poon	Trinidad and Tobago	Chelonia mydas, Dermochelys coriacea, Eretmochelys imbricata
Steve Garner	Virgin Islands, U. S.	Chelonia mydas, Dermochelys coriacea, Eretmochelys imbricata, Lepidochelys olivacea
STINASU	Suriname	Chelonia mydas, Dermochelys coriacea, Eretmochelys imbricata
Stuart Wynne	Anguilla	Dermochelys coriacea, Eretmochelys imbricata
Sukarno Wagiman	Malaysia	Chelonia mydas, Dermochelys coriacea, Eretmochelys imbricata
Sükran Yalçin-Özdilek	Turkey	Eretmochelys imbricata
Suzanne Livingstone	Trinidad and Tobago	Caretta caretta
Tamar Ron	Angola	Dermochelys coriacea, Eretmochelys imbricata
Tamra Chapman	Australia	Dermochelys coriacea, Lepidochelys olivacea
Tecle Mengstu	Eritrea	Caretta caretta
Teodora Casildo	Honduras	Caretta caretta, Dermochelys coriacea
Thakoorie Boodoo	Trinidad and Tobago	Chelonia mydas, Dermochelys coriacea, Eretmochelys imbricata
The Nature Conservancy	Jamaica, Virgin Islands, U. S.	Chelonia mydas, Eretmochelys imbricata
Thierry Guthmuller	Guadeloupe	Dermochelys coriacea, Eretmochelys imbricata
Toco Foundation	Trinidad and Tobago	Dermochelys coriacea, Eretmochelys imbricata
Toledo Institute for Development and Environment	Belize	Eretmochelys imbricata
Tonya Clovis	Trinidad and Tobago	Chelonia mydas, Dermochelys coriacea, Eretmochelys imbricata
Tricia Lovell	Antigua and Barbuda	Chelonia mydas, Dermochelys coriacea, Eretmochelys imbricata
UAC	Mexico	Chelonia mydas, Eretmochelys imbricata
UNACAR	Mexico	Chelonia mydas, Eretmochelys imbricata, Lepidochelys kempii
University Of Belize	Belize	Eretmochelys imbricata
US Fish and Wildlife Service	Puerto Rico	Eretmochelys imbricata
USVI Department of Fish & Wildlife	Virgin Islands, U. S.	Chelonia mydas, Dermochelys coriacea, Eretmochelys imbricata
Vagi Rei	Antigua and Barbuda	Chelonia mydas, Dermochelys coriacea, Eretmochelys imbricata
Vicente Guzman	Mexico	Chelonia mydas, Dermochelys coriacea, Eretmochelys imbricata, Lepidochelys kempii, Lepidochelys olivacea
Vicky Taylor	Costa Rica	Eretmochelys imbricata
Victorio Diaz Millan	Mexico	Dermochelys coriacea, Lepidochelys olivacea
Vincent Vera	Venezuela	Caretta caretta, Chelonia mydas, Dermochelys coriacea, Eretmochelys imbricata
Vivian Páez	Colombia	Dermochelys coriacea, Eretmochelys imbricata
Wagner Quiros	Costa Rica	Chelonia mydas, Dermochelys coriacea, Lepidochelys olivacea
Wayne John Fuller	Cyprus	Caretta caretta
Wayne Sentman	Micronesia, Federated States of	Chelonia mydas, Eretmochelys imbricata
Wilfredo Lopez	El Salvador	Chelonia mydas, Dermochelys coriacea, Eretmochelys imbricata, Lepidochelys olivacea
William Coles	Virgin Islands, U. S.	Dermochelys coriacea
Xavier Delloue	Guadeloupe	Dermochelys coriacea, Eretmochelys imbricata
Yakup Kaska	Turkey	Caretta caretta
Yaniv Levy	Israel	Caretta caretta
Yohannes Teclemariam	Eritrea	Eretmochelys imbricata
Yolanda León	Dominican Republic	Caretta caretta, Chelonia mydas, Dermochelys coriacea, Eretmochelys imbricata
Yoshi Matsuzawa	Japan	Caretta caretta, Eretmochelys imbricata
Zandy Hillis-Starr	Virgin Islands, U. S.	Caretta caretta, Chelonia mydas, Dermochelys coriacea, Eretmochelys imbricata
Zuemy Rangel Gonzalez	Mexico	Dermochelys coriacea, Lepidochelys olivacea
Zunilda Baldonado	Colombia	Caretta caretta, Chelonia mydas, Dermochelys coriacea, Eretmochelys imbricata
