# Supplementary material for: Regional Management Units for Marine Turtles: A Novel Framework for Prioritizing Conservation and Research across Multiple Scales
Source: PLoS One. 2010 Dec 17;5(12):e15465. doi: 10.1371/journal.pone.0015465 (PMC3003737; doi:10.1371/journal.pone.0015465)
Supplement: Appendix S2 — Metadata associated with each layer synthesized to generate Regional Management Units. (XLS) [file pone.0015465.s003.xls]

## Sheet: global_distributions
Species	Citations
Cc	Dodd (1988). Synopsis of the biological data on the loggerhead sea turtle Caretta caretta (Linnaeus 1758). U.S. Fish and Wildlife Service biological report 88(14). 110 pp.; SWOT Report - The State of the World's Sea Turtles, Vol 2., (2006) 49 p.; Nichols (2007) Loggerhead sea turtle (Caretta caretta) 5-year review: summary and evaluation. National Marine Fisheries Service and US Fish and Wildlife…
Cm	Marquez (1990). Sea turtles of the world. FAO fisheries Synopsis. Volume 11, No. 125.; WIDECAST. 2009. Basic biology of the green turtle, WIDECAST network. Online at http://www.widecast.org/Biology/Green.html.; Hirth (1997) Synopsis of the biological data on the green turtle Chelonia mydas (Linnaeus 1758) U.S. Fish and Wildlife Service, biological report, 120 p; Seminoff (assessor) (2004) Global …
Dc	Eckert et al. (2009). Synopsis of the biological data on the leatherback sea turtle Dermochelys coriacea (Vandelli, 1761). U.S. Fish and Wildlife Service agency report. 183 pp.; SWOT Report - The State of the World's Sea Turtles, Vol 1., (2005) 37 p.; Tiwari (2007) Leatherback turtle (Dermochelys coriacea) five-year review. National Marine Fisheries Service & US Fish and Wildlife Service, Jackson…
Ei	Witzell (1983) Synopsis of biological data on the hawksbill turtle, Eretmochelys imbricata (Linnaeus, 1766). FAO Fisheries Synopsis 137, 78 p.; Marquez (1990). Sea turtles of the world. FAO fisheries Synopsis. Volume 11, No. 125.; SWOT Report - The State of the World's Sea Turtles, Vol 3., (2007) 43 p.; Mortimer and Donnelly (2007) IUCN Red List Status Assessment: hawksbill turtle (Eretmochelys i…
Lk	Marquez (1990). Sea turtles of the world. FAO fisheries Synopsis. Volume 11, No. 125.; Wibbels (2007) Kemp's ridley sea turtle (Lepidochelys kempii) five-year review: summary and evaluation, NMFS & USFWS, Jacksonville, FL, USA, 50p.; Witt et al. (2007) Spatio-temporal patterns of juvenile marine turtle occurrence in waters of the European continental shelf. Marine Bioolgy 151:873-885; SWOT Report…
Lo	Marquez (1990). Sea turtles of the world. FAO fisheries Synopsis. Volume 11, No. 125.; SWOT Report - The State of the World's Sea Turtles, Vol 5., (2010) 56 p.; Abreu-Grobois and Plotkin (2007) IUCN Red List Status Assessment of the olive ridley sea turtle (Lepidochelys olivacea). IUCN/SSC-Marine Turtle Specialist Group, 39 pp; Plotkin (2007) Olive ridley sea turtle (Lepidochelys olivacea) five-y…
Nd	Limpus (2007) A Biological Review of Australian Marine Turtles. 5. Flatback Turtle Natator depressus (Garman), The State of Queensland. Environmental Protection Agency; SWOT Report - The State of the World's Sea Turtles, Vol 4., (2009) 49 p.

## Sheet: mtDNA_metadata
mtdnaid	species	ocean basin	ocean region 1	ocean region 2	mtDNA stock	rmuid	nDNA Stock Contained within	sites sampled	population size estimate (text)	population size estimate (number)	population trend (text)	recent population trend	long-term population trend	geographic boundaries of mtDNA stock	citations (code corresponds to EndNote bibliography)
mtdna01	Lepidochelys olivacea	Atlantic	West		Atlantic	rmu02, rmu05	ndna01	Sergipe, Brazil (Pirambu, Punta dos Mangues, Abais); Adonga, Orango National Park, Bijagos Archipelago, Guinea Bissau; Eilanti Beach, Galibi Nature Reserve, Suriname	6440	6440		unknown (increasing Brasil and Suriname)	unknown (increasing Brasil and Suriname)	Surinam south to Sergipe, northwest across Atlantic to Guinea Bissau	Reichart1993; Bowen1998; Fernandes2004; Abreu2007; Dow2007; Plotkin 2007a; Plotkin2007b Kelle2009
mtdna02	Lepidochelys olivacea	Pacific	East	Baja California Sur	Baja California Sur, Mexico	rmu01		Las Tinajas, San Cristobal, Punta Colorada and Punta Arena, Baja California Sur, Mexico	unquantified	-9999		unknown	unknown	Southern tip of the Baja Peninsula	Lopez-Castro2005; Abreu2007; Plotkin2007a; Plotkin2007b
mtdna03	Lepidochelys olivacea	Pacific	East	Mexico to Peru	Eastern Pacific	rmu01, mru09		La Gloria, Puerto Arista, El Verde Camacho, Piedra de Tlalcoyunque, Santuario Playa de Escobilla, Mexico; Nancite and Ostional, Pacific Costa Rica; Playa Palmera, Isla Gorgona, Colombia	335,000 (Ostional); >1,169,995 (Escobilla)	1500000		decreasing	decreasing	Ceuta, Mexico south to Ecuador	Bowen1998; Briseno-Duenas1998; Lopez-Castro2005; Abreu2007; Plotkin2007a; Plotkin2007b; Camacho2008
mtdna04	Lepidochelys olivacea	Indian	Southeast		India-Western Pacific	rmu03, rmu04		Kijal and Paka, Malaysia; southwestern coast of Sri Lanka (used Kosgoda as no specific site given)	3900	3900		unknown	unknown	Sri Lanka east across SE Asia	Bowen1998; Abreu2007; Plotkin2007a; Plotkin2007b; Whiting2007a; Whiting2007b; Limpus2008c
mtdna05	Lepidochelys olivacea	Indian	Northeast		Orissa, India	rmu07		Devi River mouth, Rushikulya, Gahirmatha, Orissa, india	176000	176000		decreasing	decreasing	Gahirmatha, Rushikulya, Devi Rivers, Kalingapatnam, Srikakulam, and Srikurmam	Bowen1998; Shanker2004; Shanker2006; Abreu2007; Plotkin2007a; Plotkin2007b
mtdna06	Eretmochelys imbricata	Atlantic	West	Antigua	Antigua	rmu10		Jumby Bay (Pasture Bay Beach), Antigua	52	52	increasing	increasing	unknown	Jumby Bay	Bass1996; Bass1999; Dow2007; Mortimer2007a; Mortimer2007b
mtdna07	Eretmochelys imbricata	Atlantic	West	US Virgin Islands	US Virgin Islands	rmu10		Buck Island Reef National Monument, St. Croix, USVI	56	56	increasing	increasing	unknown	Buck Island Reef National Monument, St. Croix	Bass1996; Bass1999; Diaz-Fernandez1999; Dow2007; Mortimer2007a; Mortimer2007b
mtdna08	Eretmochelys imbricata	Atlantic	West	Puerto Rico	Puerto Rico	rmu10		Mona Island, Puerto Rico	199-332	267	increasing	increasing	unknown	Mona Island	Bass1996; Bass1999; Dow2007; Mortimer2007a; Mortimer2007b
mtdna09	Eretmochelys imbricata	Atlantic	West	Yucatan	Yucatan, Mexico	rmu10		Isla Holbox, Yucatan, Mexico	534-891	713	increasing	increasing	unknown	Isla Holbox	Bass1996; Bass1999; Diaz-Fernandez1999; Abreu-Grobois2003; Dow2007; Mortimer2007a; Mortimer2007b
mtdna10	Eretmochelys imbricata	Atlantic	West	Cuba	Cuba	rmu10		Cayerfa de Doce Leguas, Cuba	400-833	617	unknown	unknown	decreasing	Doce Leguas Cays	Diaz-Fernandez1998; Republic of Cuba 1997; Bass1996; Bass1999; Dow2007; Mortimer2007a; Mortimer2007b
mtdna11	Eretmochelys imbricata	Atlantic	West	Belize	Belize	rmu10		Gale's Point, Belize	20668	20668	decreasing	decreasing	decreasing	Gales Point	Bass1996; Bass1999; Dow2007; Mortimer2007a; Mortimer2007b
mtdna12	Eretmochelys imbricata	Atlantic	Southwest		Brazil	rmu15		Bahia, Brazil (used generalized site)	350-585	470	increasing	increasing	decreasing; 80%/105 yrs	northern Bahia and Sergipe	Bass1996; Lara-Ruiz2006; Dow2007;Marcovaldi2007; Mortimer2007a; Mortimer2007b
mtdna13	Eretmochelys imbricata	Atlantic	West	Costa Rica	Costa Rica	rmu10		Tortuguero, Costa Rica	10	10	decreasing	decreasing	decreasing; 80% since 1950's	Tortuguero	Troeng2005; Bowen2007; Dow2007; Mortimer2007a; Mortimer2007b
mtdna14	Eretmochelys imbricata	Indian	Southwest		Seychelles and Chagos Islands	rmu18		Granitics (represented by Bird Island), Amirantes, and Ile Plate Seychelles; Diego Garcia, Peros Banhos, Salomon Atoll, Chagos Islands. British Indian Ocean Territory	1,725-2,125	1925	decreasing	decreasing	decreasing	unclear (due to small sample size)	Mortimer1999; Mortimer2007a; Mortimer2007b
mtdna15	Eretmochelys imbricata	Atlantic	East		Sao Tome and Principe	rmu11		Sao Tome and Principe (used Sao Tome as site); Bioko Island, Equatorial Guinea	21-34	23	decreasing	decreasing	decreasing	Sao Tome and Principe; Bioko Island, Equatorial Guinea	Godenger2008; Fretey2001; Rader2006; Abreu2007; Mortimer2007; Mortimer2007a; Mortimer2007b; Weir2008;
mtdna16	Eretmochelys imbricata	Indian	Southeast		Western Australia	rmu14	ndna03	Varanus Island and Rosemary Island Australia	2000	2000	unknown	unknown	unknown	Pilbara, Varunus Island, and Rosemary Island	Broderick1994; Broderick1996; Mortimer2007a; Mortimer2007b; Limpus2009a
mtdna17	Eretmochelys imbricata	Pacific	West Pacific/SE Asia	Peninsular Malaysia	Peninsular Malaysia	rmu22		Terengganu, Peninsular Malaysia	50-85	68	unknown	unknown	decreasing	Melaka	Broderick1996; Mortimer2007a; Mortimer2007b
mtdna18	Eretmochelys imbricata	Indian	Northwest	Arabian Peninsula	Arabian Peninsula	rmu17		Saudi Arabia (used Jana Island as site)	1,275-2,065	1670	unknown	unknown	unknown	Saudi Arabia, Iran and Oman	Broderick1996; Mortimer2007a; Mortimer2007b
mtdna19	Eretmochelys imbricata	Indian	Northwest	Red Sea	Red Sea	rmu17		Eritrea (used Mojeidi Island as site), Saudi Arabia (used Kurayn Island as site), Egypt (Beaches between Rhafa and Port Said)	150-300	225	unknown	unknown	decreasing (in Egypt)	Eritrea (used Mojeidi Island as site), Saudi Arabia (used Kurayn Island as site), Egypt (Beaches between Rhafa and Port Said)	Abreu2007; Mortimer2007a; Mortimer2007b
mtdna20	Eretmochelys imbricata	Pacific	Southwest	Northeastern Australia	Northeastern Australia	rmu12	ndna02	Milman Island, Northeast Arnhem Land, Clack Reef, Australia	6500	6500	decreasing	decreasing	unknown	Torres Strait to Great Barrier Reef	Broderick1994; Broderick1996; Mortimer2007a; Mortimer2007b; Limpus2009a
mtdna21	Eretmochelys imbricata	Pacific	West Pacific/SE Asia	Sabah	Sabah, Malaysia	rmu22		Beaches of the Sabah Turtle Islands, Malaysia	69-116	93	stable	stable	unknown	Turtle Islands	Broderick1996; Mortimer2007a; Mortimer2007b
mtdna22	Eretmochelys imbricata	Pacific	Southwest	Solomon Islands	Solomon Islands	rmu12		Kerehikapa Island, The Solomons	200-300	250	decreasing	decreasing	decreasing	Kerehikapa Island	Broderick1996; Parmenter1983; Bell2000; Mortimer2007a; Mortimer2007b; Limpus2009a
mtdna23	Eretmochelys imbricata	Atlantic	West	Barbados West	Barbados West	rmu10		West Coast Beaches	316 Islandwide (1997); 2016 Islandwide (2004)	316	increasing	increasing	decreasing	between Speightstown and Dover, Barbados (leeward beaches)	Bass1996; Bass1999; Browne2009; Beggs2007; Dow2007 Mortimer2007a; Mortimer2007b
mtdna24	Eretmochelys imbricata	Atlantic	West	Barbados East	Barbados East	rmu10		East Coast Beaches	316 Islandwide (1997); 2016 Islandwide (2004)	316	increasing	increasing	decreasing	Bath, Barbados (windward beaches)	Bass1996; Bass1999; Dow2007; Mortimer2007a; Mortimer2007b; Browne2009
mtdna26	Caretta caretta	Atlantic	Northwest	Northern Florida-North Carolina	Northern Florida-North Carolina	rmu25	ndna04	North Carolina: Bald Head Island, Cape Lookout, Topsail Beach, Camp Lejuene, Caswell Beach; South Carolina: Cape Romain; Georgia: Cumberland Island, Little Cumberland Island; Florida: Amelia Island (Nassau County), Jacksonville Beach (Duval County), Guana River (Flagler County)	ca.1288	1288	- 1.9%/yr NC/SC/GA, SC alone - 3.1%/yr 1980-2002 (decreasing designation taken from Florida FWC: http://research.myfwc.com/images/articles/10690/20091012_092756_30937.jpg)	decreasing	unknown	North Carolina/Virginia border through northeastern Florida	Bowen1994; Encalada1998; Bowen2005; Dow2007; Nichols2007; NMFS2009; Conant2009
mtdna27	Caretta caretta	Atlantic	Northwest	Southern Florida	Southern Florida	rmu25	ndna04	Southern Florida: Melbourne Beach (Brevard County), Hutchinson Island (St. Lucie County), Port Everglades (Broward), Key Island (Sarasota County)	ca. 16365	16365	- 37% 1989-2007 (decreasing designation taken from Florida FWC: http://research.myfwc.com/images/articles/10690/20091012_092756_30937.jpg)	decreasing	unknown	south of Volusia County Florida on east coast through Pinellas County on the west coast of Florida	Bowen1994; Encalada1998; Bowen2005; Dow2007; Nichols2007; NMFS2009; Conant2009
mtdna28	Caretta caretta	Atlantic	Northwest	Dry Tortugas	Dry Tortugas	rmu25	ndna04	Dry Tortugas Island (Monroe County)	ca. 62	62	stable (trend designation taken from Florida FWC: http://research.myfwc.com/images/articles/10690/20091012_092756_30937.jpg)	stable	unknown	Dry Tortugas Island	Pearce2001a; Pearce2001b; Bowen2005; Dow2007; Nichols2007; NMFS2009; Conant2009
mtdna29	Caretta caretta	Atlantic	Northwest	Northwestern Florida/Gulf States	Northwestern Florida/Gulf States	rmu25	ndna04	Northwest Forida, northern Gulf of Mexico: Eglin Air Force Base (Okaloosa County), Panama City and Tyndall Beach (Bay County), Apalachicola (Franklin County), areas adjacent to St. George and St. Joseph (Hillsborough County)	ca. 228	228	-6.8%/yr 1995-2005*	decreasing	unknown	North of Pinellas County, Florida through Texas	Bowen1994; Encalada1998; Bowen2005; Dow2007; Nichols2007; NMFS2009; Conant2009
mtdna30	Caretta caretta	Atlantic	Northwest	Yucatan	Yucatan	rmu25		Quintana Roo, Mexico (Used X'Cacel as site)	ca. 225-583	404	unknown	unknown	unknown	northeastern coast of Yucatan Peninsula, from Cabo Catoche and Isla Contoy to Ascencion Bay, including Isla Cozumel and Boca Paila	Encalada1998; TEWG2000; Dow2007; Nichols2007; NMFS2009; Conant2009
mtdna31	Caretta caretta	Atlantic	Southwest		Brazil	rmu25	ndna05	Bahia, Brazil (used generalized site)	>1237	1237	6.4%/yr Bahia, + 1.9%/yr Espiritu Santo 1988-2003	increasing	unknown	from northern Sergipe to northern Bahia; Bahia to southern Rio de Janiero	Bowen1994; Encalada1998; Soares2004; Bowen2005; Marcovaldi2007; Nichols2007; Caraccio2008; NMFS2009; Conant2009; Reis2009
mtdna32	Caretta caretta	Atlantic	Northeast		Cape Verde	rmu23		Boa Vista, Maio and Sal Vicente (unknown site, none used)	2000	2000	unknown, probably declining	decreasing	unknown	Boa Vista, Sal, Maio and Sal Vicente	Lopez-Jurado2000; Lopez-Jurado2007; Nichols2007; Conant2009
mtdna33	Caretta caretta	Mediterranean		Turkey	Turkey	rmu26	ndna07	Daylan beach and Belek beach	ca. 500	500	- 5%/yr 1993-2005 in western turkey*	decreasing	unknown	Daylan beach and Belek beach	Laurent1998; Schroth1996; Broderick2002; Margaritoulis2003; Nichols2007; Carreras2007
mtdna34	Caretta caretta	Mediterranean		Israel	Israel	rmu26	ndna07	entire coast of Israel	ca. 8	8	unknown	unknown	unknown	entire coast of Israel	Broderick et al. 2002; Margaritoulis2003; Carreras2007; Nichols2007; Conant2009
mtdna35	Caretta caretta	Indian	Southeast		Western Australia	rmu29	ndna09	Shark Bay and Dirk Hartog Island; Ningaloo Coast; Northwest Cape; Muiron Islands	1000-2000	1500	unknown, thought to be depleted before surveys started	unknown	unknown	Sharks Bay world heritage area northward though Ningaloo Marine Park to the Northwest Cape and to nearby Muiron Islands	FitzSimmons1996a; Limpus2003; Nichols2007; Limpus2008b; Conant2009
mtdna36	Caretta caretta	Pacific	South		Eastern Australia/New Caledonia	rmu30	ndna10	Mon Repos, Swain Reefs, Wreck Island, Wreck Rock, Australia; La Roche Percee, New Caledonia	560-570	565	Wongarra = fluctuating, Wreck Island = declining over past 20 years	decreasing	decreasing	from South Stradbroke Island to Bustard Head, on islands of Capricorn Bunker Group and Swain Reefs and on Bushy Island; New Caledonia	Bowen1994; Bowen1995; FitzSimmons1996a; Chaloupka2001; Limpus2003; Chaloupka2004; Nichols2007; Chaloupka2008; Limpus2008b; Boyle2009
mtdna37	Caretta caretta	Indian	Northwest		Oman	rmu27		Masirah Island, Oman	>25000	25000	unknown	unknown	unknown	mainland beaches south of Masirah Island to Oman; Yemen Island, Masirah and al Halaniyat Islands, Oman; Socotra, Yemen	Baldwin2003; Nichols2007; Conant2009
mtdna38	Caretta caretta	Indian	Southwest		South Africa	rmu28		Kwazulu Natal, South Africa	>500	500	increasing (Tongaland data only)	increasing	increasing	Kwazulu Natal, South Africa	Hughes1974; Bowen1994; Baldwin2003; Nel2005; Nel2006; Papillon2007; Nichols2007; Nel2008; Conant2009
mtdna39	Caretta caretta	Pacific	North		Fukiagehama	rmu31		Fukiagehema Beach, Yakushima Island (unable to locate site), Miyazaki Beach, Minabe Beach	>1000	1000	increasing	increasing	decreasing	Fukiagehema Beach, Yakushima Island, Miyazaki Beach, Minabe Beach	Bowen1994; Hatase2002; Kamezaki2003; Chaloupka2004; Nichols2007; Chaloupka2008; Conant2009; Kamezaki(in press)
mtdna43	Caretta caretta	Mediterranean		Greece/Ionian islands	Greece/Ionian islands	rmu26	ndna07	Zakynthos	ca. 623	623	unknown due to annual fluctuation	unknown	unknown	western and southern coasts of the Greek and Ionian Islands, including Zakynthos and Kyparissia	Bowen1994; Encalada1998; Laurent1998; Schroth1996; Broderick2002; Margaritoulis2003; Carreras2007; Nichols2007; Conant2009
mtdna45	Chelonia mydas	Pacific	North Central		Hawaii	rmu35	ndna27	French Frigate Shoals, Hawai'i	574	574	increasing	increasing	increasing	French Frigate Shoals, Hawai'i	Balazs2004; Seminoff2004; Chaloupka2007; Seminoff2007; Dutton2008
mtdna46	Chelonia mydas	Atlantic	Southwest	Atol las Rocas-Fernando de Noronha	Atol las Rocas-Fernando de Noronha	rmu49	ndna18	Atol das Rocas, Fernando de Noronha	100-200	100	unknown	unknown	unknown	Atol Las Rocas, Fernando de Noronha Brazil	Bowen1992; Moreira1995; Bellini1996; Broderick2001b; Godley2001; Grossman2001; Seminoff2004; Caraccio2005; Bjorndal2006; Broderick2006; Moreira2006; Dow2007; Naro-Maciel2007; Seminoff2007; Proietti2009
mtdna47	Chelonia mydas	Pacific	West Pacific/SE Asia	Berau	Berau	rmu41		Berau Islands (Sangalaki Is), Northeast Kalimantan, Indonesia	4000-5000	4500	unknown	unknown	decreasing	Berau Islands (Sangalaki Is), Northeast Kalimantan, Indonesia	Schulz1984; Seminoff2004; Dethmers2006; Seminoff2007;
mtdna48	Chelonia mydas	Pacific	West Pacific/SE Asia	Sulu Sea	Sulu Sea	rmu41		Turtle Islands, Philippines, Turtle Islands, Sabah, Malaysia	2404-2602 and 8000	2503	unknown	unknown/increasing	decreasing	Turtle Islands; Philippines; Turtle Island; Sabah; Malaysia	Cruz2002; Chan2004; Seminoff2004; Seminoff2007; Dethmers2006
mtdna49	Chelonia mydas	Pacific	West Pacific/SE Asia	Sipidan	Sipidan	rmu41		Sipidan Island, Sabah, Malaysia	800	800	unknown	unknown	unknown	Sipidan Island; Sabah; Malaysia	Chan2004; Seminoff 2004; Seminoff2007; Dethmers2006
mtdna50	Chelonia mydas	Pacific	East	Revillagigedos; Mexico	Revillagigedos; Mexico	rmu34		Revillagigedos Islands, Mexico	90	90	unknown	unknown	unknown	Revillagigedos; Mexico	Seminoff2004; Seminoff2007; Dutton2008;
mtdna51	Chelonia mydas	Pacific	East	Galapagos (Quinta Playa, Isla Isabela, Islas Galapagos used as no specific site identified in literature) - Michoacan; MX	Galapagos - Michoacan; MX	rmu34	ndna17	Playa Colola, Michoacan, Mexico; Quinta Playa, Isla Isabela, Islas Galapagos, Ecuador	1650 (Galap) and 1975 (Mich)	2000	stable/increasing	increasing	decreasing	Galapagos; Michoacan; MX	Bowen1992; Chassin-Noria2004; Seminoff2004; Seminoff2007; Dutton2008
mtdna52	Chelonia mydas	Atlantic	Southeast	Sao Tome-Principe	Sao Tome-Principe	rmu45		Sao Tome and Principe (used Sao Tome as site)	150-200	175	unknown	unknown	unknown	Sao Tome and Principe Islands	Fretey2001; Seminoff2004; Formia2006; Seminoff2007; Godenger2008
mtdna53	Chelonia mydas	Atlantic	East Central	Ascension-Bioko	Ascension-Bioko	rmu46	ndna18	Ascension Island and Bioko Island, Equatorial Guinea	3000-5000 (Asc); 400-600 (Bioko)	4000	decreasing	decreasing	unknown	Ascension Island; Bioko Island; Equatorial Guinea	Bowen1992; Formia2006; Tomas1999; Tomas2000; Tomas2001; Fretey2001; Broderick2001b; Godley2001; Seminoff2004; Moreira2006; Broderick2006; Seminoff2007
mtdna54	Chelonia mydas	Atlantic	Northwest	Costa Rica	Tortuguero	rmu50		Tortuguero, Costa Rica	17,402-37,290	27346	increasing 4.9% per year	increasing	decreasing	Tortuguero; Costa Rica	Encalada1996; Bjorndal1999; Seminoff2004; Bjorndal2005; Troeng2005; Chaloupka2007; Dow2007; Seminoff2007
mtdna55	Chelonia mydas	Atlantic	Northwest	South Caribbean	Suriname-Aves	rmu47	ndna19	Matapica, Suriname; Aves Island, Venezuela	335-443 (VZ); 1,803 (Suriname)	389	decreasing	decreasing	unknown	Matapica; Suriname; Aves Island; Venezuela	Bowen1992; Weijerman1998; Encalada1996; Seminoff2004; Vera2006; Dow2007 Seminoff2007; Vera2007
mtdna56	Chelonia mydas	Atlantic	Northwest	Florida-Yucatan	Florida-Yucatan	rmu50	ndna19	X'Cacel and Isla Cozumel (Yucatan Peninsula), Mexico; Hutchinson Island, Florida, United States (St. Lucie County)	unquantified	-9999	increasing	increasing	unknown	X'Cacel and Isla Cozumel (Yucatan Peninsula), Mexico; Hutchinson Island, Florida, United States (St. Lucie County)	Bowen1992; Lahanas1994; Allard1994; Enacalada1996; Seminoff2004; Chaloupka2007; Dow2007; Seminoff2007
mtdna57	Chelonia mydas	Mediterranean			Cyprus	rmu48	ndna15	Lara Bay, Akamas Peninsula, Cyprus	121-127	124	stable	stable	decreasing	Lara; Cyprus	Bowen1992; Broderick1997; Broderick2002; Godley2002; Margaritoulis2003; Seminoff2004; Seminoff2007
mtdna58	Chelonia mydas	Atlantic	Southwest	Trinidade, Brazil	Trinidade, Brazil	rmu49		Trindade, Brazil	1,500-2,000	1750	increasing	increasing	increasing	Trindade, Brazil	Seminoff2004; Moreira2006; Bjorndal2006; Seminoff2007
mtdna59	Chelonia mydas	Pacific	West Pacific/SE Asia	Pangumbahan	Pangumbahan	rmu42		Pangumbahan, West Java, Indonesia	370	370	decreasing	decreasing	decreasing	Pangumbahan; West Java; Indonesia	Schulz1987; Seminoff2004; Dethmers2006; Seminoff2007
mtdna60	Chelonia mydas	Atlantic	East Central	Guinea Bissau	Guinea Bissau	rmu45	ndna18	Bijagos Archepelago, Guinea Bissau	6299-8273	7286	decreasing (eastern Atlantic)	decreasing	unknown	Pailao; Bijagos Archipelago; Guinea Bissau	Bowen1992; Fretey2001; Catry2002; Seminoff2004; Formia2006; Seminoff2007
mtdna61	Chelonia mydas	Indian	Northwest		Oman	rmu43	ndna14	Ras al Had, Oman	44000? (pers comm in Seminoff2007); 6000-20000	10000	unknown	unknown	unknown	Ras al Had; Oman	Ross1989; Bowen1992; Seminoff2004; Seminoff2007;
mtdna62	Chelonia mydas	Pacific	Northwest		Japan	rmu37	ndna27	Chichi-jima, Ogasawara Islands, Japan	500	500	increasing	increasing	decreasing	Ogasawara Islands; Japan	Bowen1992; Seminoff2004; Seminoff2007; Chaloupka2008
mtdna63	Chelonia mydas	Pacific	West Central	Palau, Micronesia, Marianas	Micronesia	rmu38		Micronesia (Ulithi Atoll, Ngulu Atoll, Elato Atoll)	unquantified	-9999	unknown	unknown	unknown	Ulithi Atoll; Ngulu Atoll; Elato Atoll	Chaloupka2004; Dethmers2006
mtdna64	Chelonia mydas	Pacific	West Pacific/SE Asia	Sarawak	Sarawak	rmu41		Turtle Island, Sarawak, Malaysia	2000	2000	stable/increasing	stable	decreasing	Turtle Islands; Sarawak; Malaysia	Liew2002; Chaloupka2004; Seminoff2004; Chan2006; Dethmers2006; Seminoff2007;
mtdna65	Chelonia mydas	Pacific	West Pacific/SE Asia	Peninsular Malaysia	Peninsular Malaysia	rmu41		Palau Redang, Malaysia	2200	2200	stable	stable	decreasing	Redang Island; Paka Island; Terengganu; Malaysia	Chaloupka2004; Seminoff2004; Chan2006; Dethmers2006; Seminoff2007
mtdna66	Chelonia mydas	Pacific	Southwest	Southern Great Barrier Reef	Southern Great Barrier Reef	rmu39	ndna16	Heron Island, Lady Musgrave Island, North West Island, Australia (south Great Barrier Reef)	562	562	increasing (Heron Island 3.8% per year)	increasing	increasing	Heron Island, Lady Musgrave Island, North West Island, Australia (south Great Barrier Reef)	Bowen et al. 1992; FitzSimmons1996; FitzSimmons1997a; FitzSimmons1997b; Dobbs2002; Limpus2002; Seminoff2004; Dethmers2006; Chaloupka2007; Seminoff2007; Limpus2008a
mtdna67	Chelonia mydas	Pacific	Southwest	Northern Great Barrier Reef	Northern Great Barrier Reef	rmu39	ndna16	Raine Island, No.8 Sandbank, Bramble Cay, Australia (north Great Barrier Reef)	18000-25000	21500	increasing	increasing	stable	Raine Island, No.8 Sandbank, Bramble Cay, Australia (north Great Barrier Reef)	FitzSimmons1996; FitzSimmons1997a; FitzSimmons1997b; Dobbs2002; Limpus2003; Dethmers2006; Chaloupka2007; Limpus2008a
mtdna68	Chelonia mydas	Pacific	Southwest	Coral Sea	Coral Sea	rmu39		Coral Sea Platform, Australia	100s	100	unknown	unknown	unknown	Coral Sea Platform; Australia	FitzSimmons1996; FitzSimmons1997b; Dethmers2006; Limpus2008a
mtdna69	Chelonia mydas	Pacific	Southwest	Gulf of Carpentaria; Australia	Gulf of Carpentaria; Australia	rmu39	ndna12, ndna13	Gulf of Carpentaria (Port Bradshaw, Goote Eylandt, Bountiful Island)	1000s	1000	unknown	unknown	unknown	Gulf of Carpentaria (Port Bradshaw, Goote Eylandt, Bountiful Island)	FitzSimmons1996; FitzSimmons1997a; FitzSimmons1997b; Limpus2003; Dethmers2006; Limpus2008a
mtdna70	Chelonia mydas	Pacific	Southwest	Papua New Guinea	Papua New Guinea	rmu39		Long Island, Papua New Guinea	unquantified	-9999	unknown	unknown	unknown	Long Island; Papua New Guinea	Seminoff2004; Dethmers2006; Seminoff2007
mtdna71	Chelonia mydas	Pacific	Southwest	Enu Island (Aru Island), Indonesia	Enu Island (Aru Island), Indonesia	rmu39		Enu Island (Aru Island), Indonesia	540	540	unknown	unknown	unknown	Enu Island; Indonesia	Seminoff2004; Dethmers2006; Seminoff2007
mtdna72	Chelonia mydas	Indian	Southeast	Ashmore Reef	Ashmore Reef	rmu40		Ashmore Reef	100s	100	unknown	unknown	unknown	Ashmore Reef; Western Australia	Dethmers2006; Limpus2008a
mtdna73	Chelonia mydas	Indian	Southeast	Scott Reef	Scott Reef	rmu40		Scott Reef	unquantified	-9999	unknown	unknown	unknown	Scott Reef; Queensland	Dethmers2006; Limpus2008a
mtdna74	Chelonia mydas	Indian	Southeast	Northwest Shelf (Lacepede islands), Northwest Cape	Northwest Shelf (Lacepede islands), NW Cape	rmu40	ndna12	Lacepede Islands	10,000s	10000	stable	stable	unknown	Lacepede Islands; NW Cape; WAustralia	FitzSimmons1996; FitzSimmons1997b; Dethmers2006; Limpus2008a
mtdna75	Chelonia mydas	Indian	Southwest	Europa	Europa	rmu44		Europa Island	2000-11000	5500	unknown	unknown	unknown	Europa Island	Rene1996; Bourjea2007a; Laurent-Stepler2007; Seminoff2007
mtdna76	Chelonia mydas	Indian	Southwest	Juan de Nova	Juan de Nova	rmu44		Juan de Nova and other scattered islands	unquantified	-9999	unknown	unknown	unknown	Juan de Nova and other scattered islands	Bourjea2007a
mtdna77	Chelonia mydas	Indian	Southwest	North Mozambique Current	North Mozambique Current	rmu44		Aldabra Islands, Farquhar Group, Mayotte Island, Moheli (Comoros Archipelago), Nosy Iranja Kelly, Tromelin (Eparces Islands)	1545 (Mayotte); 3535-4755 (Seychelles); 5000 (Como	1545	stable/increasing	stable/increasing	stable	Aldabra Islands, Farquhar Group, Mayotte Island, Moheli (Comoros Archipelago), Nosy Iranja Kelly, Tromelin (Eparces Islands)	Rene1996; Seminoff2004; Bourjea2007a; Bourjea2007b; Laurent-Stepler2007; Seminoff2007
mtdna78	Dermochelys coriacea	Atlantic	Northwest	Florida	Florida	rmu51	ndna23	Juno Beach, Florida (used Palm Beach County)	ca. 160-180	170	increasing	increasing	increasing	Mostly on Juno Beach, nesting less common on northwest, southwest, and northeast beaches	Dutton2003; TEWG2007; Stewart2007; Tiwari2007
mtdna79	Dermochelys coriacea	Indian	Southwest		South Africa	rmu54	ndna20	Kwa-Zulu Natal, Tongaland, South Africa	20-40	30	stable	stable	stable	Kwa-Zulu Natal, Tongaland, South Africa (Mabibi to Kosi Lake)	Hughes1996; Dutton1999; Lomard2006; Luoro2006; TEWG2007; Tiwari2007; La Casella2008; Lombard2008; Nel2008
mtdna80	Dermochelys coriacea	Pacific	East		Eastern Pacifc	rmu55	ndna21	Playa Mexiquillo, Mexico; Playa Grande, Costa Rica	ca. >200	200	decreasing	decreasing	decreasing	Cabo Pulmo, Baja California Sur; Mainland Mexico from Jalisco to Oaxaca; Guatemala, Nicaragua; Guanacaste, Costa Rica	Spotila1996; Dutton1999; Barragan2000; Dutton2000b; Spotila2000; Sarti2007; Santidrian2007
mtdna81	Dermochelys coriacea	Pacific	West	Papua New Guinea; Papua, Indonesia; Solomon Islands; Vanuatu	Western Pacific	rmu56	ndna22	Kamiali, Papua New Guinea; Jamursba-Media and Warmon, Papua, Indonesia; Solomon Islands (used Lilika as site)	ca. 1000-1840	1420	stable	stable	decreasing	Papua New Guinea; Papua, Indonesia; Solomon Islands; Vanuatu	Dutton2000b; Dutton2007; Tiwari2007
mtdna82	Dermochelys coriacea	Pacific	West	Terengganu, Malaysia	Terengganu, Malaysia	rmu56	ndna22	Terengganu, Malaysia	2-3 (probably extinct)	3	decreasing/likely extinct	decreasing	decreasing	Mainland beaches of Terengganu	Chan1996; Dutton1999; Tiwari2007
mtdna83	Dermochelys coriacea	Atlantic	Northwest	Northern Caribbean	Northern Caribbean	rmu51	ndna23	Sandy Point National Wildlife Refuge, St. Croix, USVI	ca. 186-391	289	increasing	increasing	increasing	St. Croix, VI; Tortola, BVI	Dutton1999; Dutton2005; TEWG2007; Tiwari2007
mtdna84	Dermochelys coriacea	Atlantic	Northwest	Costa Rica / Western Caribbean	Costa Rica / Western Caribbean	rmu51	ndna26	Gandoca and Tortuguero, Costa Rica	ca. 96-502	294	decreasing	decreasing	unknown	Tortuguero to Playa Gandoca	Dutton1999; TEWG2007; Tiwari2007
mtdna85	Dermochelys coriacea	Atlantic	Northwest	Southern Caribbean and the Guianas	Southern Caribbean and the Guianas	rmu51	ndna24	Grand Riviere, Trinidad and Tobago; Les Hattes, French Guiana; Matapica, Suriname	ca.10500-20500	15500	increasing	increasing	increasing	Tinidad and Tobago; French Guiana; Suriname; Guyana	Dutton1999; Girondot2007; Hilterman2007; TEWG2007; Tiwari2007
mtdna86	Dermochelys coriacea	Atlantic	Southwest		Espirito Santo, Brazil	rmu52		Espirito Santo (used generalized site)	ca. 18	18	increasing	increasing	increasing	Northern coast of Espirito Santo, Brazil	TEWG2007; Thome2007; Vargas2007; Tiwari2007
mtdna90	Natator depressus	Indian	Southeast	Torres Strait/Gulf of Carpenteria	Gulf of Carpentaria; Australia	rmu60		Crab, Deliverance, Bountiful and Sandy Islands, Australia	~8500	8500	unknown	unknown	unknown	Crab, Deliverance, Bountiful and Sandy Islands in the Torres Strait, Australia	Dutton2002; Limpus2007a; FitzSimmons2009
mtdna91	Natator depressus	Indian	Southeast	Western Northern Territory	Western Northern Territory	rmu59		Northern Cobourg Peninsula from Black Point. To southeast of Danger Point, Bare Sand Island, Cape Dommet, Field Island and Quail Island, Australia	~9400	9400	unknown	decreasing	unknown	Cobourg Peninsula, Bare Sand Island, Cape Dommet, Field Island and Quail Island in western Northern Territory, Australia	Dutton2002; Limpus2007a; FitzSimmons2009
mtdna92	Natator depressus	Indian	Southeast	Western Australia	Barrow Island	rmu59		Barrow Island, Australia	4500 clutches	4500	unknown	unknown	unknown	Barrow Island, Western Australia, Australia	Dutton2002; Limpus2007a; FitzSimmons2009
mtdna93	Natator depressus	Pacific	Southwest	Eastern Australia	Eastern Australia, Queensland	rmu60		Curtis Island via Gladstone, Peak Island and Wild Duck Island, Australia	221	221	unknown	increasing	decreasing	Eastern Australia, Queensland	Dutton2002; Limpus2007a; FitzSimmons2009
mtdna94	Lepidochelys olivacea	Pacific	West	Australia	Australia	rmu03		The follwing sites in Australia: Cape Leveque, Lanaggi, and Darcy Island in Western Australia; McCluer and Tiwi Islands, Northern Territory; Flinders Beach, Queensland	unquantified	-9999	unknown	unknown	unknown	Western Australia to western Queensland	Bowen1998; Abreu2007; Plotkin2007a; Plotkin2007b; Whiting2007a; Whiting2007b; Limpus2008c; Prince2010

## Sheet: nDNA_metadata
ndnaid	species	ocean basin	ocean region 1	ocean region 2	nDNA stock	sampled sites	rmuid	mtdnaid	population size estimate (text)	population size estimate (number)	oopulation trend (text)	short-term population trend	long-term population trend	geographic boundaries nDNA stock	citations (codes correspond to EndNote Bibliography)
ndna01	Lepidochelys olivacea	Atlantic	West		Atlantic	Bahia, Brazil (used generalized site for Bahia, as no specifc site was cited); Matapica, Suriname; Scattered beached in Orango, Guinea-Bissau	rmu02, rmu05	mtdna01	ca. 6440	6440		increasing	unknown	Suriname south to Sergipe, northwest across Atlantic to Guinea Bissau	Abreu2007; Dow2007; Plotkin2007a; Plotkin2007b; Hahn(in review)
ndna02	Eretmochelys imbricata	Pacific	Southwest		Milman Island	Milman Island, Australia	rmu12	mtdna20	336 - Count taken from modeled value in SWOT DB. Value could be exact, coverted from another count type such as females or crawls, or be the mean of a binned value. Refer to the SWOT database online or SWOT reports for original data.	336		decreasing	decreasing	Milman Island, Australia	Broderick1994; Broderick1996; Abreu2007; Plotkin2007a; Plotkin2007b; Limpus2008c; Limpus2009a
ndna03	Eretmochelys imbricata	Indian	Southeast		Rosemary Island	Rosemary Island, Australia	rmu14	mtdna16	280	280		unknown	unknown	Rosemary Island, Australia	Broderick1994; Broderick1996; Abreu2007; Plotkin2007a; Plotkin2007b; Limpus2008c; Limpus2009a
ndna04	Caretta caretta	Atlantic	Northwest		Northwestern Atlantic	northern Gulf of Mexico, FL, USA (used Gulf County); southern Gulf of Mexico, FL, USA (used Charlotte County); Dry Tortugas, FL, USA (used Monroe County); southern Atlantic, FL, USA (used Palm Beach County); Volusia County, FL, USA; northern Atlantic, FL, USA (used Flagler County); Georgia, USA (used Cumberland Island); South Carolina, USA (used Cape/Lighthouse Islands); North Carolina, USA (used…	rmu25	mtdna26, mtdna27, mtdna28, mtdna29	ca. 17,942	17942	- 37% 1989-2007 *inferred from southern fl stock	decreasing	decreasing	North Carolina to southern Florida on US Atlantic coast, Dry Tortugas, southwestern Florida to Texas on US Caribbean coast	Bowen2005; Nichols2007; NMFS2009; Conant2009
ndna05	Caretta caretta	Atlantic	Southwest		Brazil	Bahia, Brazil (used generalized site for Bahia)	rmu24	mtdna31	>1237	1237	+ 6.4%/yr Bahia, 1.9%/yr Espiritu Santo 1988-2003	increasing	increasing	northern Sergipe to northern Bahia; Bahia to southern Rio de Janiero	Bowen2005; Nichols2007; Conant2009
ndna06	Caretta caretta	Mediterranean		Turkey	Turkey	Fethiye, Turkey	rmu26		ca. 500	500	- 5%/yr 1993-2005 in western turkey	declining	unknown	Dalyan Beach to Belek Beach, Turkey	Schroth1996; Margaritoulis2003; Carreras2007; Nichols2007; Conant2009
ndna07	Caretta caretta	Mediterranean		Cyprus	Cyprus	northern coast of Cyprus (used North coast beaches surrounding Esentepe)	rmu26	mtdna33, mtdna34, mtdna43	ca. 143	143	unknown	unknown	unknown	Beaches of western coast, Chrysochou Bay, northern beaches, Cyprus	Schroth1996; Margaritoulis2003; Carreras2007; Nichols2007; Conant2009
ndna08	Caretta caretta	Mediterranean		Israel	Israel	Beaches of the Mediterranean coast	rmu26		ca. 8	8	unknown	unknown	unknown	Entire coast of Israel	Schroth1996; Margaritoulis2003; Carreras2007; Nichols2007; Conant2009
ndna09	Caretta caretta	Indian	Southeast		Western Australia	Shark Bay and Dirk Hartog, Australia	rmu29	mtdna35	1000-2000	1500	unknown, thought to be depleted before surveys started	unknown	unknown	Sharks Bay world heritage area northward through Ningaloo Marine Park to the North West Cape and to nearby Muiron Islands, Australia	FitzSimmons1996b; Baldwin2003; Nichols2007; Limpus2008b; Conant2009
ndna10	Caretta caretta	Pacific	South		Eastern Australia	Wreck Island and Wongarra (used Mon Repos as site), Australia	rmu30	mtdna36	ca. 500	500	Wongarra = fluctuating, Wreck Island = declining over past 20 yrs	increasing	decreasing	From South Stradbroke Island to Bustard Head, on islands of Capricorn Bunker Group and Swain Reefs and on Bushy Island, Australia	FitzSimmons1996b; Limpus2003; Nichols2007; Limpus2008b; Conant2009
ndna11	Caretta caretta	Mediterranean		Greece/Ionian islands	Greece/Ionian Islands	Zakynthos and Kyparissia, Greece and Ionian Islands	rmu26		ca. 623	623	unknown due to annual fluctuation	decreasing	unknown	Western and southern coasts of Greece and the Ionian Islands, including Zakynthos and Kyparissia	Schroth1996; Margaritoulis2003; Carreras2007; Nichols2007; Conant2009
ndna12	Chelonia mydas	Indian	Southeast		Western Australia	North West Cape, Lacepede Islands, Sandy Island, Australia	rmu40	mtdna69, mtdna74	unquantified	-9999		Unknown	unknown	Western Australia	FitzSimmons1996b; FitzSimmons1997a; FitzSimmons1997b; Seminoff2004; Seminoff2007; Limpus2008a
ndna13	Chelonia mydas	Pacific	Southwest	Gulf of Capernteria	Gulf of Carpentaria	Bountiful Island, Gulf of Carpentaria, Australia	rmu39	mtdna69	unquantified	-9999		unknown	unknown	Gulf of Carpentaria	FitzSimmons1996b; FitzSimmons1997a; FitzSimmons1997b; Seminoff2004; Seminoff2007; Limpus2008a
ndna14	Chelonia mydas	Indian	Northwest		Oman	Ras Al Had, Oman	rmu43	mtdna61	6000-10000	8000		unknown	unknown	Oman	Karl1992; Seminoff2004; Shanker2006; Seminoff2007
ndna15	Chelonia mydas	Mediterranean		Cyprus	Cyprus	Lara Bay, Akamas Peninsula, Cyprus	rmu48	mtdna57	121-127	124		unknown	unknown	Cyprus	Karl1992; Broderick2002; Seminoff2004; Seminoff2007
ndna16	Chelonia mydas	Pacific	Southwest	Great Barrier Reef	Great Barrier Reef	Bramble Cay and Raine Island, north Great Barrier Reef, Australia; North West Island, Heron Island, Lady Musgrave Island, south Great Barrier Reef, Australia	rmu39	mtdna66, mtdna67	ca. 11000	11000		increasing	increasing	Bramble Cay and Raine Island, north Great Barrier Reef, Australia; North West Island, Heron Island, Lady Musgrave Island, south Great Barrier Reef, Australia	Karl1992; FitzSimmons1996b; FitzSimmons1997a; FitzSimmons1997b; Cummings2002; Limpus2003; Seminoff2004; Seminoff2007; Chaloupka2008; Limpus2008a
ndna17	Chelonia mydas	Pacific	East		Galapagos, Michoacan, Mexico	Isabela Island, Galapagos; Playa Colola, Michoacan, Mexico	rmu34	mtdna51	ca. 1902	1902		increasing	decreasing	San Diego Bay south to Peru; West into polynesia	Karl1992; Alvarado2001; Juarez-Cerron2003; Lopez2003; Seminoff2004; Seminoff2007;
ndna18	Chelonia mydas	Atlantic	Southwest		Central Atlantic	Ascension Island; Pailoa, Guinea-Bissau; Atol das Rocas, Brazil	rmu45, rmu46, rmu49,	mtdna46, mtdna53, mtdna60	3000-5000	4000		increasing	unknown	Ascencion Island; Atol Las Rocas; Fernando de Noronha; Brazil	Karl1992; Bellini1996; Fretey2001; Grossman2001; Catry2002; Seminoff2004; Seminoff2007
ndna19	Chelonia mydas	Atlantic	Northwest		North Atlantic	Florida (Hutchinson Island - used St. Lucie County); Yucatan, Mexico (Michoacan - used X'Cacel); Tortuguero, Costa Rica; Aves Island, Venezuela; Matapica, Suriname	rmu47, rmu50	mtdna55, mtdna56	unquantified	-9999		unknown	unknown	Florida to the Yucatan, south to Totuguero, Costa Rica, East to Suriname	Karl1992; Bjorndal1999; Seminoff2004; Troeng2005; Bass2006; Seminoff2007; Chaloupka2007
ndna20	Dermochelys coriacea	Indian	Southwest		South Africa	Kwa-Sulu Natal, Tongaland, South Africa	rmu54	mtdna79	20-100	60		unknown	unknown	Mabibi to Kosi Lake	Spotila1996; Spotila2000; Dutton2003; TEWG2007; Tiwari2007; Nel2008
ndna21	Dermochelys coriacea	Pacific	East		Eastern Pacific	Playa Mexiquillo, Mexico; Playa Grande, Costa Rica	rmu55	mtdna80	ca. >200	200		decreasing	decreasing	Cabo Pulmo, Baja California Sur; Mainland Mexico from Jalisco to Oaxaca; Guatemala; Nicaragua; Guanacaste, Costa Rica	Spotila1996; Barragan1998;Barragan2000; Dutton2000a; Dutton2000b; Spotila2000; SartiMartinez2007; Santidrian2007; Tiwari2007
ndna22	Dermochelys coriacea	Pacific	West		Western Pacifc	Irian Jaya, Indonesia; Solomon Islands (Lilika Island used as site as no specific site was identified); Terengganu, Malaysia	rmu56	mtdna81, mtdna82	840-320	2020		decreasing	decreasing	Papua New Guinea; Papua, Indonesia; Solomon Islands; Vanuatu	Chan1996; Spotila1996; Dutton2000a; Dutton2000b; Spotila2000; Dutton2002b;Benson2007a; Benson2007b; Dutton2007; Petro2007; Tiwari2007; Hitipeuw2007;
ndna23	Dermochelys coriacea	Atlantic	Northwest	Northern Caribbean	Northern Caribbean	Sandy Point National Wildlife Refuge, St. Croix, USVI; Juno Beach, Florida (used Palm County as site)	rmu51	mtdna78, mtdna83	ca. 186-391	289		increasing	increasing	St. Croix, Virgin Islands; Tortola, Bristish Virgin Islands	Dutton2003; Dutton2005; Stewart2007; TEWG2007; Tiwari2007
ndna24	Dermochelys coriacea	Atlantic	Northwest	Southern Caribbean	Southern Caribbean and the Guianas	Grand Riviere, Trinidad and Tobago; Les Hattes, French Guiana; Matapica, Suriname	rmu51	mtdna85	ca. 10,500-20,500	15500		increasing	increasing	Trinidad and Tobago, Suriname, French Guiana, Guyana	Dutton2003; Dutton2005; Rivalan2006; Girondot2007; Hilterman2007; TEWG2007; Tiwari2007
ndna26	Dermochelys coriacea	Atlantic	Northwest	Costa Rica	Costa Rica / Western Caribbean	Gandoca and Tortuguero, Costa Rica	rmu51	mtdna84	ca. 96-502	298		decreasing	unknown	Tortuguero to Playa Gandoca, Costa Rica	Dutton2003; Chacon2007; TEWG2007; Tiwari2007; Troeng2007
ndna27	Chelonia mydas	Pacific	Northwest		Japan/Hawaii	Ogasawara Archipelago, Japan; French Frigate Shoals, Hawaii	rmu35, rmu37	mtdna45, mtdna62	unquantified	-9999		increasing	decreasing	Japan and the northwest Hawaiian Islands	Karl; Balazs2004; Seminoff2004; Chaloupka2007; Seminoff2007
ndna28	Lepidochelys olivacea	Pacific	East		Mexico	Todos Santos, Los Esteros/Pescadero, San Cristobal, San Jose/Frailes, Cabo Pulmo, Punta Colorada, El Verde Camacho, Platanitos, Nuevo Vallarta, Bahia de Banderas, Mismaloya (sección El Playón), Boca de Apiza, Playa Ticuiz, Tierra Colorada, Bahía de Chacahua, Santuario Playa de Escobilla, Barra de la Cruz, Puerto Arista MEXICO	rmu01, rmu09		335,000 (Ostional); >1,169,995 (Escobilla)	1500000		unknown	unknown	Baja California and the pacifc coast of Mexico	Abreu2007; Plotkin2007a; Plotkin2007b; Hahn(in review)

## Sheet: RMU_metadata
rmuid	species	ocean basin	ocean region 1	ocean region 2	mtdnaid	ndnaid	population size estimate (text)	population size estimate (number)	short-term population trend	long-term population trend	geographic boundaries of RMU	citations (codes correspond to EndNote Bibliography)	putative RMU? (see text for details)
rmu01	Lepidochelys olivacea	Pacific	East		mtdna02, mtdna03	ndna28	306-516 (El Verde, Sinaloa); 439-1301 (Platanitos, Nayarit); 483-1437 (Cuyutlan, Colima); 591-2806 (Maruata-Colola, Michoacan); 85-508 (Pto Arista, Chiapas); 1000 (Guatemala); ca 3000 (Costa Rica)	5000	stable	decreasing	Baja California Sur Mexico to southern Peru, the eastern Pacific and northwest of Hawaii	Plotkin1994a; Plotkin1994b; Plotkin1994c; Plotkin1995; Bowen1998; Briseno Duenas1998; IATTC2004; Polovina2004; Lopez-Castro2005; Abreu2007; Plotkin2007a; Plotkin2007b; Valverde2007; Camacho2008; Arauz2009
rmu02	Lepidochelys olivacea	Atlantic	West		mtdna01	ndna01	Ca. 6440 (summed)	6440	increasing	increasing	Margherita and Barbados south to Sergipe Brazil, northwest across to Mid-Atlantic (15 West)	Reichart1993; Bowen1998; Marcovaldi1999; Silva 2003; Thomé2003; Fernandes2004; Silva2007; Abreu2007; Dow2007; Plotkin2007a; Plotkin2007b;Kelle2009
rmu03	Lepidochelys olivacea	Pacific	West		mtdna04, mtdna94		Ca. 3900 (summed)	3900	decreasing	decreasing	Sri Lanka east across SE Asia and Polynesia to Hawaii, south to Australia mid-continent (30 South, 30 North, 130 West)	Bowen1998; Briseno Duenas1998; Polovina2004; Abreu2007; McMahon2007; Plotkin2007a; Plotkin2007b; Whiting2007a; Whiting2007b; Limpus2008c
rmu04	Lepidochelys olivacea	Indian	Northeast		mtdna04		unquantified	-9999	decreasing	decreasing	Gahirmatha, Rushikulya, Devi Rivers, Kalingapatnam, Srikakulam, and Srikurmam south to 4S, similar from the tip of India	Bowen1998; Shanker2004; Shanker2006; Abreu2007; Plotkin2007a; Plotkin2007b
rmu05	Lepidochelys olivacea	Atlantic	East		mtdna01	ndna01	unquantified	-9999	stable	unknown	North Mauritania south to southern Angola, across the atlantic to 35 West	Fretey2001; Abreu2007; Plotkin2007a; Plotkin2007b; Weir2007; Godgenger2008; Godgenger2009;
rmu07	Lepidochelys olivacea	Indian	Northeast (arribadas)		mtdna05		Ca. 176000 (summed)	176000	stable	stable	Gahirmatha, Rushikulya, Devi Rivers, Kalingapatnam, Srikakulam, and Srikurmam south to 4S, similar from the tip of India	Bowen1998; Shanker2004; Shanker2006;Abreu2007; Plotkin2007a; Plotkin2007b
rmu08	Lepidochelys olivacea	Indian	West				unquantified	-9999	decreasing	decreasing	South from the tip of India, looping down 150km south of La Reunion, through Madagascar, and midway through Tanzania	Bowen1998; Shanker2004; Rees2006; Shanker2006; Abreu2007; Plotkin2007a; Plotkin2007b	yes
rmu09	Lepidochelys olivacea	Pacific	East (arribadas)		mtdna03	ndna28	335,000 (Ostional); >1,169,995 (Escobilla)	1500000	increasing	decreasing	Baja California Sur Mexico to southern Peru, the eastern Pacific and northwest of Hawaii	Plotkin1994a; Plotkin1994b; Plotkin1994c; Plotkin1995; Bowen1998; Briseno Duenas1998; IATTC2004; Polovina2004; Lopez-Castro2005; Abreu2007; Plotkin2007a; Plotkin2007b; Camacho2008; Prince2010
rmu10	Eretmochelys imbricata	Atlantic	West	Western Caribbean/USA	mtdna06, mtdna07, mtdna08, mtdna09, mtdna10, mtdna11, mtdna13, mtdna23, mtdna24		3800	3800	increasing	decreasing	Mid Atlantic US out to 35W, south through the Caribbean, to midway down the coast of Guyana	Bass1996; Bass1999; Diaz-Fernandez1999; Abreu-Grobois2003; Dow2007; Mortimer2007a; Mortimer2007b; Monzon-Arguello2010c
rmu11	Eretmochelys imbricata	Atlantic	East		mtdna15		30	30	unknown	unknown	Southern Mauritania into the Atlantic (30 West) missing Cape Verde, south to the Congo (15 South in the Atlantic)	Fretey2001; Rader2006; Abreu2007-2008;Mortimer2007a; Mortimer2007b; Weir2007; Godgenger2008; Monzon-Arguello2010c
rmu12	Eretmochelys imbricata	Pacific	Southwest		mtdna20, mtdna22	ndna02	ca. 6500	6500	decrease	decrease	Queensland AU coast around to the waters off the Solomons and Papua New Guinea	Abreu2007-2008; Parmenter1983; Broderick1994; Broderick1996; Bell2000; Mortimer2007a; Mortimer2007b; Limpus2008d; Limpus2009c;
rmu13	Eretmochelys imbricata	Pacific	East				100	100	unknown	decrease	Baja California Mexico sweeping south into the Eastern Tropical Pacific out to 135 West and 20 South, coming into the middle of Peru	Abreu2007-2008; Mortimer2007a; Mortimer2007b; Gaos in press
rmu14	Eretmochelys imbricata	Indian	Southeast		mtdna16	ndna03	2000	2000	unknown	unknown	Equator to 35 South over to the southern tip of the Australian continent and Indonesia, western bound is 80 east. NOTE: this is an ill defined RMU due to lack of data and should be considered a placeholder.	Broderick1994; Broderick1996; Mortimer2007a; Mortimer2007b; Limpus2008d; Limpus2009a;	yes
rmu15	Eretmochelys imbricata	Atlantic	Southwest		mtdna12		unquantified	-9999	increasing	decreasing	Coastal Brazil from Ceara to Espirito Santo, across the atlantic to Equatorial Guinea and and Gabon (tag returns from Fernando de Noronha)	Bass1996; Lara-Ruiz2006; Marcovaldi2006; Dow2007; Marcovaldi2007;Mortimer2007a; Mortimer2007b; Marcovaldi2008; Marcovaldi2009; Grossman et al 2007.
rmu16	Eretmochelys imbricata	Indian	Northeast				unquantified	-9999	decreasing	unknown	South from the tip of India to the equator, east to Indonesia. NOTE: this is an ill defined RMU due to lack of data and should be considered a placeholder.	Mortimer2007a; Mortimer2007b; Shanker2006	yes
rmu17	Eretmochelys imbricata	Indian	Northwest		mtdna18, mtdna19		unquantified	-9999	unknown	unknown	South from the tip of India to the equator, west to southern Somalia. NOTE: this is an ill defined RMU due to lack of data and should be considered a placeholder.	Broderick1996; Mortimer2007a; Mortimer2007b; Shanker2006	yes
rmu18	Eretmochelys imbricata	Indian	Southwest		mtdna14		unquantified	-9999	stable	decreasing	From the equator to 40 South, 80 East to the southern Somalia and south of the southern tip of South Africa. NOTE: this is an ill defined RMU due to lack of data and should be considered a placeholder.	Mortimer1999; Mortimer2007a; Mortimer2007b	yes
rmu19	Eretmochelys imbricata	Pacific	North Central	Hawaii			unquantified	-9999	stable	unknown	Waters surrounding Hawaii, including the Northern Hawaiian Islands	Mortimer2007a; Mortimer2007b	yes
rmu20	Eretmochelys imbricata	Pacific	South Central				unquantified	-9999	decreasing	decreasing	Vanuatu up to the Eastern Solomon Islands, across the Pacifc to include Tonga Samoa and French Polynesia (equator to 25 South)	Mortimer2007a; Mortimer2007b	yes
rmu21	Eretmochelys imbricata	Pacific	West Central	Palau, Micronesia, Marianas			unquantified	-9999	decreasing	decreasing	Waters surrounding Micronesia, Palau, the Marshalls. Kiribati and the Marianas	Mortimer2007a; Mortimer2007b	yes
rmu22	Eretmochelys imbricata	Pacific	West Pacific/SE Asia	Indonesia, Malaysia, Coral Triangle	mtdna17, mtdna21		unquantified	-9999	decreasing	decreasing	Waters off Indonesia (includes the Banda, Celebes and Sulu Seas) and south of the Japanese main islands.	Broderick1996; Mortimer2007a; Mortimer2007b;	yes
rmu23	Caretta caretta	Atlantic	Northeast	Cape Verde	mtdna32		2000	2000	unknown	unknown	neretic turtles off Guinea and Sierra Leone, oceanic turtles in waters off of Mauritania, Senegal, The Gambia, Guinea and Guinea Bissau, up into the Azores	Lopez-Jurado2000; Fretey2001; Hawkes2006; Lopez-Jurado2007; Nichols2007; Conant2009, Monzon-Arguello2009; Monzon-Arguello2010a.
rmu24	Caretta caretta	Atlantic	Southwest			ndna05	greater than 1237	1237	increasing	increasing	north and south of nesting areas on Brazilian coast, Uruguayan and Argentinian coast, Rio Grande rise (between 5 North - 45 South and 15 - 65 West)	Bowen1994; Encalada1998; Baptistotte2003; Soares2004; Bowen2005; Marcovaldi2007; Nichols2007; Caraccio2008; Marcovaldi2008; NMFS2008; Conant2009; Reis2009
rmu25	Caretta caretta	Atlantic	Northwest		mtdna26, mtdna27, mtdna28, mtdna29, mtdna30, mtdna31	ndna04	ca. 18293-18675	18400	decreasing	decreasing	Cape Cod, Grand Banks, Azores, Madeira, In the Mediterranean west of southern Italy and Tunisia, Gulf Stream, Sargasso sea, Gulf of Mexico, Bahamas, Cuba, US, up to 50 North and down to French Guina	Bowen1994; Bolten1998; Encalada1998; Laurent1998; TEWG2000; Pearse2001a; Pearse2001b; Tiwari2002; Bolten2003; Bowen2004; Bowen2005; Carreras2006; Dow2007; McClellan2007; NMFS2008; Conant2009; Witherington2009;
rmu26	Caretta caretta	Mediterranean			mtdna33, mtdna34, mtdna43	ndna06, ndna07, ndna08, ndna11	ca. 844-1771	1250	stable	decreasing	Entire Mediterranean, through the Strait of Gibraltar and up the Portugal coastline.	Sella1982; Margaritoulis1988c; Argano1992; Laurent1994; Schroth1996; Laurent1998; Lazar2000; Broderick2002; Margaritoulis2003; Med Report - Chapters: "Overview"; Margaritoulis2005; Med Report - Chapters: 'Cyprus,' 'Turkey'; Carerras2006; Broderick2007; Carreras2007; Nichols2007; Revelles2007; NMFS2008; Conant2009
rmu27	Caretta caretta	Indian	Northwest		mtdna37		>25000	25000	unknown	unknown	Arabian Gulf, southern Arabian peninsula westward to Yemen and south of the tip of Somalia, Gulf of Oman eastward to Pakistan	Kapurusinghe2006; Salm1993; Tripathy2005; Shanker2006; Conant2009; National Reports, IOSEA: www.IOSEAturtles.org
rmu28	Caretta caretta	Indian	Southwest		mtdna38		>500	500	increasing	increasing	East past Madagascar to Chagos and St. Brendan, north in Indian Ocean to Kenya, southern border of Somalia, Seychelles, extends 45 South around South Africa to halfway up the coast of Namibia	Hughes1974; Bowen1994; Baldwin2003; Nel2006; Nel2005; Luschi2006; Nichols2007; Papillon2007; Rakotonirina1994; Nel2008; Conant2009
rmu29	Caretta caretta	Indian	Southeast		mtdna35	ndna09	1000-2000	1500	unknown	unknown	Wrapping around Flinders Bay in Western Australia up to the strait between Java and Sumatra, includes the Java, Timor and Arafura seas, eastern boudary is from eastern area of Indonesia to the Torres Strait.	FitzSimmons1996; Baldwin2003; Limpus2003; Nichols2007; Limpus2008b; Conant2009
rmu30	Caretta caretta	Pacific	South		mtdna36	ndna10	560-570	565	increasing	decreasing	New Caledonia, Coral Sea, Australia from the Gulf of Carpenteria to New South Wales, Solomon Islands, eastern peninsula of Papua New Guinea, across the Pacifc (equator to 30 South) to Nouthern Peru and the middle of Chile	Limpus1985; Limpus1992; Bowen1994; Bowen1995; FitzSimmons1996a; Donoso2000; Chaloupka2001; Chaloupka2003; Limpus2003; Chaloupka2004; Nichols2007; Chaloupka2008;Poiner1996; Limpus2008b; Boyle2009; Conant2009; Velez et al 2010.
rmu31	Caretta caretta	Pacific	North		mtdna39		<1000	1000	increasing	decreasing	Migration routes through 28-40 North, transition zone, chlorophyll fronts, Kuroshio extension current, East China Sea, South China Sea, across the Pacifc to Oregon and Baja California Sur Mexico	Iwamoto1985; Bowen1994; Bowen1995; FitzSimmons1996a; Kamezaki1997; Sakamoto1997; Nichols2000; Chaloupka2001; Hatase2002; Kamezaki2003; Alfaro-Shigueto2004; Chaloupka2004; Nobetsu2004; Polovina2004; Mangel2006; Peckham2007; Chaloupka2008; LeRoux2008; Limpus2008b; Kamezaki(in press); Conant2009
rmu32	Caretta caretta	Indian	Northeast				unquantified	-9999	unknown	unknown	Southern tip of India down to 5 South, across to below the western extent of Indonesia and up to the middle of Myanmar	Shanker2006; Nichols2007; Conant2009; National Reports, IOSEA: www.IOSEAturtles.org	yes
rmu34	Chelonia mydas	Pacific	East		mtdna50, mtdna51	ndna17	90; 1650 (Galapagos) and 1975 (Michocan)	3750	increasing	decreasing	Los Angeles south, sweeping down the coast of Chile and the Eastern Tropical Pacific out to 145 West	Green1984; Bowen1992; Karl1992; Seminoff2002; Seminoff2003; Chaloupka2004; Chassin-Noria2004; Seminoff2004; Seminoff2007; Dutton2008; Seminoff2008; Marambio et al. 2007; Troncoso & Urbina 2007
rmu35	Chelonia mydas	Pacific	North Central	Hawaii	mtdna45	ndna27	574	574	increasing	decreasing	Waters surrounding Hawaii, including the Northern Hawaiian Islands	Bowen1992; Karl1992; Balazs2004; Seminoff2004; Chaloupka2007; Bowen1992; Chaloupka2004; Chaloupka2005; Seminoff2007; Chaloupka2007; Dutton2008;
rmu36	Chelonia mydas	Pacific	South Central				unquantified	-9999	unknown	unknown	Vanuatu , across the Pacifc to include Tonga Samoa and French Polynesia (13 to 22 South)	Bowen1992; Karl1992; Balazs2004; Chaloupka2004; Craig2004; Seminoff2004; Limpus2007b; Seminoff2007
rmu37	Chelonia mydas	Pacific	Northwest		mtdna62	ndna27	unquantified	-9999	increasing	decreasing	Midway along the largest Japanese island down to include the southern Japanese islands, Taiwan and China from 30N south.	Bowen1992; Karl1992; Song2002; Cheng2000; Chaloupka2004; Seminoff2004; Hatase2006; Chaloupka2007; Seminoff2007
rmu38	Chelonia mydas	Pacific	West Central	Palau, Micronesia, Marianas	mtdna63		unquantified	-9999	unknown	unknown	North of the eastern extent of Indonesia (equator) and the southern extent of the Philippines, includes Palau, Guam, Micronesia and the Marshalls, extends to 170E in the Pacific, includes overlap in the Banda, Celebes and Sulu Seas	Chaloupka2004; Seminoff2004; Dethmers2006; Seminoff2007
rmu39	Chelonia mydas	Pacific	Southwest		mtdna66, mtdna67, mtdna68, mtdna69, mtdna70, mtdna71	ndna13, ndna16	ca. 19000-26000	22500	increasing	increasing	South of the eastern extent of Indonesia to midway through New South Wales Australia, wraps around Papua New Guinea and out to New Caledonia but excludes the Solomons and Vanuatu, includes overlap in the Banda, Celebes and Sulu Seas	Bowen1992; Karl1992; Limpus1994; FitzSimmons1996a; Poiner1996; FitzSimmons1997a; FitzSimmons1997b; Chaloupka2001; Dobbs2002; Chaloupka2002; Limpus2003; Chaloupka2004; Seminoff2004; Dethmers2006; Chaloupka2007; Limpus2007; Seminoff2007; Chaloupka2008; Limpus2008a
rmu40	Chelonia mydas	Indian	Southeast		mtdna72, mtdna73, mtdna74	ndna12	unquantified	-9999	unknown	unknown	Southern-most islands of Indonesia extending along 110E to Australia, includes the Timor Sea. Into the Gulf of Carpenteria, includes overlap in the Banda, Celebes and Sulu Seas	Bowen1992; Karl1992; Prince1994; FitzSimmons1996a; Fitzsimmons1997b; Prince2000; Dethmers2006; Limpus2008a;
rmu41	Chelonia mydas	Pacific	West Pacific/SE Asia	Indonesia, Malaysia, Coral Triangle	mtdna47, mtdna48, mtdna49, mtdna64, mtdna65		ca. 20000	21000	stable	decreasing	Around the central Indonesian islands and the westernmost islands of the Philippines, Malaysia, and partway up the coast of China, includes overlap in the Banda, Celebes and Sulu Seas	Schulz1984; Schulz1987; Bowen1992; Karl1992; Liew1995; Chaloupka2001; Cruz2002; Chaloupka2004; Chan2004; Seminoff2004; Chan2006; Dethmers2006; Chaloupka2007; Cheng2007; Limpus2007b; Seminoff2007;
rmu42	Chelonia mydas	Indian	Northeast		mtdna59		unquantified	-9999	unknown	unknown	Southern side of Indonesia from 110E out to 90E and up to India, cutoff eastward is the strait between Indonesia and Malaysia	Seminoff2004; Shanker2006; Seminoff2007; Yasuda2006;
rmu43	Chelonia mydas	Indian	Northwest		mtdna61	ndna14	6000-10000	8000	unknown	unknown	Sri Lanka and the southern tip of India down to the Seychelles, up to the tip of Somalia, includes, the Red Sea, the Persian Gulf and the Gulf of Oman	Ross1989; Bowen1992; Karl1992; Asrar1999; Frazier2000; Seminoff2004; Shanker2006; Seminoff2007
rmu44	Chelonia mydas	Indian	Southwest		mtdna75, mtdna76, mtdna77		ca. 12000-22000	16180	increasing	decreasing	Southern Somalia out to Chagos, coming down around St. Brendan, wrapping around South Africa to middle of the ocast of Namibia, southern extent is 42S	Mortimer1988; Bowen1992; Karl1992; Rakotonirina1994; Rene1996; Hughes1998; Pelletier2003; Seminoff2004; Bourjea2006; Formia2006; Louro2006; Mortimer2006; Bourjea2007a; Bourjea2007b; Garnier2007; Limpus2007b; Lauret-Stepler2007; Seminoff2007; Pereira2009;
rmu45	Chelonia mydas	Atlantic	East		mtdna52, mtdna60	ndna18	400-600 (Bioko); 80-100 Sao Tome and Principe	500	decreasing	unknown	Coastal from Western Sahara, down to Angola, excludes Cape Verde	Fretey2001; Seminoff2004; Formia2006; Seminoff2007; Godenger2008; Monzon-Arguello2010b
rmu46	Chelonia mydas	Atlantic	Central	Ascension	mtdna53	ndna18	3000-5000	4000	increasing	increasing	Almofala in the north of Brazil south to Ubatuba on the west Atlantic Including Brazilian offshore islands, Guinea-Bissau south to the Gulf of Guinea on the east Atlantic, and Ascension Island in the central Atlantic	Bowen1992; Formia2006; Tomas1999; Tomas2000; Tomas2001; Fretey2001; Broderick2001b; Godley2001; Seminoff2004; Moreira2006; Broderick2006; Formia2007; Seminoff2007
rmu47	Chelonia mydas	Atlantic	South Caribbean	Aves Island, Antilles, Guiana Shield	mtdna55	ndna19	2100	2100	decreasing	unknown	Columbia out along the Antilles, then coastal around the top of the bulge of Brazil, includes Aves Island	Bowen1992; Moreira1995; Bellini1996; Broderick2001b; Godley2001; Grossman2001; Seminoff2004; Caraccio2005; Bjorndal2006; Broderick2006; Moreira2006; Dow2007; Naro-Maciel2007; Seminoff2007; Proietti2009; Monzon-Arguello2010b
rmu48	Chelonia mydas	Mediterranean			mtdna57	ndna15	121-127	124	stable	decreasing	Bay in the middle of Libya's coastline to southern Albania	Sella1982; Bowen1992; Karl1992; Broderick1997; Lazar2004; Panagopoulos2001; Broderick2007; Godley2002; Broderick2002.; Margaritoulis2003; Seminoff2004; Med Report - Chapters: "Overview"; Med Report - Chapters: "Cyprus", "Turkey"; Med Report - Chapters: "Overview"; Carreras2007; Seminoff2007; Rees2008
rmu49	Chelonia mydas	Atlantic	Southwest		mtdna46, mtdna58	ndna18	1500-2500	2000	increasing	increasing	Most of northern Brazil out to 11E; coastal extension to the middle of Argentina	Mortimer1987; Bowen1992; Karl1992; Moreira1995; Bellini1996; Marcovaldi1999a; Marcovaldi1999b; Luschi2001; Broderick2001b; Bugoni2001; Godley2001; Grossman2001; Moreira2003; Seminoff2004; Caraccio2005; Santos2005; Bjorndal2006; Broderick2006; Miller2006; Baptistotte2007; Dow2007; Miller2007; Naro-Maciel2007; Seminoff2007;Bellini2008; Nagaoka2008; Fiedler2009; Marcovaldi2009; Lezama2009; Proietti2…
rmu50	Chelonia mydas	Atlantic	Northwest		mtdna54, mtdna56	ndna19	17,402-37,290 (Tortuguero); 335-443 Suriname	30000	increasing	decreasing	Central American and the Gulf of Mexico, the Caribbean (excluding the Antilles), out to Bermuda and back into the US at the mid Atlantic coast. (Inlcudes Aves Island)	Hoffman1982; Bowen1992; Karl1992; Allard1994; Lahanas1994; Encalada1996; Bass1998; Weijerman1998; Bjorndal1999; Seminoff2004; Bjorndal2005; Troeng2005; Blumenthal2006; Bass2006; Vera2006; Chaloupka2007; Dow2007; Vera2007; Seminoff2007;
rmu51	Dermochelys coriacea	Atlantic	Northwest		mtdna78, mtdna83, mtdna84, mtdna85	ndna23, ndna24, ndna26	ca. 4800-11,000	7900	increasing	increasing	Northern Canada, under Greenland and Iceland around to the beginning of Russia, the Mediterranean, the Atlantic south to the bulge of Brazil and Nigeria	Pritchard1973; Pritchard1982; Dutton1999; Dutton2000; Lutcavage2003; Ferraroli2004; Hays2004; Troeng2004; Dutton2005; James2005a,b,c; Eckert2006a,b; James2006; Jonsen2006; McMahon2006; Chacon2007; Evans2007; Girondot2007; Hernandez2007; Hilterman2007; James2007; Jonsen2007; Ordonez2007; Sherril-Mix2007; Stewart2007; TEWG2007; Tiwari2007; Troeng2007; Vargas2007;
rmu52	Dermochelys coriacea	Atlantic	Southwest		mtdna86		10-20	15	increasing	increasing	Southern Argentina to South Africa, up to the bulge of Brazil and across to Senegal	Marcovaldi1999; Kotas2004; Pinedo2004; Billes2006a,b; Dutton2005; Dutton2006; Dow2007; Fretey2007; López-Mendilaharsu2007; Thome2007; Tiwari2007; TEWG2007; Thome2008; Vargas2008; Sales2008; Fiedler2009; Lopez-Mendilaharsu2009
rmu53	Dermochelys coriacea	Atlantic	Southeast				ca. 15,000-41,000 in Gabon alone	23000	stable	unknown	Southern Argentina to South Africa, up to the bulge of Brazil and across to Senegal	Billes2003; Dutton2005; Fretey2007; TEWG2007; Tiwari2007; Godgenger2008a; Godgenger2008b; Witt2008; Godgenger2009; Lopez-Mendilaharsu2009; Witt2009;
rmu54	Dermochelys coriacea	Indian	Southwest		mtdna79	ndna20	20-100	60	stable	stable	Tanzania looping out to Mauritius, around South Africa as far south as 45S, and up to northern Angola and the Mascarene Plateau	Rakotonirina1994; Hughes1996; Hughes1998; Dutton1999; Dutton2000; Luschi2003b; Hamman2006; Lombard2006; Louro2006; Luschi2006; TEWG2007; Tiwari2007;LaCasella2008; Lambardi2008; Lombard2008;Nel2008;
rmu55	Dermochelys coriacea	Pacific	East		mtdna80	ndna21	ca. >200	200	decreasing	decreasing	From the tip of Baja California MX south to Chile, out to 135W	Spotila1996; Morreale1996; Eckert1997; Dutton1998; Duttton1999; Barragan2000; Donoso2000; Dutton2000b; Spotila2000; Donoso2007; Piedra2007; Sarti Martínez2007; Santidrián2007; Tiwari2007; Shillinger2008; Shillinger2010
rmu56	Dermochelys coriacea	Pacific	West		mtnda81, mtdna82	ndna22	ca. 840-3,200	2020	stable	decreasing	Tasmania, Queensland and Northern Territory AU to include part of Indonesia, the Coral Triangle, Southeast Asia, Japan, China and part of Russia, across the Pacific at 48N to the northern US and part of Chile (excluding the Eastern Tropical Pacific)	Chan1996; Spotila1996; Dutton1999; Donoso2000; Dutton2000; Dutton2000a; Spotila2000; Dutton2002b; Benson2007a; Benson2007b; Benson2007c; Dutton2006; Dutton2007; Petro2007; Tiwari2007; Hitipeuw2007; Limpus 2009b
rmu57	Dermochelys coriacea	Indian	Northeast				unquantified	-9999	unknown	unknown	South from the tip of India to the equator and across to Indonesia, cutoff is the strait between Indonesia and Malaysia	Shanker2006; Hamann2006; Tiwari2007
rmu58	Lepidochelys kempii	Atlantic	Northwest				ca. 8000	8161	increasing	decreasing	Gulf of Mexico, around Florida and up the US east coast to Cape Cod	Bowen1998; TEWG1998; TEWG2000; Shanker2004; Marquez2005; Shaver2005a; Shaver2005b; Shaver2005c; Guzman-Hernandez2006; Bowen2007; Dow2007; Burchfield2009; Shaver2008; Shaver2009; FWC2009; NMFS&USFWS(in review)
rmu59	Natator depressus	Indian	Southeast	Northern and Western Australia	mtdna91, mtdna92		27000	27000	stable	stable	Southern Queenslands AU following the continental shelf around mainaland Papual New Guinea, cutoff is the Gulf of Carpenteria west of Cape York	Dutton2002; Chaloupka2004; Limpus2007a; Whiting2009; FitzSimmons2009; Pendoley(in press); Whiting(in press)
rmu60	Natator depressus	Pacific	Southwest	Eastern Australia	mtdna90, mtdna93		664	664	stable	stable	East Cape york, north along coastlines to Huon Gulf in Papua New Guinea, east to Tweed heads (Tweed heads 28.16, 153.54)	Dutton2002; Chaloupka2004; Limpus2007a; Poiner1996; FitzSimmons2009; Whiting(in press);
